# Supplementary material for: Quantitative trait loci identification and breeding value estimation of grain weight-related traits based on a new wheat 50K single nucleotide polymorphism array-derived genetic map
Source: Front Plant Sci. 2022 Aug 30;13:967432. doi: 10.3389/fpls.2022.967432 (PMC9468616; doi:10.3389/fpls.2022.967432)
Supplement: Supplementary file 1 [file Data_Sheet_1.xlsx]

## Sheet: Table S1
Table S1 List of primers used in this study.
Primer pairs		Primer sequence (5'–3')	Reference	Used for
TaGW2-1	Forward	ATGGGGAACAGAATAGGAGGGAGGA	Su et al. 2011	Coding sequence cloning of TaGW2
	Reverse	TTACAACCATGCCAACCCTTGCGTG
Hap-6A-P1	Forward	CGTTACCTCTGGTTTGGGTGTCGTG	Su et al. 2011	Promoter cloning of TaGW2-A1
	Reverse	CACCTCTCGAAAATCTTCCCAATTA
Hap-6A-P2	Forward	GAGAAAGGGCTGGTGCTATGGA
	Reverse	GTAACGCTTGATAAACATAGGTAAT
TaGW2-A1_InDel	Forward	CGTGTCACAAAACTAATTGGG	Zhai et al. 2018	Amplify a region of approximately 2.0-kb upstream from the initiation codon
	Reverse	CCTCCCAGATCTAGCCTCCT
K-TaGW2	K1_TaGW2_Aspecific	AGAGCAATTTGTAAGTCTTATTCC	Simmonds et al. 2016	Differentiate the two variants of the G2373A SNP
	K2_TaGW2_Awt	GCTTCAATGACTTTCTGTTCTTCC
	K3_TaGW2_Amutant	GCTTCAATGACTTTCTGTTCTTCT
TaBT1-6B-InDel-2029 marker	B-2F	CTTAGTTCACTTGCCATTTTTCTCA	Wang et al. 2019	Amplified promoter region of TaBT1-6B from -2454 to -886
	B-4R	AGCCGTCTGTGCCAATCTGT
	B-357F	GTCGTCTCCCATGCCCTACTCT		Amplified promoter region of TaBT1-6B from -2102 to -1890
	B-569R	CGGGAAGCGGCGGTAGC
TaBT1-6B-CAPS-1664 marker	B-CAPS-F	GTTGCAGCGCCTGGAGTG	Wang et al. 2019	Amplified promoter region of TaBT1-6B from -1985 to -867
	B-CAPS-R	AGCCGTCTGTGCCAATCTGT
KASP_AX-109308935	Fam	GAAGGTCGGAGTCAACGGATTAGTCCAGATCTAGGTCACACTC	Li et al. 2022
	Hex	GAAGGTGACCAAGTTCATGCTAGTCCAGATCTAGGTCACACTG
	Com	CTCCATTTCTCTCACTCCGCTG
KASP6A-2121	Fam	GAAGGTGACCAAGTTCATGCTTGTGGTAGCAACACCTTTTCA		Narrowing the target QTL intervals
	Hex	GAAGGTCGGAGTCAACGGATTTGTGGTAGCAACACCTTTTCG
	Com	TCGAATGACCAAAGCATACTATGT
KASP6A-3535	Fam	GAAGGTGACCAAGTTCATGCTACTAATCTGAAAACGCAACCCC
	Hex	GAAGGTCGGAGTCAACGGATTACTAATCTGAAAACGCAACCCG
	Com	CGGAGGGGAAAGTTGTGG
KASP6A-1	Fam	GAAGGTGACCAAGTTCATGCTCCAAATTCTGGCCCACTCCT
	Hex	GAAGGTCGGAGTCAACGGATTCCAAATTCTGGCCCACTCCC
	Com	TTGGTGGCAAGGATTTGGGC
KASP6A-2	Fam	GAAGGTGACCAAGTTCATGCTGGTAGACAAGGAGGGGTCCA
	Hex	GAAGGTCGGAGTCAACGGATTGGTAGACAAGGAGGGGTCCG
	Com	CCTCTTGTCCCCATGGGTT
KASP6A-3	Fam	GAAGGTGACCAAGTTCATGCTAGATGTCCTGAATTTTGAAGCTCT
	Hex	GAAGGTCGGAGTCAACGGATTAGATGTCCTGAATTTTGAAGCTCC
	Com	GTTCATGGCGTACGTCTGTTT
KASP6A-4	Fam	GAAGGTGACCAAGTTCATGCTGTAGGGGCGAGGGGGAGT
	Hex	GAAGGTCGGAGTCAACGGATTGTAGGGGCGAGGGGGAGC
	Com	CGTTCGAGCTTCAGTGTACGA
KASP6A-5	Fam	GAAGGTGACCAAGTTCATGCTAGGGCATAGAACCTCAATACA
	Hex	GAAGGTCGGAGTCAACGGATTAGGGCATAGAACCTCAATACG
	Com	GGGCAAGCTCTTATCTGTTGAC
KASP6A-6	Fam	GAAGGTGACCAAGTTCATGCTAAGAAACAGGGCGCGGTCT
	Hex	GAAGGTCGGAGTCAACGGATTAAGAAACAGGGCGCGGTCA
	Com	CCGTTCTTCCCCTCCTGCA
KASP6A-7	Fam	GAAGGTGACCAAGTTCATGCTGTGCAGGAGAGGAAGGCGA
	Hex	GAAGGTCGGAGTCAACGGATTGTGCAGGAGAGGAAGGCGG
	Com	CGTCCTCCTCCCTCACGA
KASP6A-8	Fam	GAAGGTGACCAAGTTCATGCTAGGGCGGCGTCAATTCCT
	Hex	GAAGGTCGGAGTCAACGGATTAGGGCGGCGTCAATTCCC
	Com	TCCTTGAGTTTGCTCTCTCTCAA
KASP6A-9	Fam	GAAGGTGACCAAGTTCATGCTACACATGAGGTAGGAAGCGA
	Hex	GAAGGTCGGAGTCAACGGATTACACATGAGGTAGGAAGCGG
	Com	ACCCCCGACATCTTCTCCA
KASP6A-10	Fam	GAAGGTGACCAAGTTCATGCTGATGGGGATAGAGACCGGTCT
	Hex	GAAGGTCGGAGTCAACGGATTGATGGGGATAGAGACCGGTCA
	Com	GTCTCCATCTCCGGCGGC
KASP6A-11	Fam	GAAGGTGACCAAGTTCATGCTAGAGGGAGAACCGGCCAA
	Hex	GAAGGTCGGAGTCAACGGATTAGAGGGAGAACCGGCCAG
	Com	CTTCGCCCGCATGAACCCT
KASP6A-12	Fam	GAAGGTGACCAAGTTCATGCTCCGGAATTCTGTTGGTCATACTATT
	Hex	GAAGGTCGGAGTCAACGGATTCCGGAATTCTGTTGGTCATACTATC
	Com	AGCTTGCTTCTTTTACATAACACG
KASP6A-13	Fam	GAAGGTGACCAAGTTCATGCTTTTCGCCACCGTTCCCTTTT
	Hex	GAAGGTCGGAGTCAACGGATTTTTCGCCACCGTTCCCTTTC
	Com	AGGTCAGGCGGATGAGGT
KASP6A-14	Fam	GAAGGTGACCAAGTTCATGCTCTGCCCGCCTACTTGTCA
	Hex	GAAGGTCGGAGTCAACGGATTCTGCCCGCCTACTTGTCG
	Com	AGGGAGAGGGGAAAGTGAGT
KASP6A-15	Fam	GAAGGTGACCAAGTTCATGCTAAGTCCACAAAGCAATTGAAGAT
	Hex	GAAGGTCGGAGTCAACGGATTAAGTCCACAAAGCAATTGAAGAC
	Com	AAAAACCCCAACCTCGCA
KASP6A-16	Fam	GAAGGTGACCAAGTTCATGCTCACCGCGCCAAGTCCCTA
	Hex	GAAGGTCGGAGTCAACGGATTCACCGCGCCAAGTCCCTG
	Com	GAGAATGGGCGTTTCTGGC
KASP6A-17	Fam	GAAGGTGACCAAGTTCATGCTAATAGTTATTTGGATCACAGAGCT
	Hex	GAAGGTCGGAGTCAACGGATTAATAGTTATTTGGATCACAGAGCG
	Com	GAGGATCCACTCGCGTCTATAC
KASP6A-18	Fam	GAAGGTGACCAAGTTCATGCTGCCCAGGGAGTTTTGCGTT
	Hex	GAAGGTCGGAGTCAACGGATTGCCCAGGGAGTTTTGCGTC
	Com	TCGTTCCTGTGCAGAGGACA
KASP6A-19	Fam	GAAGGTGACCAAGTTCATGCTACTACTCCTTATATGTGTACCACA
	Hex	GAAGGTCGGAGTCAACGGATTACTACTCCTTATATGTGTACCACG
	Com	TGCCATGGGTGATGTGCAAA
KASP6A-20	Fam	GAAGGTGACCAAGTTCATGCTACGGAGGATGGAAGGTTCAT
	Hex	GAAGGTCGGAGTCAACGGATTACGGAGGATGGAAGGTTCAC
	Com	CACCGAACAGCACTCCTCC
KASP6A-21	Fam	GAAGGTGACCAAGTTCATGCTCGACGCCTAGGAGCTTGAT
	Hex	GAAGGTCGGAGTCAACGGATTCGACGCCTAGGAGCTTGAC
	Com	TAAGCGAAGTAGGCGACGTC
KASP6A-22	Fam	GAAGGTGACCAAGTTCATGCTGAGTGGAGCAGCGAGATGT
	Hex	GAAGGTCGGAGTCAACGGATTGAGTGGAGCAGCGAGATGC
	Com	ACCCCGCCTCCTTCACCA
KASP6A-23	Fam	GAAGGTGACCAAGTTCATGCTCACCCTTTAGGAAATCTCGTTGT
	Hex	GAAGGTCGGAGTCAACGGATTCACCCTTTAGGAAATCTCGTTGC
	Com	CGATGTGAAGGCTCCAAATTCTT
KASP6A-24	Fam	GAAGGTGACCAAGTTCATGCTTGGTCTTGGTGTTGGAGTACAA
	Hex	GAAGGTCGGAGTCAACGGATTTGGTCTTGGTGTTGGAGTACAG
	Com	AAAGCAGAGGAGGAAGAAGC
KASP6A-25	Fam	GAAGGTGACCAAGTTCATGCTCGCCGAGCTTAACCTGACA
	Hex	GAAGGTCGGAGTCAACGGATTCGCCGAGCTTAACCTGACG
	Com	CTCGATCACTTGGATGTCTTCG
KASP6A-26	Fam	GAAGGTGACCAAGTTCATGCTCCCGCATCCCTCCACTCT
	Hex	GAAGGTCGGAGTCAACGGATTCCCGCATCCCTCCACTCC
	Com	GTCTCCATGGTCATCGCCG
KASP6A-27	Fam	GAAGGTGACCAAGTTCATGCTCGAGATGTGTGGGTTTGACA
	Hex	GAAGGTCGGAGTCAACGGATTCGAGATGTGTGGGTTTGACG
	Com	CTTGTTTTCTTTGCTGCCCAAT
KASP6A-28	Fam	GAAGGTGACCAAGTTCATGCTCAGATTACATGGAACGTGCTCAT
	Hex	GAAGGTCGGAGTCAACGGATTCAGATTACATGGAACGTGCTCAC
	Com	CAGATACGCGTAGTTTCAGTTTGA
KASP6A-29	Fam	GAAGGTGACCAAGTTCATGCTGAATGGGGGATCCGATGCA
	Hex	GAAGGTCGGAGTCAACGGATTGAATGGGGGATCCGATGCG
	Com	GCACGTTTCATGTCCACCG
KASP6A-30	Fam	GAAGGTGACCAAGTTCATGCTGTTGTGTGTATACAGGTGATTGATA
	Hex	GAAGGTCGGAGTCAACGGATTGTTGTGTGTATACAGGTGATTGATG
	Com	CGCAAAGGGAAGATTGGCGT
KASP6A-31	Fam	GAAGGTGACCAAGTTCATGCTAGTCATGAACCTGAGGTATGCTA
	Hex	GAAGGTCGGAGTCAACGGATTAGTCATGAACCTGAGGTATGCTG
	Com	CAGTCAGATTGGATATTTCCTTGTT
KASP6A-32	Fam	GAAGGTGACCAAGTTCATGCTTCATCCGCTTCGACCTACCT
	Hex	GAAGGTCGGAGTCAACGGATTTCATCCGCTTCGACCTACCA
	Com	GGTGGGACGGCACATTGAA
KASP6A-33	Fam	GAAGGTGACCAAGTTCATGCTGCCTACTTGTCGCCCCCA
	Hex	GAAGGTCGGAGTCAACGGATTGCCTACTTGTCGCCCCCG
	Com	AGGGAGAGGGGAAAGTGAGT
KASP6A-34	Fam	GAAGGTGACCAAGTTCATGCTCCTCCTCCTCCTCCTCCCA
	Hex	GAAGGTCGGAGTCAACGGATTCCTCCTCCTCCTCCTCCCG
	Com	GGTTGCTCAACATGCTCCTG
KASP6A-35	Fam	GAAGGTGACCAAGTTCATGCTTCAGAATTTTCTCCTTGCGTAAT
	Hex	GAAGGTCGGAGTCAACGGATTTCAGAATTTTCTCCTTGCGTAAC
	Com	TGTTCTGAAGAAGCAAGGAAGGTA
	Fam	GAAGGTGACCAAGTTCATGCTGACTTGCGGCGTTGAACAA
	Hex	GAAGGTCGGAGTCAACGGATTGACTTGCGGCGTTGAACAG
	Com	CTTTGTTGCCGCCTTGCTA
KASP6A-37	Fam	GAAGGTGACCAAGTTCATGCTAGAGATGATGATCAATCGACGAT
	Hex	GAAGGTCGGAGTCAACGGATTAGAGATGATGATCAATCGACGAC
	Com	GACCGGTAAGCGCATCGGA
SSR1	Forward	GTCGAGGAGGGAGTAGTTCT
	Reverse	GGGAGAAACATCATAAGATCC
SSR2	Forward	TCCTAAGCATGAAACCATGTA
	Reverse	CTATGACTGGCGTTATAGCAA
SSR3	Forward	ATCATCCTTCTTCCTTTGTTT
	Reverse	TACTGATCTTTGTGTCCGAAT
SSR4	Forward	ATGGGTCCATAGGAAGTATCT
	Reverse	ACCGCCAAAGAGTATTAAATC
SSR5	Forward	CGTGGAAAGTACATATCCCTA
	Reverse	GTCATGTGTTACTAGGGCAAC
SSR6	Forward	ATTTTTCTCTTGGGTCAAACT
	Reverse	CCCTCTCACACTCTCTTCTCT

## Sheet: Table S2
Table S2 General information of the genetic linkage map.
Chromosome	Group	Length	No. of binmarkers	No. of markers	Denisty(cM/bin)	Denisty(cM/marker)
1A	1	59.248	41	302	1.44507	0.196185
2A	1	98.333	49	165	2.0068	0.595958
3A	1	18.337	9	21	2.03744	0.87319
	2	41.354	15	126	2.75693	0.328206
4A	1	82.039	63	124	1.30221	0.661605
5A	1	115.905	51	134	2.27265	0.864963
	2	25.154	11	46	2.28673	0.546826
6A	1	55.196	22	77	2.50891	0.716831
7A	1	101.116	55	196	1.83847	0.515898
1B	1	87.926	55	224	1.59865	0.392527
2B	1	126.656	34	80	3.72518	1.5832
3B	1	113.433	47	350	2.41347	0.324094
4B	1	57.301	29	286	1.9759	0.200353
5B	1	118.032	70	219	1.68617	0.538959
6B	1	98.771	59	211	1.67408	0.468109
7B	1	128.322	90	396	1.4258	0.324045
1D	1	80.228	19	272	4.22253	0.294956
2D	1	116.571	42	170	2.7755	0.685712
3D	1	63.355	40	218	1.58387	0.290619
4D	1	41.562	30	106	1.3854	0.392094
5D	1	107.526	40	51	2.68815	2.10835
6D	1	61.541	25	65	2.46164	0.946785
	2	10.661	9	128	1.18456	0.0832891
7D	1	131.212	43	172	3.05144	0.76286
A genome	9	593.493	316	1191	1.87814	0.498315
B genome	7	730.441	384	1766	1.90219	0.413613
D genome	8	612.656	248	1182	2.47039	0.518321
Total	24	1936.59	948	4139	2.04282	0.467888

## Sheet: Table S3
Table S3 Genetic positiong of mapped markers.
Markers	Chromosome	Genetic map (cM)
AX-112289915	1A	0
AX-111015470	1A	11.743
AX-111690299	1A	13.268
AX-86164313	1A	13.268
AX-86164314	1A	13.268
AX-94861968	1A	13.268
AX-86172692	1A	14.756
AX-111252152	1A	14.756
AX-109912673	1A	14.756
AX-86172690	1A	14.756
AX-109398656	1A	15.097
AX-95679112	1A	15.097
AX-95632080	1A	15.097
AX-108809490	1A	15.097
AX-112288902	1A	15.476
AX-110416310	1A	15.736
AX-111132498	1A	15.881
AX-111190232	1A	16.08
AX-110442306	1A	16.08
AX-109852208	1A	16.08
AX-94645762	1A	16.08
AX-108869741	1A	16.08
AX-109889298	1A	16.08
AX-110485993	1A	16.08
AX-108731693	1A	16.08
AX-108893454	1A	17.361
AX-94739433	1A	18.225
AX-111532060	1A	18.225
AX-110064204	1A	18.225
AX-111024764	1A	18.225
AX-108842787	1A	18.225
AX-109032836	1A	18.643
AX-111647090	1A	19.459
AX-110922075	1A	19.459
AX-111619451	1A	19.459
AX-179560436	1A	19.459
AX-110988737	1A	19.459
AX-110689839	1A	19.459
AX-95631971	1A	19.459
AX-109983715	1A	19.459
AX-109326208	1A	19.459
AX-179557788	1A	19.459
AX-110967932	1A	19.924
AX-95198220	1A	20.238
AX-110930532	1A	20.343
AX-179561193	1A	20.525
AX-110906528	1A	20.525
AX-108818535	1A	21.488
AX-95654183	1A	21.488
AX-95095578	1A	21.488
AX-108916271	1A	21.488
AX-110002322	1A	21.488
AX-111263418	1A	21.488
AX-94520045	1A	21.488
AX-111513869	1A	21.488
AX-112288580	1A	21.488
AX-179476721	1A	21.488
AX-86184057	1A	21.488
AX-94631437	1A	21.488
AX-95163067	1A	21.488
AX-110366293	1A	21.488
AX-179557810	1A	21.488
AX-110058881	1A	21.488
AX-110613085	1A	21.488
AX-94434525	1A	21.488
AX-94624330	1A	21.488
AX-95683974	1A	21.488
AX-110439526	1A	21.488
AX-110546253	1A	21.488
AX-179560276	1A	21.488
AX-95661636	1A	21.488
AX-95662086	1A	21.488
AX-95662265	1A	21.488
AX-109006984	1A	21.488
AX-110924002	1A	21.488
AX-95096306	1A	21.488
AX-95170825	1A	21.488
AX-108729517	1A	21.488
AX-109441083	1A	21.488
AX-109460609	1A	21.488
AX-109476107	1A	21.488
AX-109487391	1A	21.488
AX-108798636	1A	21.488
AX-109338066	1A	21.488
AX-109415621	1A	21.488
AX-109630836	1A	21.488
AX-110367274	1A	21.488
AX-111568418	1A	21.488
AX-179561714	1A	21.488
AX-94456108	1A	21.488
AX-95632859	1A	21.488
AX-95658061	1A	21.488
AX-95658497	1A	21.488
AX-95684416	1A	21.488
AX-109610470	1A	21.488
AX-110669824	1A	21.488
AX-111120968	1A	21.488
AX-179557575	1A	21.488
AX-108974862	1A	21.488
AX-109940096	1A	21.488
AX-111503959	1A	21.488
AX-179561685	1A	21.488
AX-110157589	1A	21.488
AX-111457627	1A	21.488
AX-110065421	1A	21.488
AX-110504333	1A	21.488
AX-94521615	1A	21.488
AX-109379649	1A	21.488
AX-109479908	1A	21.488
AX-108893516	1A	21.488
AX-108973273	1A	21.488
AX-109299772	1A	21.488
AX-109398109	1A	21.488
AX-109637483	1A	21.488
AX-111093204	1A	21.488
AX-86185098	1A	21.488
AX-94431963	1A	21.488
AX-109511928	1A	21.488
AX-111044540	1A	21.488
AX-111118849	1A	21.488
AX-111604778	1A	21.488
AX-110481112	1A	21.488
AX-86172808	1A	21.488
AX-94684631	1A	21.488
AX-108855445	1A	21.488
AX-108999030	1A	21.488
AX-111123000	1A	21.488
AX-95630123	1A	21.488
AX-110592405	1A	21.488
AX-110938079	1A	21.488
AX-111811057	1A	21.488
AX-95660246	1A	21.488
AX-111218406	1A	21.488
AX-110574139	1A	21.488
AX-179476578	1A	21.488
AX-110835160	1A	21.488
AX-94594465	1A	21.488
AX-179559034	1A	21.488
AX-111604825	1A	21.488
AX-110175969	1A	21.488
AX-111524633	1A	21.488
AX-95634558	1A	21.488
AX-112286398	1A	21.488
AX-110421810	1A	21.488
AX-95226421	1A	21.488
AX-108750341	1A	21.488
AX-111240271	1A	21.488
AX-111699997	1A	21.488
AX-111607396	1A	21.488
AX-110164804	1A	21.488
AX-111066985	1A	21.488
AX-111549410	1A	21.488
AX-109829012	1A	21.488
AX-111525147	1A	21.488
AX-108889133	1A	21.488
AX-109013490	1A	21.488
AX-110424185	1A	21.488
AX-111577662	1A	22.122
AX-86177879	1A	22.122
AX-110513509	1A	22.122
AX-111223739	1A	22.122
AX-111111612	1A	22.122
AX-111480833	1A	22.122
AX-108797865	1A	22.122
AX-110969943	1A	22.122
AX-108948975	1A	22.122
AX-110455706	1A	22.122
AX-108827668	1A	22.122
AX-109624394	1A	22.122
AX-110174084	1A	22.122
AX-108890616	1A	22.122
AX-111607240	1A	22.122
AX-95182518	1A	22.122
AX-111566945	1A	22.122
AX-109468689	1A	22.122
AX-108869561	1A	22.122
AX-108936390	1A	22.122
AX-109437723	1A	22.122
AX-111168439	1A	22.122
AX-110482380	1A	22.122
AX-89424853	1A	22.122
AX-109824940	1A	22.122
AX-94940429	1A	22.122
AX-110481637	1A	22.122
AX-95629860	1A	22.122
AX-110078647	1A	22.778
AX-110621464	1A	22.778
AX-108943339	1A	22.778
AX-108858579	1A	22.778
AX-86167656	1A	23.136
AX-111535298	1A	23.136
AX-94405126	1A	23.136
AX-111127506	1A	23.833
AX-109533571	1A	23.833
AX-95237226	1A	23.833
AX-95167291	1A	23.833
AX-109032218	1A	23.833
AX-109839840	1A	23.833
AX-109934522	1A	23.833
AX-95658453	1A	23.833
AX-179560959	1A	23.833
AX-95632280	1A	23.833
AX-86178422	1A	23.833
AX-94412593	1A	23.833
AX-110611132	1A	23.833
AX-111775939	1A	23.833
AX-110169096	1A	23.833
AX-108852569	1A	23.833
AX-110570363	1A	23.833
AX-110943762	1A	23.833
AX-111002326	1A	23.833
AX-94406568	1A	23.833
AX-95631434	1A	23.833
AX-109355248	1A	23.833
AX-109925778	1A	23.833
AX-110558039	1A	23.833
AX-94446416	1A	23.833
AX-109040288	1A	23.833
AX-109818943	1A	23.833
AX-110517610	1A	23.833
AX-94962498	1A	23.833
AX-110107892	1A	23.833
AX-95631639	1A	23.833
AX-109870783	1A	23.833
AX-86178423	1A	23.833
AX-110509996	1A	23.833
AX-95089938	1A	23.833
AX-108982129	1A	23.833
AX-109302826	1A	23.833
AX-108880240	1A	23.833
AX-111719607	1A	23.833
AX-95634752	1A	23.833
AX-86163495	1A	23.833
AX-94399186	1A	24.132
AX-108881072	1A	24.132
AX-108764693	1A	24.132
AX-109832482	1A	24.132
AX-95685067	1A	24.132
AX-111531240	1A	24.132
AX-108748978	1A	24.132
AX-108921683	1A	24.132
AX-109968145	1A	24.132
AX-110990436	1A	24.132
AX-111170598	1A	24.132
AX-94912730	1A	24.132
AX-110483667	1A	24.897
AX-108974070	1A	24.897
AX-109277858	1A	24.897
AX-112291160	1A	24.897
AX-111072016	1A	25.014
AX-111629150	1A	25.014
AX-109428393	1A	25.014
AX-109374169	1A	25.014
AX-109972578	1A	25.014
AX-94417411	1A	25.014
AX-95176482	1A	25.014
AX-110408382	1A	25.014
AX-108934237	1A	25.014
AX-108820130	1A	25.21
AX-111632641	1A	26.099
AX-108894614	1A	26.099
AX-95174732	1A	26.099
AX-95684636	1A	26.897
AX-110393879	1A	27.756
AX-108968041	1A	29.015
AX-94608897	1A	29.015
AX-111020377	1A	29.015
AX-86173886	1A	29.015
AX-95633485	1A	29.015
AX-111086674	1A	29.015
AX-94787873	1A	29.015
AX-109368048	1A	29.015
AX-95634131	1A	29.015
AX-95137011	1A	47.381
AX-95630058	1A	47.381
AX-110393779	1A	47.381
AX-109900099	1A	47.381
AX-109458415	1A	47.381
AX-94492604	1A	47.381
AX-178066332	1A	47.381
AX-94726800	1A	47.381
AX-94504454	1A	47.381
AX-109961413	1A	47.737
AX-95660906	1A	47.737
AX-111787913	1A	47.737
AX-110933067	1A	47.737
AX-94584593	1A	47.737
AX-109314207	1A	53.027
AX-111026058	1A	56.391
AX-109350821	1A	56.551
AX-109408584	1A	56.755
AX-109872650	1A	56.755
AX-108856731	1A	57.611
AX-110535605	1A	57.901
AX-108873889	1A	58.007
AX-108933189	1A	58.007
AX-110017150	1A	58.007
AX-110933447	1A	58.007
AX-108973090	1A	58.007
AX-111826929	1A	58.007
AX-111018727	1A	58.286
AX-111480989	1A	59.248
AX-89605342	2A	0
AX-86180346	2A	2.656
AX-95682187	2A	4.053
AX-94959059	2A	4.229
AX-86177801	2A	4.229
AX-94631580	2A	4.229
AX-94652823	2A	4.229
AX-94710291	2A	4.229
AX-94904164	2A	4.229
AX-95096301	2A	4.229
AX-95659426	2A	4.229
AX-108974078	2A	4.229
AX-94914071	2A	4.229
AX-95222604	2A	4.229
AX-95631935	2A	4.229
AX-94398906	2A	4.229
AX-94629608	2A	4.229
AX-94911038	2A	4.229
AX-95630603	2A	4.229
AX-94598642	2A	4.229
AX-94650880	2A	4.229
AX-94934165	2A	4.229
AX-94671978	2A	4.229
AX-95092951	2A	4.229
AX-94979809	2A	4.229
AX-95085901	2A	4.229
AX-95009647	2A	4.229
AX-94643695	2A	4.229
AX-94399171	2A	4.229
AX-94986190	2A	4.229
AX-94507925	2A	4.229
AX-94569525	2A	4.229
AX-94944169	2A	4.229
AX-95188846	2A	4.229
AX-95211013	2A	4.229
AX-94994572	2A	4.229
AX-94978281	2A	4.229
AX-94725754	2A	4.229
AX-94448314	2A	4.229
AX-94670491	2A	4.229
AX-110917900	2A	8.17
AX-95069448	2A	8.17
AX-110498447	2A	17.721
AX-109959449	2A	17.945
AX-109405059	2A	17.945
AX-94818897	2A	20.994
AX-109925910	2A	22.86
AX-111067698	2A	26.172
AX-94998685	2A	26.172
AX-109868110	2A	26.172
AX-94419084	2A	40.901
AX-110607149	2A	44.848
AX-109829484	2A	44.848
AX-110513027	2A	45.076
AX-110417476	2A	45.076
AX-94402591	2A	46.496
AX-110008181	2A	48.108
AX-95684521	2A	52.501
AX-109844516	2A	52.501
AX-179557251	2A	52.501
AX-109437310	2A	52.501
AX-108832455	2A	52.501
AX-179475657	2A	52.501
AX-95630702	2A	52.501
AX-95632103	2A	56.416
AX-95685383	2A	56.416
AX-109295975	2A	56.416
AX-94897794	2A	56.416
AX-89729161	2A	57.15
AX-86170091	2A	58.083
AX-109873869	2A	58.083
AX-94642596	2A	60.292
AX-94674699	2A	60.292
AX-94764260	2A	60.292
AX-95072131	2A	60.292
AX-109280395	2A	60.292
AX-110554146	2A	60.708
AX-109349914	2A	60.708
AX-110919257	2A	60.708
AX-110952137	2A	60.708
AX-108851389	2A	60.708
AX-111508391	2A	60.708
AX-109320001	2A	60.708
AX-111469785	2A	60.708
AX-108826688	2A	60.708
AX-95630638	2A	60.708
AX-109883099	2A	60.708
AX-110130076	2A	60.708
AX-94724654	2A	60.708
AX-111652616	2A	60.708
AX-109396515	2A	60.708
AX-109456438	2A	60.708
AX-110049061	2A	60.708
AX-86184745	2A	60.708
AX-94736936	2A	60.708
AX-95630066	2A	60.708
AX-111055273	2A	60.708
AX-109276307	2A	60.708
AX-111044765	2A	60.708
AX-110390965	2A	60.708
AX-95021241	2A	60.708
AX-109379127	2A	60.708
AX-111006700	2A	60.708
AX-111481942	2A	60.708
AX-108826223	2A	60.708
AX-108852206	2A	61.282
AX-111658893	2A	61.815
AX-111008831	2A	62.398
AX-109303155	2A	62.398
AX-94406628	2A	62.398
AX-108936006	2A	62.468
AX-86178504	2A	63.455
AX-86178702	2A	63.455
AX-95630416	2A	63.455
AX-86178705	2A	63.455
AX-95653135	2A	63.455
AX-86178505	2A	63.455
AX-94423846	2A	63.455
AX-94517432	2A	63.455
AX-95654420	2A	63.455
AX-95659552	2A	63.455
AX-108754990	2A	63.455
AX-179559057	2A	64.62
AX-86184888	2A	65.129
AX-95660056	2A	65.129
AX-95653343	2A	65.129
AX-86178576	2A	65.324
AX-86178577	2A	65.324
AX-89438146	2A	66.174
AX-108914795	2A	66.605
AX-108977253	2A	66.605
AX-94413007	2A	66.848
AX-111550859	2A	66.848
AX-109849622	2A	66.848
AX-110406847	2A	66.848
AX-110458328	2A	69.54
AX-108994918	2A	69.54
AX-109977510	2A	70.338
AX-109447668	2A	70.338
AX-109321357	2A	70.876
AX-89681258	2A	70.876
AX-111655211	2A	70.876
AX-109319457	2A	70.876
AX-109829416	2A	70.932
AX-94504542	2A	73.607
AX-109815521	2A	73.83
AX-86178855	2A	74.354
AX-110683989	2A	82.9
AX-110128227	2A	83.66
AX-110417390	2A	83.66
AX-111014863	2A	83.66
AX-108902945	2A	83.66
AX-111284181	2A	85.782
AX-110671357	2A	87.13
AX-89461172	2A	87.13
AX-110000553	2A	87.13
AX-112286232	2A	87.51
AX-109879502	2A	93.047
AX-111027616	2A	94.13
AX-110061442	2A	94.13
AX-110089538	2A	94.13
AX-111546320	2A	96.644
AX-94754539	2A	97.117
AX-111552328	2A	98.333
AX-109966506	2A	98.333
AX-110375291	3A1	0
AX-94685875	3A1	0.664
AX-108794206	3A1	2.873
AX-109407758	3A1	5.174
AX-108845157	3A1	7.95
AX-111687900	3A1	7.95
AX-109517971	3A1	8.663
AX-111576314	3A1	8.663
AX-109982477	3A1	8.663
AX-108912490	3A1	8.663
AX-111517620	3A1	8.663
AX-111548805	3A1	8.663
AX-108876751	3A1	8.663
AX-108830274	3A1	8.663
AX-111064821	3A1	8.663
AX-108825451	3A1	9.129
AX-109911774	3A1	9.129
AX-109441469	3A1	15.679
AX-111777815	3A1	18.337
AX-110956446	3A1	18.337
AX-108882868	3A1	18.337
AX-179561309	3A2	0
AX-95684039	3A2	0
AX-111129267	3A2	0
AX-86173903	3A2	0
AX-95629227	3A2	0
AX-179561399	3A2	0
AX-179558957	3A2	0
AX-94540502	3A2	0
AX-112286453	3A2	0.943
AX-109973125	3A2	2.28
AX-94430923	3A2	2.28
AX-110078548	3A2	2.28
AX-94520713	3A2	2.28
AX-110522310	3A2	6.691
AX-110983729	3A2	7.202
AX-111547867	3A2	7.202
AX-111551974	3A2	7.202
AX-110594582	3A2	7.202
AX-111122489	3A2	7.202
AX-109919456	3A2	8.095
AX-109992491	3A2	8.095
AX-111477222	3A2	8.095
AX-176645522	3A2	8.095
AX-95632232	3A2	8.095
AX-109943767	3A2	8.095
AX-179560818	3A2	8.095
AX-109583073	3A2	8.095
AX-86173833	3A2	8.095
AX-111694172	3A2	8.095
AX-94798864	3A2	8.095
AX-110594869	3A2	8.095
AX-108834095	3A2	8.095
AX-110145693	3A2	8.095
AX-86175820	3A2	8.095
AX-110394952	3A2	8.095
AX-95632194	3A2	8.095
AX-110917228	3A2	8.095
AX-94565139	3A2	8.095
AX-111077899	3A2	8.095
AX-111052323	3A2	8.095
AX-109997099	3A2	8.095
AX-94935938	3A2	8.095
AX-111007220	3A2	8.095
AX-108825995	3A2	8.095
AX-110420574	3A2	8.095
AX-179558043	3A2	8.095
AX-111460264	3A2	10.628
AX-110602564	3A2	10.628
AX-108782839	3A2	10.628
AX-110395356	3A2	10.628
AX-108746573	3A2	10.628
AX-95632294	3A2	10.628
AX-111133023	3A2	10.628
AX-110493072	3A2	10.628
AX-111044071	3A2	10.628
AX-111602060	3A2	10.628
AX-179557644	3A2	10.628
AX-110379437	3A2	10.628
AX-95685005	3A2	10.628
AX-110614973	3A2	10.628
AX-108789352	3A2	10.628
AX-110484185	3A2	10.628
AX-95654245	3A2	10.628
AX-110363817	3A2	10.628
AX-109469542	3A2	10.628
AX-109582126	3A2	10.628
AX-108843805	3A2	10.628
AX-110944642	3A2	10.628
AX-111590061	3A2	10.628
AX-86166819	3A2	10.628
AX-111503119	3A2	10.628
AX-111126303	3A2	10.628
AX-108783829	3A2	10.628
AX-112286113	3A2	10.628
AX-179560711	3A2	10.628
AX-112289757	3A2	10.628
AX-94661464	3A2	10.628
AX-95685189	3A2	10.628
AX-179559384	3A2	10.628
AX-95679679	3A2	11.781
AX-95632059	3A2	12.423
AX-95186684	3A2	12.423
AX-110377908	3A2	12.784
AX-111012045	3A2	12.784
AX-109488628	3A2	12.784
AX-108832110	3A2	12.784
AX-110596624	3A2	12.784
AX-111703137	3A2	12.784
AX-109332225	3A2	12.784
AX-109912577	3A2	13.34
AX-110420972	3A2	13.34
AX-94432880	3A2	13.34
AX-110435718	3A2	13.34
AX-89412635	3A2	13.34
AX-94460136	3A2	13.34
AX-95101892	3A2	13.34
AX-95660867	3A2	13.34
AX-109008434	3A2	13.34
AX-86179924	3A2	13.34
AX-94545557	3A2	13.34
AX-111067687	3A2	13.34
AX-110391586	3A2	13.34
AX-95683994	3A2	13.34
AX-95630709	3A2	13.34
AX-109278839	3A2	13.34
AX-109399879	3A2	13.34
AX-110626946	3A2	13.34
AX-111019634	3A2	13.34
AX-94596122	3A2	13.34
AX-94519536	3A2	13.34
AX-86176417	3A2	13.34
AX-108741037	3A2	13.34
AX-179561296	3A2	13.34
AX-109991769	3A2	13.34
AX-179558913	3A2	15.954
AX-95658502	3A2	15.954
AX-109366295	3A2	18.558
AX-111541125	3A2	37.556
AX-109355601	3A2	41.354
AX-110949876	3A2	41.354
AX-109344781	3A2	41.354
AX-110363397	3A2	41.354
AX-110093673	3A2	41.354
AX-109294228	3A2	41.354
AX-110483079	3A2	41.354
AX-111473527	3A2	41.354
AX-94409394	4A	0
AX-111578911	4A	1.759
AX-111494558	4A	4.678
AX-108884861	4A	8.016
AX-179558087	4A	10.907
AX-95631668	4A	11.236
AX-112288579	4A	28.401
AX-110495553	4A	28.401
AX-112288645	4A	29.087
AX-179561417	4A	29.087
AX-94400142	4A	29.881
AX-112287531	4A	29.881
AX-94407690	4A	30.776
AX-94859081	4A	30.776
AX-179476789	4A	30.776
AX-108836622	4A	32.73
AX-86173802	4A	32.73
AX-94390104	4A	32.73
AX-94662401	4A	33.046
AX-109303147	4A	33.046
AX-109570845	4A	35.495
AX-111732252	4A	35.495
AX-108865501	4A	35.495
AX-108909164	4A	35.638
AX-109031111	4A	35.638
AX-110934397	4A	37.881
AX-95628936	4A	37.881
AX-110471504	4A	37.881
AX-111525226	4A	37.881
AX-111654872	4A	41.993
AX-86166893	4A	45.234
AX-86166894	4A	45.234
AX-95108463	4A	46.277
AX-94450390	4A	46.945
AX-89512073	4A	49.462
AX-109941459	4A	50.124
AX-108997233	4A	50.124
AX-95068958	4A	52.873
AX-111692316	4A	53.362
AX-89408533	4A	55.26
AX-109987425	4A	55.26
AX-110394365	4A	55.26
AX-112286181	4A	55.886
AX-94601848	4A	55.886
AX-94544185	4A	55.886
AX-94587685	4A	56.488
AX-95630057	4A	56.488
AX-179560323	4A	57.377
AX-109447217	4A	58.762
AX-109624607	4A	58.762
AX-111058734	4A	60.341
AX-111522430	4A	60.719
AX-95630350	4A	60.719
AX-109558533	4A	62.244
AX-109959415	4A	62.468
AX-108854283	4A	62.468
AX-111776748	4A	62.468
AX-109429270	4A	62.675
AX-111151933	4A	62.858
AX-94518705	4A	62.994
AX-111654816	4A	63.407
AX-109582340	4A	63.662
AX-109344169	4A	63.662
AX-110413881	4A	63.662
AX-109821713	4A	63.662
AX-109343035	4A	63.662
AX-108789385	4A	63.868
AX-95658150	4A	64.05
AX-109413728	4A	64.05
AX-110034906	4A	64.05
AX-110508150	4A	64.05
AX-110649064	4A	64.45
AX-109272432	4A	65.256
AX-176653526	4A	65.256
AX-109872231	4A	65.256
AX-109012587	4A	65.256
AX-108834936	4A	65.256
AX-95179478	4A	65.874
AX-111526124	4A	65.874
AX-108781787	4A	65.874
AX-111469656	4A	66.121
AX-110637287	4A	66.316
AX-110449014	4A	66.316
AX-110513579	4A	66.527
AX-111722547	4A	66.527
AX-111499614	4A	66.778
AX-110570010	4A	66.778
AX-110989658	4A	66.778
AX-110547981	4A	66.778
AX-111047466	4A	66.918
AX-109466409	4A	67.575
AX-110908322	4A	67.575
AX-109405914	4A	67.575
AX-111764512	4A	67.575
AX-94767736	4A	67.575
AX-111216973	4A	67.575
AX-110478455	4A	67.917
AX-109033879	4A	68.011
AX-111615703	4A	68.011
AX-89333634	4A	69.317
AX-110450863	4A	69.317
AX-108779513	4A	69.657
AX-109445617	4A	70.105
AX-108942399	4A	70.772
AX-109396037	4A	70.772
AX-111506070	4A	71.242
AX-110988252	4A	71.738
AX-110951661	4A	72.469
AX-111624592	4A	72.469
AX-111088719	4A	72.469
AX-109343545	4A	72.469
AX-110197159	4A	72.469
AX-110455899	4A	72.469
AX-110980515	4A	72.733
AX-89312523	4A	72.733
AX-110993003	4A	72.733
AX-110591040	4A	74.282
AX-111142236	4A	76.235
AX-110657073	4A	76.648
AX-110017693	4A	77.014
AX-95182838	4A	77.014
AX-111518363	4A	77.014
AX-111007658	4A	82.039
AX-94469815	4A	82.039
AX-111158819	5A1	0
AX-108839873	5A1	2.38
AX-95684258	5A1	7.134
AX-94406550	5A1	13.934
AX-179561159	5A1	17.454
AX-94441001	5A1	17.454
AX-94618056	5A1	17.454
AX-94777828	5A1	17.454
AX-94935882	5A1	17.454
AX-94450105	5A1	17.454
AX-95685101	5A1	17.454
AX-109411291	5A1	17.955
AX-110533982	5A1	34.709
AX-95631666	5A1	34.709
AX-94566370	5A1	34.709
AX-110960933	5A1	34.709
AX-109357534	5A1	34.709
AX-95628908	5A1	34.709
AX-179559072	5A1	34.709
AX-95631280	5A1	34.709
AX-109578838	5A1	36.966
AX-94382012	5A1	38.832
AX-95630073	5A1	38.832
AX-109819799	5A1	39.475
AX-95658844	5A1	52.849
AX-86177927	5A1	57.912
AX-109353805	5A1	57.912
AX-110416548	5A1	58.153
AX-109035929	5A1	58.4
AX-111002817	5A1	58.4
AX-111057455	5A1	58.4
AX-109842579	5A1	58.4
AX-94479809	5A1	58.4
AX-109430223	5A1	58.4
AX-109622352	5A1	58.4
AX-111521631	5A1	61.284
AX-110142326	5A1	61.284
AX-110985623	5A1	61.284
AX-111449650	5A1	61.284
AX-111466243	5A1	61.695
AX-111574487	5A1	61.695
AX-111187014	5A1	61.695
AX-110391427	5A1	61.695
AX-110365523	5A1	61.695
AX-110060057	5A1	61.695
AX-110997238	5A1	61.695
AX-111149067	5A1	61.695
AX-110975508	5A1	61.695
AX-109620371	5A1	64.715
AX-111004468	5A1	64.715
AX-108946693	5A1	64.715
AX-110418098	5A1	67.839
AX-111600246	5A1	68.521
AX-111174450	5A1	68.521
AX-111700829	5A1	68.521
AX-109461662	5A1	68.521
AX-111083042	5A1	68.521
AX-111768994	5A1	68.521
AX-109972771	5A1	68.521
AX-111717358	5A1	68.521
AX-108899760	5A1	68.521
AX-110946897	5A1	68.521
AX-109452674	5A1	68.521
AX-111483472	5A1	70.958
AX-94638131	5A1	71.287
AX-94955528	5A1	71.287
AX-111798849	5A1	71.287
AX-109511251	5A1	71.287
AX-94430148	5A1	72.683
AX-109966154	5A1	79.286
AX-109919444	5A1	80.818
AX-89396166	5A1	83.083
AX-108738850	5A1	83.083
AX-108767097	5A1	86.649
AX-109847354	5A1	88.651
AX-94386305	5A1	88.651
AX-111476321	5A1	88.651
AX-109403337	5A1	92.004
AX-110374026	5A1	92.004
AX-109385531	5A1	92.004
AX-109890238	5A1	92.004
AX-94405132	5A1	92.004
AX-109340261	5A1	92.004
AX-95100623	5A1	92.004
AX-111504683	5A1	92.004
AX-110950653	5A1	92.004
AX-109397603	5A1	92.469
AX-110995304	5A1	92.469
AX-94922413	5A1	92.469
AX-95630232	5A1	96.162
AX-95631051	5A1	96.162
AX-111545805	5A1	96.162
AX-179557702	5A1	96.162
AX-94589819	5A1	101.323
AX-108867690	5A1	102.642
AX-111459985	5A1	103.75
AX-109312210	5A1	104.738
AX-110479303	5A1	105.477
AX-111089755	5A1	106.271
AX-86178865	5A1	106.579
AX-110099478	5A1	106.579
AX-89463970	5A1	107.231
AX-109830322	5A1	107.594
AX-109411991	5A1	108.417
AX-110505867	5A1	108.908
AX-108805233	5A1	108.988
AX-95632161	5A1	109.218
AX-108928083	5A1	110.57
AX-109379385	5A1	110.881
AX-109454291	5A1	110.881
AX-110950840	5A1	110.881
AX-111129408	5A1	110.881
AX-109467939	5A1	110.881
AX-111603496	5A1	110.881
AX-108756620	5A1	110.881
AX-86163375	5A1	110.881
AX-110496361	5A1	110.881
AX-108880731	5A1	110.881
AX-110023454	5A1	110.881
AX-111668084	5A1	110.881
AX-110618351	5A1	110.881
AX-111550203	5A1	110.881
AX-94669612	5A1	112.763
AX-94531685	5A1	112.763
AX-94520807	5A1	112.763
AX-110169414	5A1	113.288
AX-109899443	5A1	113.748
AX-110908033	5A1	114.122
AX-86183899	5A1	114.122
AX-86174919	5A1	114.122
AX-179559267	5A1	114.122
AX-108727324	5A1	114.453
AX-110920240	5A1	114.453
AX-111799065	5A1	115.905
AX-108885010	5A2	0
AX-109941570	5A2	0
AX-109983844	5A2	0.619
AX-108809340	5A2	1.424
AX-109540933	5A2	1.424
AX-95207748	5A2	1.424
AX-109924491	5A2	1.424
AX-110372269	5A2	1.424
AX-109898016	5A2	1.424
AX-110546974	5A2	1.424
AX-110944026	5A2	1.424
AX-110974148	5A2	1.424
AX-108901604	5A2	1.424
AX-111264181	5A2	1.424
AX-111824969	5A2	1.424
AX-110504776	5A2	1.424
AX-111539553	5A2	1.424
AX-179388074	5A2	1.424
AX-109937920	5A2	1.424
AX-111561526	5A2	1.424
AX-86180043	5A2	12.456
AX-86180044	5A2	12.456
AX-109829087	5A2	14.132
AX-110366055	5A2	19.374
AX-110039986	5A2	19.374
AX-110513721	5A2	19.374
AX-109936055	5A2	19.374
AX-108841395	5A2	19.374
AX-110937902	5A2	19.374
AX-111710031	5A2	19.374
AX-110683785	5A2	19.374
AX-108811182	5A2	20.299
AX-95111244	5A2	21.207
AX-110548980	5A2	23.375
AX-111282277	5A2	23.681
AX-111741946	5A2	23.681
AX-111560225	5A2	23.681
AX-109844444	5A2	23.681
AX-110980485	5A2	23.681
AX-110584136	5A2	23.681
AX-109291900	5A2	23.681
AX-94525543	5A2	23.681
AX-111581920	5A2	23.681
AX-109504625	5A2	23.681
AX-108821689	5A2	25.154
AX-108953917	5A2	25.154
AX-94506461	6A	0
AX-112288775	6A	0
AX-179476089	6A	0
AX-179475898	6A	4.14
AX-179560538	6A	4.14
AX-86168860	6A	4.14
AX-110620231	6A	4.14
AX-111706410	6A	4.14
AX-94993481	6A	4.14
AX-111077991	6A	4.881
AX-94966145	6A	4.881
AX-179558127	6A	4.881
AX-108745027	6A	4.881
AX-109856637	6A	4.881
AX-95659344	6A	4.881
AX-94800842	6A	5.513
AX-94653398	6A	6.075
AX-94970334	6A	9.759
AX-110067102	6A	9.759
AX-94634533	6A	9.759
AX-109856730	6A	15.853
AX-109306991	6A	24.473
AX-109353827	6A	24.473
AX-95630647	6A	24.473
AX-111137160	6A	24.473
AX-111149786	6A	24.473
AX-110528741	6A	24.473
AX-108884524	6A	24.473
AX-179476814	6A	25.125
AX-110009072	6A	25.596
AX-94601335	6A	31.632
AX-179558821	6A	32.683
AX-108927138	6A	32.683
AX-95630469	6A	33.727
AX-109903535	6A	33.727
AX-111221729	6A	33.727
AX-111806104	6A	33.727
AX-108783647	6A	33.727
AX-109606147	6A	33.727
AX-109970551	6A	33.727
AX-111249828	6A	33.727
AX-110397271	6A	33.727
AX-95629422	6A	36.425
AX-86172919	6A	36.425
AX-109380065	6A	36.425
AX-95658627	6A	36.425
AX-110585473	6A	36.425
AX-109838705	6A	36.425
AX-108826255	6A	36.64
AX-109926578	6A	37.038
AX-109369051	6A	37.038
AX-111557648	6A	37.038
AX-108832868	6A	37.038
AX-108866861	6A	37.038
AX-108873533	6A	37.038
AX-109035263	6A	37.038
AX-110996156	6A	37.038
AX-111129045	6A	37.038
AX-94410820	6A	37.038
AX-110510229	6A	37.038
AX-110985951	6A	37.038
AX-110067051	6A	37.038
AX-109473841	6A	37.038
AX-110095199	6A	37.038
AX-111232648	6A	37.038
AX-109953467	6A	37.038
AX-94495198	6A	37.038
AX-94679268	6A	37.038
AX-111476658	6A	37.452
AX-109844821	6A	38.966
AX-110609622	6A	47.848
AX-109952070	6A	52.321
AX-179475713	6A	54.365
AX-89515423	6A	54.365
AX-94499400	6A	54.365
AX-95659847	6A	54.365
AX-95661524	6A	55.196
AX-89397633	7A	0
AX-179561266	7A	2.349
AX-111520161	7A	3.986
AX-94649423	7A	3.986
AX-111537329	7A	6.494
AX-109867075	7A	6.494
AX-108968319	7A	13.766
AX-110371615	7A	13.766
AX-94761033	7A	13.766
AX-95631948	7A	13.766
AX-111651967	7A	13.766
AX-108756505	7A	13.766
AX-94419332	7A	13.766
AX-176651320	7A	13.766
AX-108867840	7A	14.815
AX-109851276	7A	14.815
AX-111087410	7A	14.815
AX-94561800	7A	14.815
AX-110058146	7A	14.815
AX-109825918	7A	14.815
AX-95119818	7A	14.815
AX-111642244	7A	14.815
AX-110445242	7A	14.815
AX-110580997	7A	14.815
AX-110026864	7A	14.815
AX-110371420	7A	14.815
AX-179477012	7A	14.815
AX-94830453	7A	14.815
AX-111218466	7A	14.815
AX-109487059	7A	14.815
AX-94460113	7A	14.815
AX-179559249	7A	14.815
AX-95653161	7A	14.815
AX-109329804	7A	14.815
AX-95659279	7A	14.815
AX-86178106	7A	17.461
AX-109950970	7A	19.552
AX-110440224	7A	19.605
AX-111589099	7A	19.605
AX-110001291	7A	19.605
AX-108763073	7A	19.605
AX-109422440	7A	19.605
AX-109503299	7A	19.843
AX-110041691	7A	19.843
AX-109521863	7A	19.843
AX-112287663	7A	19.843
AX-111762270	7A	19.843
AX-110506911	7A	19.843
AX-95630649	7A	20.089
AX-95091707	7A	20.089
AX-109306484	7A	20.401
AX-111598267	7A	20.585
AX-109873881	7A	20.585
AX-110441935	7A	20.585
AX-110447055	7A	20.585
AX-109496371	7A	20.585
AX-94951482	7A	20.585
AX-95629789	7A	20.585
AX-94444443	7A	20.962
AX-95211909	7A	20.962
AX-179476312	7A	20.962
AX-109499552	7A	20.962
AX-86174437	7A	21.163
AX-109436688	7A	21.163
AX-109500366	7A	21.163
AX-110993737	7A	21.894
AX-86165417	7A	22.347
AX-109879599	7A	22.347
AX-86163938	7A	22.347
AX-95629124	7A	22.347
AX-179558091	7A	22.849
AX-95239734	7A	24.055
AX-179561137	7A	24.055
AX-94524579	7A	24.055
AX-95659364	7A	24.055
AX-179476498	7A	24.055
AX-95658022	7A	24.055
AX-95177409	7A	24.5
AX-94535557	7A	24.5
AX-111033006	7A	24.5
AX-95685129	7A	24.921
AX-95631991	7A	29.79
AX-179560473	7A	29.79
AX-95185736	7A	30.165
AX-109363221	7A	30.165
AX-109968851	7A	30.165
AX-110364312	7A	30.165
AX-110676221	7A	30.165
AX-111715341	7A	30.165
AX-110022066	7A	30.165
AX-111552847	7A	30.165
AX-94765734	7A	30.165
AX-94959051	7A	30.165
AX-95681388	7A	30.165
AX-109313220	7A	30.165
AX-109286613	7A	30.165
AX-94518364	7A	30.165
AX-94386429	7A	30.165
AX-86177720	7A	30.165
AX-111487691	7A	30.42
AX-111238272	7A	30.42
AX-95658182	7A	30.42
AX-178063503	7A	30.42
AX-110627601	7A	30.42
AX-179475712	7A	30.42
AX-179558323	7A	30.42
AX-109273554	7A	30.42
AX-95633774	7A	30.42
AX-111803090	7A	30.42
AX-95684514	7A	30.42
AX-95095444	7A	30.42
AX-111625381	7A	30.542
AX-94451998	7A	30.542
AX-108899325	7A	30.56
AX-111526600	7A	30.56
AX-109994960	7A	30.56
AX-111103107	7A	30.762
AX-110584732	7A	30.762
AX-108849227	7A	30.762
AX-94727274	7A	30.762
AX-94386178	7A	30.902
AX-94800607	7A	30.902
AX-95634196	7A	30.902
AX-111825207	7A	30.902
AX-111534083	7A	30.902
AX-95140773	7A	31.219
AX-94462877	7A	31.219
AX-111558895	7A	31.666
AX-112290195	7A	32.66
AX-111576106	7A	41.89
AX-111589984	7A	41.89
AX-111462166	7A	41.89
AX-95658171	7A	41.89
AX-110983203	7A	42.377
AX-111121870	7A	42.377
AX-95629663	7A	44.241
AX-94480381	7A	44.241
AX-108844278	7A	45.251
AX-110979428	7A	46.837
AX-179558461	7A	61.792
AX-179558462	7A	61.792
AX-94523052	7A	62.452
AX-110541561	7A	63.072
AX-110046077	7A	63.072
AX-110026804	7A	63.072
AX-109946700	7A	63.072
AX-109983129	7A	63.072
AX-111167046	7A	63.804
AX-110555291	7A	66.286
AX-111103566	7A	66.286
AX-109918254	7A	66.414
AX-86164739	7A	67.398
AX-109934114	7A	67.398
AX-109423906	7A	67.398
AX-110454514	7A	67.398
AX-111610851	7A	67.398
AX-108791215	7A	67.398
AX-110696985	7A	68.537
AX-109466255	7A	68.537
AX-110378231	7A	68.537
AX-110541056	7A	68.537
AX-109974213	7A	68.537
AX-89353175	7A	75.331
AX-110523034	7A	75.331
AX-109889341	7A	75.331
AX-109998893	7A	75.331
AX-109961435	7A	76.005
AX-110932491	7A	77.108
AX-109505648	7A	77.108
AX-109308927	7A	77.108
AX-110928972	7A	80.172
AX-111033260	7A	80.893
AX-179558312	7A	81.571
AX-95630145	7A	81.571
AX-112287708	7A	81.571
AX-179559858	7A	81.571
AX-94645322	7A	87.715
AX-111572279	7A	96.795
AX-108892427	7A	96.795
AX-111675883	7A	96.795
AX-108923652	7A	96.795
AX-109444230	7A	96.795
AX-108985268	7A	96.795
AX-109351745	7A	96.795
AX-110453189	7A	96.795
AX-109453132	7A	96.795
AX-111003307	7A	96.795
AX-110996516	7A	97.111
AX-111168101	7A	99.861
AX-95094419	7A	99.861
AX-112290879	7A	99.861
AX-94554795	7A	99.861
AX-179559087	7A	99.861
AX-179561387	7A	99.861
AX-95629209	7A	99.861
AX-179476411	7A	101.116
AX-94642563	1B	0
AX-95078610	1B	5.59
AX-94466051	1B	9.013
AX-94741250	1B	13.322
AX-179557887	1B	14.809
AX-95630598	1B	14.809
AX-86173480	1B	17.566
AX-86173481	1B	17.566
AX-94441727	1B	18.656
AX-95202964	1B	19.926
AX-94833199	1B	21.992
AX-95190390	1B	21.992
AX-94921195	1B	21.992
AX-95121543	1B	22.96
AX-179560668	1B	24.486
AX-94823004	1B	24.486
AX-109332775	1B	24.486
AX-94990715	1B	25.892
AX-95211457	1B	27.855
AX-94800485	1B	27.855
AX-94537736	1B	27.855
AX-86172163	1B	27.855
AX-95022601	1B	27.855
AX-94592332	1B	27.855
AX-94861978	1B	28.135
AX-179558890	1B	28.135
AX-179558065	1B	28.135
AX-94445103	1B	28.135
AX-94688419	1B	28.135
AX-94544160	1B	28.135
AX-94764152	1B	28.135
AX-94937006	1B	28.135
AX-179558535	1B	28.135
AX-94708736	1B	28.135
AX-89589255	1B	28.697
AX-94575523	1B	29.571
AX-109372585	1B	30.841
AX-89457882	1B	30.841
AX-111209012	1B	30.841
AX-179559897	1B	30.841
AX-108923570	1B	30.841
AX-86179683	1B	30.841
AX-94766574	1B	30.841
AX-94503095	1B	30.841
AX-112287115	1B	30.841
AX-109942451	1B	37.389
AX-111128656	1B	37.756
AX-111681185	1B	38.376
AX-94505885	1B	38.376
AX-95631820	1B	38.376
AX-86173362	1B	38.767
AX-89316986	1B	38.767
AX-111521133	1B	38.767
AX-86173364	1B	38.767
AX-110372010	1B	39.359
AX-110514958	1B	39.359
AX-108891924	1B	39.359
AX-108801883	1B	39.359
AX-110073901	1B	39.359
AX-111010821	1B	39.905
AX-89462777	1B	39.905
AX-89483450	1B	40.678
AX-94479851	1B	41.162
AX-179559489	1B	41.596
AX-110923601	1B	41.596
AX-111136119	1B	41.596
AX-109000276	1B	41.596
AX-110053656	1B	41.596
AX-111510885	1B	41.596
AX-86164290	1B	41.596
AX-86180211	1B	41.596
AX-111041836	1B	41.596
AX-111095608	1B	41.596
AX-111460054	1B	41.596
AX-94439461	1B	41.596
AX-109356288	1B	41.596
AX-110087497	1B	41.596
AX-109964533	1B	41.596
AX-179561396	1B	41.596
AX-94487937	1B	41.596
AX-110927649	1B	41.596
AX-110921309	1B	41.596
AX-110607797	1B	41.973
AX-109449137	1B	42.767
AX-111647403	1B	43.372
AX-111170603	1B	43.372
AX-110624820	1B	43.372
AX-179560988	1B	44.492
AX-95632122	1B	44.492
AX-110694508	1B	45.049
AX-109454245	1B	45.049
AX-110199616	1B	45.049
AX-109541457	1B	45.049
AX-108918947	1B	45.499
AX-111472741	1B	45.499
AX-110630113	1B	45.499
AX-110149391	1B	45.499
AX-110438060	1B	45.499
AX-108816508	1B	45.499
AX-110579773	1B	45.499
AX-111454293	1B	45.499
AX-108736319	1B	45.499
AX-111756857	1B	45.499
AX-94940498	1B	45.499
AX-111630780	1B	45.499
AX-179559405	1B	45.499
AX-109348975	1B	45.499
AX-108849862	1B	45.499
AX-111471528	1B	45.499
AX-94546432	1B	45.499
AX-110123275	1B	45.499
AX-111509254	1B	46.225
AX-108777680	1B	46.225
AX-111486292	1B	46.225
AX-95190085	1B	46.225
AX-109365707	1B	46.225
AX-110475885	1B	46.225
AX-111083434	1B	46.225
AX-111646912	1B	46.225
AX-86175690	1B	46.225
AX-95683806	1B	46.225
AX-108767621	1B	46.225
AX-95206874	1B	46.225
AX-110940387	1B	46.225
AX-111286591	1B	46.225
AX-111165373	1B	46.225
AX-86164877	1B	46.225
AX-94514811	1B	46.225
AX-86172038	1B	46.538
AX-94454534	1B	46.538
AX-86172039	1B	46.538
AX-111073378	1B	46.538
AX-108898960	1B	46.538
AX-109310583	1B	46.538
AX-94692952	1B	46.538
AX-110393734	1B	46.538
AX-95115833	1B	46.538
AX-111506135	1B	46.538
AX-111667889	1B	46.538
AX-112287289	1B	46.538
AX-86175582	1B	46.538
AX-108991772	1B	46.538
AX-95659643	1B	46.538
AX-108726972	1B	46.538
AX-111697985	1B	46.538
AX-94829509	1B	46.538
AX-110923096	1B	46.538
AX-179560459	1B	46.538
AX-94532894	1B	46.538
AX-110941112	1B	46.826
AX-109922547	1B	46.826
AX-108918921	1B	46.826
AX-110533435	1B	46.826
AX-109896185	1B	46.826
AX-94490809	1B	46.826
AX-94864530	1B	47.308
AX-94499416	1B	47.811
AX-109956883	1B	48.608
AX-110028315	1B	48.608
AX-89352458	1B	48.608
AX-108791112	1B	48.608
AX-94995102	1B	48.608
AX-110378973	1B	48.608
AX-179475732	1B	48.608
AX-108865543	1B	50.087
AX-108918014	1B	50.087
AX-111540876	1B	50.087
AX-89347943	1B	50.465
AX-94960187	1B	50.465
AX-179560819	1B	50.465
AX-109444731	1B	50.651
AX-111044282	1B	50.872
AX-108850875	1B	50.872
AX-108927977	1B	50.872
AX-95632162	1B	50.872
AX-109396077	1B	50.872
AX-95658965	1B	50.872
AX-111662852	1B	50.872
AX-95630762	1B	50.872
AX-95658683	1B	50.872
AX-108984254	1B	50.872
AX-110558603	1B	50.872
AX-112290773	1B	50.872
AX-108906182	1B	50.872
AX-108838031	1B	51.279
AX-109993453	1B	51.279
AX-89440548	1B	51.279
AX-108763842	1B	51.279
AX-111601677	1B	51.279
AX-111540441	1B	51.279
AX-110531671	1B	51.279
AX-86167354	1B	52.857
AX-94843973	1B	52.857
AX-176653286	1B	54.486
AX-95628868	1B	54.486
AX-112286647	1B	56
AX-109815012	1B	56
AX-86179450	1B	60.698
AX-95685240	1B	71.597
AX-94772153	1B	71.597
AX-94793167	1B	71.597
AX-110918755	1B	74.899
AX-110581406	1B	74.899
AX-111062649	1B	74.899
AX-109372293	1B	80.661
AX-109100167	1B	80.661
AX-111498627	1B	80.661
AX-108867961	1B	80.661
AX-111566676	1B	80.661
AX-111002968	1B	80.661
AX-109496145	1B	80.661
AX-86178999	1B	83.076
AX-111602632	1B	83.076
AX-95659874	1B	83.076
AX-94716273	1B	83.076
AX-95660482	1B	83.076
AX-111642604	1B	84.751
AX-95658863	1B	84.751
AX-179475876	1B	84.751
AX-110941669	1B	85.183
AX-112288501	1B	86.067
AX-94425292	1B	86.067
AX-111559953	1B	86.067
AX-111611971	1B	87.926
AX-110926585	2B	0
AX-109454545	2B	0
AX-109848481	2B	0
AX-94480511	2B	0
AX-95628920	2B	7.779
AX-178075227	2B	7.779
AX-179561600	2B	7.779
AX-95684440	2B	7.779
AX-109470204	2B	12.488
AX-94870786	2B	24.952
AX-95153371	2B	24.952
AX-95681602	2B	28.094
AX-86178915	2B	28.094
AX-94508950	2B	29.106
AX-110593040	2B	35.431
AX-108730087	2B	40.378
AX-179561157	2B	43.386
AX-94437036	2B	43.386
AX-95241363	2B	43.386
AX-108739838	2B	44.709
AX-86179354	2B	46.172
AX-108747746	2B	46.172
AX-110389401	2B	46.172
AX-111534474	2B	46.172
AX-109299564	2B	46.172
AX-110447950	2B	46.172
AX-95214701	2B	46.172
AX-95658702	2B	46.172
AX-109862405	2B	64.304
AX-86164309	2B	64.304
AX-86164310	2B	64.304
AX-94389260	2B	64.304
AX-95683860	2B	64.863
AX-94499577	2B	64.863
AX-179560058	2B	64.863
AX-94755547	2B	64.863
AX-111043202	2B	64.863
AX-179560057	2B	64.863
AX-94472212	2B	67.427
AX-95008467	2B	67.644
AX-94648480	2B	67.644
AX-108893530	2B	68.108
AX-109459640	2B	68.347
AX-110524499	2B	68.347
AX-94506151	2B	68.347
AX-108775172	2B	68.888
AX-94656410	2B	68.888
AX-111667078	2B	68.888
AX-94769513	2B	68.888
AX-111080023	2B	68.888
AX-110648479	2B	68.985
AX-108974675	2B	69.231
AX-95684235	2B	69.844
AX-86173633	2B	70.462
AX-110489945	2B	77.349
AX-110003371	2B	77.349
AX-110614356	2B	77.349
AX-111175275	2B	80.175
AX-179557321	2B	92.913
AX-110962690	2B	92.913
AX-111250743	2B	94.467
AX-111661669	2B	94.467
AX-94680690	2B	94.467
AX-95189827	2B	94.467
AX-178062146	2B	94.467
AX-95087628	2B	94.467
AX-179558581	2B	94.467
AX-94979731	2B	94.467
AX-110988946	2B	94.467
AX-86173489	2B	97.02
AX-111611539	2B	97.02
AX-95658295	2B	97.336
AX-111460646	2B	97.336
AX-95219673	2B	97.592
AX-110942863	2B	105.525
AX-95654670	2B	106.592
AX-95134990	2B	108.881
AX-94623285	2B	108.881
AX-94848091	2B	121.641
AX-94453359	2B	126.656
AX-94624570	3B	0
AX-94413646	3B	0
AX-110984638	3B	0
AX-95630090	3B	0
AX-109543337	3B	7.869
AX-111080504	3B	7.869
AX-89559347	3B	7.869
AX-111577878	3B	8.578
AX-109818685	3B	8.578
AX-109849800	3B	8.578
AX-89690294	3B	8.578
AX-110667739	3B	8.578
AX-109488169	3B	9.149
AX-111111941	3B	9.609
AX-109289767	3B	9.609
AX-179559620	3B	12.172
AX-112289470	3B	12.172
AX-95201874	3B	12.172
AX-111651783	3B	12.533
AX-109844104	3B	15.382
AX-110578998	3B	28.383
AX-110407468	3B	28.383
AX-109293742	3B	28.383
AX-94496337	3B	28.383
AX-109296675	3B	28.383
AX-110584553	3B	28.383
AX-108883166	3B	28.873
AX-111062508	3B	28.873
AX-95684249	3B	28.873
AX-110520630	3B	28.873
AX-109952325	3B	28.873
AX-110951813	3B	28.873
AX-111065102	3B	28.873
AX-108958647	3B	28.873
AX-110408547	3B	28.873
AX-94493774	3B	28.873
AX-109473937	3B	28.873
AX-158558049	3B	28.873
AX-109074927	3B	28.873
AX-109823028	3B	28.873
AX-111143584	3B	28.873
AX-95631323	3B	28.873
AX-95205808	3B	28.873
AX-111147382	3B	28.873
AX-179560437	3B	28.873
AX-111497972	3B	28.873
AX-108949577	3B	29.426
AX-109826560	3B	29.426
AX-111656145	3B	29.426
AX-110573459	3B	29.426
AX-109617554	3B	29.426
AX-110125290	3B	29.426
AX-111014209	3B	32.698
AX-111609191	3B	32.698
AX-109095758	3B	32.698
AX-110612393	3B	32.698
AX-110603605	3B	32.698
AX-111459972	3B	32.985
AX-94395028	3B	33.332
AX-94419046	3B	33.332
AX-108933842	3B	33.332
AX-110656975	3B	33.332
AX-111234034	3B	33.332
AX-110471397	3B	33.332
AX-110147189	3B	33.332
AX-108810380	3B	33.332
AX-111105340	3B	33.332
AX-110020038	3B	33.332
AX-110045426	3B	33.332
AX-110549989	3B	33.332
AX-111117411	3B	33.332
AX-111135103	3B	33.332
AX-111543225	3B	33.332
AX-108983083	3B	33.332
AX-109291778	3B	33.332
AX-94388554	3B	33.332
AX-109051695	3B	33.332
AX-111012076	3B	33.332
AX-111515250	3B	33.332
AX-108955091	3B	33.332
AX-111646020	3B	33.332
AX-110525652	3B	33.332
AX-110557037	3B	33.332
AX-111581434	3B	33.332
AX-111765909	3B	33.332
AX-108941309	3B	33.332
AX-109510863	3B	33.332
AX-110523426	3B	33.332
AX-110635819	3B	33.332
AX-111105740	3B	33.332
AX-108929600	3B	33.332
AX-111631309	3B	33.332
AX-108864209	3B	33.332
AX-109438114	3B	33.332
AX-110420957	3B	33.332
AX-111215340	3B	33.332
AX-111556293	3B	33.332
AX-95631741	3B	33.332
AX-109101186	3B	33.332
AX-109818817	3B	33.332
AX-111519078	3B	33.332
AX-111588627	3B	33.332
AX-94583481	3B	33.332
AX-109030923	3B	33.332
AX-111454197	3B	33.332
AX-111571753	3B	33.332
AX-108750093	3B	33.332
AX-108743631	3B	33.332
AX-109020530	3B	33.332
AX-109324688	3B	33.332
AX-109843261	3B	33.332
AX-109869219	3B	33.332
AX-109962706	3B	33.332
AX-110020353	3B	33.332
AX-110958999	3B	33.332
AX-111014699	3B	33.332
AX-111762194	3B	33.332
AX-108844957	3B	33.332
AX-109464958	3B	33.332
AX-109975667	3B	33.332
AX-111135493	3B	33.332
AX-109453660	3B	33.332
AX-110505041	3B	33.332
AX-109007810	3B	33.332
AX-108732207	3B	33.332
AX-109077127	3B	33.332
AX-110477927	3B	33.332
AX-108971580	3B	33.332
AX-109317301	3B	33.332
AX-109495743	3B	33.332
AX-109977594	3B	33.332
AX-111220563	3B	33.332
AX-110484780	3B	33.332
AX-108862244	3B	33.332
AX-110539550	3B	33.332
AX-108819166	3B	33.332
AX-110371963	3B	33.332
AX-108956523	3B	33.332
AX-110431388	3B	33.332
AX-110087708	3B	33.872
AX-110404264	3B	33.872
AX-109972119	3B	33.872
AX-111009966	3B	33.872
AX-108886660	3B	34.131
AX-110415329	3B	34.131
AX-111454989	3B	34.131
AX-110033986	3B	34.131
AX-108894373	3B	34.131
AX-109853421	3B	34.131
AX-111094996	3B	34.131
AX-108855253	3B	34.131
AX-111696159	3B	34.131
AX-109457300	3B	34.131
AX-110360533	3B	34.131
AX-110977370	3B	34.131
AX-109856620	3B	34.131
AX-109421603	3B	34.131
AX-109508433	3B	34.131
AX-110563816	3B	34.131
AX-110031774	3B	34.131
AX-111644195	3B	34.451
AX-94491794	3B	34.451
AX-111034415	3B	34.451
AX-111247647	3B	34.451
AX-111506270	3B	34.451
AX-109298606	3B	34.451
AX-110077289	3B	34.451
AX-108832022	3B	34.451
AX-109514030	3B	34.451
AX-110672900	3B	34.451
AX-109971225	3B	34.451
AX-110462696	3B	34.451
AX-109296569	3B	34.451
AX-110044836	3B	34.451
AX-110093197	3B	34.451
AX-110538480	3B	34.451
AX-111596195	3B	34.451
AX-111499878	3B	34.451
AX-109918095	3B	34.451
AX-110388372	3B	34.451
AX-111619263	3B	34.451
AX-111461430	3B	34.451
AX-110191783	3B	34.451
AX-111143366	3B	34.451
AX-108903825	3B	34.451
AX-111587233	3B	34.451
AX-111054390	3B	34.451
AX-111130557	3B	34.451
AX-108873132	3B	34.451
AX-108977356	3B	34.451
AX-109577406	3B	34.451
AX-111028454	3B	34.451
AX-111486087	3B	34.451
AX-109947817	3B	34.451
AX-109390038	3B	34.451
AX-111639729	3B	34.451
AX-110442144	3B	34.451
AX-109521195	3B	34.451
AX-110965165	3B	34.451
AX-111074425	3B	34.451
AX-108863701	3B	34.451
AX-109851741	3B	34.451
AX-111688452	3B	34.451
AX-109425905	3B	34.451
AX-111474821	3B	34.451
AX-111511712	3B	34.451
AX-108981370	3B	34.451
AX-110444798	3B	34.451
AX-109363475	3B	34.451
AX-110469765	3B	34.451
AX-110016375	3B	34.451
AX-109821999	3B	34.451
AX-110480738	3B	34.451
AX-111082743	3B	35.653
AX-94535613	3B	35.653
AX-110416221	3B	35.653
AX-109918384	3B	35.653
AX-111056908	3B	35.653
AX-109324517	3B	35.653
AX-111534919	3B	35.653
AX-111542527	3B	37.179
AX-109270692	3B	37.179
AX-109379158	3B	37.179
AX-110442006	3B	37.179
AX-110931538	3B	37.179
AX-109323886	3B	37.371
AX-95658839	3B	37.371
AX-110492055	3B	37.371
AX-111610655	3B	37.371
AX-108861703	3B	37.371
AX-179559287	3B	37.371
AX-86174642	3B	37.371
AX-108901344	3B	37.371
AX-110663864	3B	37.371
AX-110995930	3B	37.371
AX-109877422	3B	37.371
AX-108961067	3B	47.067
AX-110026645	3B	51.893
AX-179560154	3B	51.893
AX-110148105	3B	51.893
AX-109294391	3B	51.893
AX-109320348	3B	51.893
AX-111469280	3B	52.209
AX-86173783	3B	57.257
AX-86163840	3B	60.391
AX-179559612	3B	60.948
AX-109823449	3B	60.948
AX-111463964	3B	60.948
AX-94402393	3B	60.948
AX-111642784	3B	60.948
AX-111717958	3B	60.948
AX-109296487	3B	60.948
AX-109382739	3B	60.948
AX-110398159	3B	60.948
AX-95658201	3B	60.948
AX-95659033	3B	60.948
AX-95681479	3B	60.948
AX-109084787	3B	60.948
AX-110409143	3B	60.948
AX-110574411	3B	60.948
AX-111212031	3B	60.948
AX-110484179	3B	60.948
AX-109850260	3B	60.948
AX-110020051	3B	60.948
AX-110689958	3B	60.948
AX-179558168	3B	60.948
AX-179559924	3B	60.948
AX-109816748	3B	60.948
AX-110050186	3B	60.948
AX-110087992	3B	60.948
AX-111470531	3B	60.948
AX-108795061	3B	60.948
AX-108793614	3B	60.948
AX-179558359	3B	60.948
AX-111776545	3B	60.948
AX-110658724	3B	60.948
AX-111692905	3B	60.948
AX-110919835	3B	60.948
AX-111164218	3B	60.948
AX-86169317	3B	61.226
AX-94716868	3B	61.226
AX-111468013	3B	64.499
AX-109864459	3B	65.282
AX-111603619	3B	65.282
AX-89423802	3B	67.368
AX-110463744	3B	68.745
AX-95662262	3B	70.182
AX-179560265	3B	70.182
AX-108964753	3B	72.048
AX-111148152	3B	73.362
AX-179562392	3B	73.362
AX-108777304	3B	73.362
AX-109280261	3B	73.362
AX-109949000	3B	73.362
AX-111587204	3B	73.362
AX-179477145	3B	73.362
AX-108838119	3B	73.362
AX-109840892	3B	73.362
AX-95111761	3B	73.362
AX-95630072	3B	73.362
AX-111038044	3B	73.362
AX-110710251	3B	73.362
AX-109863066	3B	73.362
AX-111590281	3B	73.362
AX-109294746	3B	73.362
AX-111652193	3B	73.86
AX-109400091	3B	73.86
AX-109283973	3B	73.86
AX-110573595	3B	73.86
AX-94518159	3B	73.86
AX-95658645	3B	73.86
AX-110391554	3B	73.86
AX-111118242	3B	73.86
AX-110603286	3B	74.376
AX-108980315	3B	74.376
AX-110434937	3B	74.376
AX-89586751	3B	78.873
AX-109962666	3B	79.453
AX-95229843	3B	79.453
AX-111472967	3B	81.847
AX-94414229	3B	90.451
AX-112289934	3B	93.926
AX-111189071	3B	99.557
AX-109345401	3B	99.557
AX-94517134	3B	99.557
AX-95652069	3B	99.557
AX-109495086	3B	99.826
AX-110683834	3B	99.826
AX-109342305	3B	99.826
AX-110123112	3B	99.826
AX-108759829	3B	99.826
AX-108916664	3B	99.826
AX-109905703	3B	99.826
AX-110926008	3B	99.826
AX-109082796	3B	99.826
AX-109949824	3B	99.826
AX-111123326	3B	99.826
AX-109454137	3B	99.826
AX-111612266	3B	99.826
AX-111530972	3B	100.731
AX-109914188	3B	100.731
AX-111535437	3B	100.731
AX-109279719	3B	100.731
AX-110413934	3B	100.731
AX-111532831	3B	100.731
AX-109998884	3B	101.553
AX-110397603	3B	103.806
AX-86178821	3B	113.433
AX-112286047	3B	113.433
AX-86178820	3B	113.433
AX-108989876	4B	0
AX-110477337	4B	0
AX-94438527	4B	11.669
AX-110376140	4B	15.579
AX-110984065	4B	15.579
AX-111738217	4B	15.579
AX-89594457	4B	15.579
AX-109840265	4B	15.579
AX-89380014	4B	15.579
AX-95651710	4B	17.279
AX-179561896	4B	17.279
AX-94801023	4B	17.279
AX-94901118	4B	17.794
AX-94707905	4B	17.794
AX-110984298	4B	20.294
AX-108767762	4B	20.294
AX-110943385	4B	20.294
AX-108728404	4B	20.503
AX-110582190	4B	20.503
AX-108849953	4B	21.815
AX-108755131	4B	21.815
AX-95653582	4B	21.815
AX-110979231	4B	21.815
AX-108734564	4B	21.815
AX-110948898	4B	21.815
AX-110617576	4B	21.815
AX-94807699	4B	21.815
AX-95630624	4B	21.815
AX-110940047	4B	21.815
AX-109003211	4B	25.573
AX-95630138	4B	25.573
AX-95630575	4B	28.109
AX-94498096	4B	28.109
AX-108867943	4B	28.109
AX-111642793	4B	28.109
AX-111160337	4B	28.109
AX-109867332	4B	28.109
AX-111596184	4B	28.308
AX-108833948	4B	28.308
AX-108881314	4B	28.308
AX-110919561	4B	28.308
AX-108894315	4B	28.308
AX-108790779	4B	28.308
AX-112286377	4B	28.308
AX-109417462	4B	28.308
AX-110618049	4B	28.308
AX-94539425	4B	28.308
AX-110565938	4B	28.308
AX-109496305	4B	28.308
AX-94543294	4B	28.308
AX-111632313	4B	28.308
AX-109926416	4B	28.308
AX-109878255	4B	28.308
AX-109333141	4B	28.308
AX-110564469	4B	28.308
AX-111826497	4B	28.308
AX-108743578	4B	28.308
AX-108852213	4B	28.308
AX-109389480	4B	28.308
AX-109954310	4B	28.308
AX-110398714	4B	28.308
AX-108822594	4B	28.308
AX-108849338	4B	28.308
AX-110926494	4B	28.308
AX-94399941	4B	28.308
AX-108830847	4B	28.308
AX-108916045	4B	28.308
AX-109447339	4B	28.308
AX-111566580	4B	28.308
AX-111619190	4B	28.308
AX-108987253	4B	28.308
AX-110566168	4B	28.308
AX-111510896	4B	28.308
AX-109479017	4B	28.308
AX-108877659	4B	28.308
AX-108955158	4B	28.308
AX-110504751	4B	28.308
AX-110101155	4B	28.308
AX-108801153	4B	28.308
AX-110035658	4B	28.308
AX-110538202	4B	28.308
AX-109305419	4B	28.308
AX-109958300	4B	28.308
AX-110942280	4B	28.308
AX-111030884	4B	28.308
AX-110042017	4B	28.308
AX-108843186	4B	28.308
AX-110049312	4B	28.308
AX-110125630	4B	28.308
AX-111063143	4B	28.308
AX-108927259	4B	28.308
AX-108934061	4B	28.308
AX-109370154	4B	28.308
AX-94480135	4B	28.308
AX-94613145	4B	28.308
AX-108780629	4B	28.308
AX-108908866	4B	28.308
AX-109341791	4B	28.308
AX-110410884	4B	28.308
AX-111234988	4B	28.308
AX-110020454	4B	28.308
AX-109442835	4B	28.308
AX-110444152	4B	28.308
AX-111780488	4B	28.308
AX-110001527	4B	28.308
AX-109534445	4B	28.308
AX-95191849	4B	31.634
AX-86172324	4B	31.634
AX-179560998	4B	31.634
AX-95232992	4B	31.634
AX-112289447	4B	31.634
AX-94405950	4B	31.634
AX-94978889	4B	31.634
AX-109406195	4B	32.971
AX-94686559	4B	32.971
AX-86185042	4B	32.971
AX-110976614	4B	32.971
AX-179560851	4B	33.406
AX-110067280	4B	40.35
AX-110990114	4B	40.35
AX-110166746	4B	40.35
AX-111654978	4B	40.35
AX-109511569	4B	40.35
AX-111520204	4B	40.35
AX-110956404	4B	40.35
AX-110530344	4B	40.35
AX-109326079	4B	40.35
AX-110036224	4B	40.35
AX-89458124	4B	40.35
AX-110406313	4B	40.35
AX-110458031	4B	40.35
AX-111144316	4B	40.35
AX-111517520	4B	40.35
AX-111692158	4B	40.83
AX-108855450	4B	40.83
AX-109324496	4B	40.83
AX-111029132	4B	40.83
AX-109321119	4B	40.83
AX-111640358	4B	40.83
AX-111552897	4B	40.83
AX-111038094	4B	40.83
AX-109411108	4B	40.83
AX-94924003	4B	40.83
AX-95630696	4B	40.83
AX-108954800	4B	40.83
AX-109935952	4B	40.83
AX-111053730	4B	40.83
AX-111630158	4B	40.83
AX-110455383	4B	40.83
AX-111094613	4B	40.83
AX-86171671	4B	40.83
AX-94513518	4B	40.83
AX-108868561	4B	40.83
[truncated: 2,142 more rows]

## Sheet: Table S4
Table S4 QTLs detected in the BIP module for TGW and GRTs in the BC-RILs.
Traits	QTL	Environments	Chromosome	Interval	LeftMarker	RightMarker	LOD	PVE	Add
TGW	QTgw.cib-2A.1	3E	2A	62.5-63.5	AX-108936006	AX-86178504	4.3766	9.4267	1.6602
		5E	2A	62.5-63.5	AX-108936006	AX-86178504	4.2597	6.8986	1.6615
	QTgw.cib-2A.2	1E	2A	69.5-70.5	AX-110458328	AX-109977510	2.9772	9.3724	2.2279
		4E	2A	69.5-70.5	AX-110458328	AX-109977510	3.9236	12.7366	2.5412
		BLUE	2A	69.5-70.5	AX-110458328	AX-109977510	3.3871	10.9662	1.8418
	QTgw.cib-2A.3	1E	2A	93.5-95.5	AX-109879502	AX-110061442	3.5361	5.9618	1.7758
		4E	2A	93.5-95.5	AX-109879502	AX-110061442	3.3864	6.2771	1.7783
		5E	2A	93.5-95.5	AX-110061442	AX-111546320	3.5925	8.3276	1.7865
		BLUE	2A	93.5-94.5	AX-109879502	AX-110061442	4.4102	7.4637	1.5132
	QTgw.cib-2A.4	5E	2A	0-2.5	AX-89605342	AX-86180346	2.5109	3.6774	-1.1846
	QTgw.cib-2D	2E	2D	19.5-21.5	AX-108762451	AX-110340304	2.5283	5.4551	1.6688
	QTgw.cib-4D	2E	4D	2.5-10.5	AX-110977051	AX-110320914	4.948	11.833	2.4564
	QTgw.cib-5A1	5E	5A1	2.5-11.5	AX-95684258	AX-94406550	2.8943	4.8334	1.3574
	QTgw.cib-6A	1E	6A	31.5-33.5	AX-179558821	AX-111806104	3.2182	8.7286	1.8627
		2E	6A	31.5-33.5	AX-179558821	AX-111806104	4.588	12.3589	2.5842
		3E	6A	31.5-33.5	AX-179558821	AX-111806104	3.7883	9.8895	1.6738
		4E	6A	31.5-33.5	AX-179558821	AX-111806104	3.9691	11.0821	2.383
		5E	6A	32.5-35.5	AX-179558821	AX-111806104	5.8038	14.8429	2.3416
		6E	6A	32.5-36.5	AX-111806104	AX-109838705	2.5697	6.8244	1.5689
		BLUE	6A	31.5-33.5	AX-179558821	AX-111806104	5.6628	14.3857	2.087
	QTgw.cib-6B	3E	6B	42.5-57.5	AX-95632065	AX-94740723	2.5332	5.2134	1.2292
	QTgw.cib-6D1	4E	6D1	0-2.5	AX-109468717	AX-89643022	4.5787	8.5347	2.1279
		6E	6D1	0-2.5	AX-109468717	AX-89643022	3.3736	7.9283	1.6609
		BLUE	6D1	0-2.5	AX-109468717	AX-89643022	4.806	8.0778	1.6155
	QTgw.cib-7A	4E	7A	31.5-32.5	AX-111558895	AX-112290195	2.7919	5.3469	1.6534
	QTgw.cib-7D	6E	7D	60.5-64.5	AX-110426671	AX-110555929	3.09	7.5838	1.5769
GL	QGl.cib-2A.1	3E	2A	2.5-4.5	AX-86180346	AX-95682187	3.9534	6.9939	-0.0747
		5E	2A	0-1.5	AX-89605342	AX-86180346	11.0965	14.7637	-0.127
		6E	2A	0-1.5	AX-89605342	AX-86180346	7.1154	12.2989	-0.112
		BLUE	2A	0-2.5	AX-89605342	AX-86180346	4.9318	7.0605	-0.0822
	QGl.cib-2A.2	6E	2A	54.5-57.5	AX-109844516	AX-95632103	2.5528	4.2994	0.0679
		5E	2A	57.5-59.5	AX-89729161	AX-109873869	3.0787	3.7014	0.0649
	QGl.cib-2A.3	5E	2A	69.5-70.5	AX-110458328	AX-109977510	4.5859	9.8133	0.1043
		BLUE	2A	69.5-70.5	AX-110458328	AX-109977510	3.8046	9.4673	0.0957
	QGl.cib-3D	3E	3D	3.5-6.5	AX-110941541	AX-111489545	3.1791	5.7271	-0.0673
	QGl.cib-4A	3E	4A	20.5-29.5	AX-95631668	AX-112288579	4.2386	7.7694	0.0785
		4E	4A	19.5-29.5	AX-95631668	AX-112288579	2.5217	6.5333	0.1345
		5E	4A	28.5-29.5	AX-112288579	AX-112288645	5.2327	6.4268	0.0839
		6E	4A	28.5-29.5	AX-112288579	AX-112288645	2.9155	4.7638	0.0698
		BLUE	4A	19.5-29.5	AX-95631668	AX-112288579	4.3422	6.9965	0.0818
	QGl.cib-5A1	5E	5A1	0-2.5	AX-111158819	AX-108839873	4.0323	4.8979	0.0735
		6E	5A1	0-7.5	AX-108839873	AX-95684258	3.2272	5.9173	0.0779
		BLUE	5A1	2.5-6.5	AX-108839873	AX-95684258	4.2102	6.7487	0.0804
	QGl.cib-6A.1	2E	6A	31.5-33.5	AX-179558821	AX-111806104	2.9338	7.8372	0.1439
		3E	6A	31.5-33.5	AX-179558821	AX-111806104	3.674	9.6509	0.0861
		5E	6A	31.5-33.5	AX-179558821	AX-111806104	4.1274	10.7347	0.1031
		BLUE	6A	31.5-33.5	AX-179558821	AX-111806104	4.9897	12.8029	0.1075
	QGl.cib-6A.2	6E	6A	37.5-44.5	AX-109844821	AX-110609622	3.7637	9.7061	0.1055
	QGl.cib-6B	1E	6B	87.5-98	AX-110409758	AX-111521825	2.9142	8.2668	-0.1699
	QGl.cib-6D1.1	6E	6D1	16.5-18.5	AX-111368177	AX-111496575	2.5044	4.0934	0.0645
		BLUE	6D1	16.5-18.5	AX-111261865	AX-111368177	3.2029	4.4898	0.0655
	QGl.cib-6D1.2	1E	6D1	27.5-29.5	AX-110564593	AX-110040257	2.6133	7.3363	0.1601
		2E	6D1	27.5-29.5	AX-110564593	AX-110040257	3.8648	10.2601	0.1544
	QGl.cib-7A	5E	7A	19.5-20.5	AX-109503299	AX-95630649	3.0619	3.6559	-0.064
GW	QGw.cib-2A.1	3E	2A	62.5-63.5	AX-108936006	AX-86178504	3.4804	9.0657	0.0458
		5E	2A	62.5-64.5	AX-86178504	AX-179559057	3.0518	9.0761	0.0471
		6E	2A	61.5-62.5	AX-111658893	AX-111008831	2.5147	8.7778	0.0416
	QGw.cib-2A.2	4E	2A	6.5-12.5	AX-110917900	AX-110498447	3.539	9.2347	0.0808
	QGw.cib-2A.3	2E	2A	19.5-22.5	AX-94818897	AX-109925910	2.5094	6.3598	0.0651
	QGw.cib-4D	2E	4D	0-1.5	AX-89398511	AX-110977051	4.9832	13.0611	0.0957
	QGw.cib-6A	2E	6A	23.5-31.5	AX-110009072	AX-94601335	2.5338	6.4074	0.0798
		5E	6A	32.5-35.5	AX-179558821	AX-111806104	3.6049	9.6088	0.0447
		BLUE	6A	31.5-33.5	AX-179558821	AX-111806104	2.7277	7.2558	0.0386
	QGw.cib-6D1	6E	6D1	0-2.5	AX-109468717	AX-89643022	2.877	7.1289	0.0385
		BLUE	6D1	0-2.5	AX-109468717	AX-89643022	4.0704	10.1798	0.043
	QGw.cib-7D.1	5E	7D	16.5-30.5	AX-109353584	AX-110864195	2.6644	4.9434	-0.035
	QGw.cib-7D.2	5E	7D	65.5-70.5	AX-110659621	AX-110826147	4.3592	7.5844	0.0429
GA	QGa.cib-1D	3E	1D	35.5-39.5	AX-109366725	AX-110517056	2.5761	6.5739	-0.7442
	QGa.cib-2A.1	5E	2A	93.5-95.5	AX-110061442	AX-111546320	3.7955	7.8893	0.3785
		BLUE	2A	93.5-94.5	AX-109879502	AX-110061442	4.9804	8.1227	0.3523
	QGa.cib-2A.2	5E	2A	0-1.5	AX-89605342	AX-86180346	5.069	6.8013	-0.3506
	QGa.cib-2A.3	6E	2A	61.5-64.5	AX-111658893	AX-111008831	2.5307	7.3659	0.3709
	QGa.cib-2A.4	5E	2A	69.5-70.5	AX-110458328	AX-109977510	3.539	7.7743	0.3766
	QGa.cib-5A1.1	5E	5A1	7.5-12.5	AX-95684258	AX-94406550	4.6785	7.3432	0.3642
	QGa.cib-5A1.2	BLUE	5A1	17.5-24.5	AX-109411291	AX-94566370	2.8291	4.4344	0.2606
	QGa.cib-6A	2E	6A	31.5-33.5	AX-179558821	AX-111806104	2.9644	8.1428	0.7206
		3E	6A	31.5-33.5	AX-179558821	AX-111806104	3.2394	9.1908	0.8745
		5E	6A	31.5-33.5	AX-179558821	AX-111806104	5.6745	14.3355	0.4907
		6E	6A	32.5-36.5	AX-111806104	AX-109838705	3.4939	9.197	0.3993
		BLUE	6A	31.5-33.5	AX-179558821	AX-111806104	5.5175	14.0855	0.4601
	QGa.cib-5B	4E	5B	19.5-28.5	AX-95659038	AX-108935277	2.7884	6.341	-0.8298
	QGa.cib-6D1	6E	6D1	16.5-18.5	AX-111368177	AX-111496575	3.1476	6.6058	0.349
		BLUE	6D1	16.5-18.5	AX-111368177	AX-111496575	4.4168	7.108	0.3279
	QGa.cib-6D1.1	2E	6D1	27.5-29.5	AX-110564593	AX-110040257	11.2224	13.0287	1.3206
	QGa.cib-6D1.2	2E	6D1	35.5-37.5	AX-110425031	AX-111589242	5.8129	6.4857	-0.9316
GD	QGd.cib-1D.1	3E	1D	35.5-39.5	AX-109366725	AX-110517056	2.5127	6.4607	-0.0931
	QGd.cib-1D.2	5E	1D	49.5-54.5	AX-86174314	AX-179557993	2.529	3.5207	-0.0359
	QGd.cib-2A.1	5E	2A	69.5-70.5	AX-110458328	AX-109977510	3.6746	8.5653	0.0561
		BLUE	2A	69.5-70.5	AX-110458328	AX-109977510	2.6752	8.59	0.0536
	QGd.cib-2A.2	5E	2A	93.5-95.5	AX-110061442	AX-111546320	4.1472	8.9122	0.057
		BLUE	2A	93.5-94.5	AX-109879502	AX-110061442	5.0379	8.3288	0.0526
	QGd.cib-2A.3	5E	2A	0-1.5	AX-89605342	AX-86180346	4.8761	6.7997	-0.0497
	QGd.cib-5A1.1	5E	5A1	7.5-11.5	AX-95684258	AX-94406550	4.9104	8.0819	0.0542
	QGd.cib-5A1.2	BLUE	5A1	17.5-24.5	AX-109411291	AX-94566370	2.9537	4.7013	0.0396
	QGd.cib-5B	4E	5B	19.5-33.5	AX-95659038	AX-108935277	2.6177	6.0775	-0.1047
	QGd.cib-6A	2E	6A	31.5-33.5	AX-179558821	AX-111806104	3.1431	8.6226	0.1036
		3E	6A	31.5-33.5	AX-179558821	AX-111806104	3.2295	9.211	0.1107
		5E	6A	31.5-33.5	AX-179558821	AX-111806104	5.6032	14.1656	0.071
		6E	6A	32.5-36.5	AX-111806104	AX-109838705	3.4408	9.0537	0.0583
		BLUE	6A	31.5-33.5	AX-179558821	AX-111806104	5.5494	14.2056	0.0685
	QGd.cib-6B	1E	6B	85.5-98	AX-110409758	AX-111521825	2.8579	7.5063	-0.1247
	QGd.cib-6D1.1	6E	6D1	16.5-18.5	AX-111368177	AX-111496575	3.0289	6.9367	0.0504
		BLUE	6D1	16.5-18.5	AX-111368177	AX-111496575	4.2727	6.9533	0.0478
	QGd.cib-6D1.2	2E	6D1	27.5-29.5	AX-110564593	AX-110040257	11.3095	12.8707	0.185
	QGd.cib-6D1.3	2E	6D1	35.5-37.5	AX-110425031	AX-111589242	6.0689	6.6479	-0.133
GP	QGp.cib-1D	3E	1D	35.5-39.5	AX-109366725	AX-110517056	2.6699	6.7457	-0.3637
	QGp.cib-2A.1	6E	2A	0-1.5	AX-89605342	AX-86180346	3.9619	6.6613	-0.1984
		5E	2A	0-1.5	AX-89605342	AX-86180346	8.1926	9.4189	-0.2421
	QGp.cib-2A.2	5E	2A	69.5-70.5	AX-110458328	AX-109977510	5.2569	10.1017	0.2521
		BLUE	2A	69.5-70.5	AX-110458328	AX-109977510	2.8723	9.0214	0.2136
	QGp.cib-2A.3	5E	2A	93.5-95.5	AX-109879502	AX-110061442	2.8433	3.0995	0.1395
		BLUE	2A	93.5-94.5	AX-109879502	AX-110061442	4.6626	7.6158	0.1959
	QGp.cib-2A.4	6E	2A	54.5-57.5	AX-95632103	AX-89729161	3.2138	5.4253	0.1833
	QGp.cib-4A	5E	4A	29.5-32.5	AX-94400142	AX-94407690	3.8093	4.131	0.1602
	QGp.cib-5A1	5E	5A1	2.5-6.5	AX-108839873	AX-95684258	5.9504	7.26	0.2128
		BLUE	5A1	7.5-12.5	AX-95684258	AX-94406550	4.014	7.5944	0.1946
	QGp.cib-5B	4E	5B	19.5-28.5	AX-95659038	AX-108935277	3.2704	7.6249	-0.4123
	QGp.cib-6A	2E	6A	31.5-33.5	AX-179558821	AX-111806104	3.61	9.6248	0.3919
		3E	6A	31.5-33.5	AX-179558821	AX-111806104	3.0833	8.8298	0.4092
		5E	6A	31.5-33.5	AX-179558821	AX-111806104	5.3289	13.5182	0.2681
		BLUE	6A	31.5-33.5	AX-179558821	AX-111806104	6.112	15.5142	0.2778
		6E	6A	32.5-36.5	AX-111806104	AX-109838705	4.0632	10.5442	0.2444
	QGp.cib-6B	1E	6B	87.5-98	AX-110409758	AX-111521825	2.8549	8.0561	-0.4282
	QGp.cib-6D1.1	6E	6D1	16.5-18.5	AX-111368177	AX-111496575	4.1673	7.057	0.2042
		BLUE	6D1	7.5-17.5	AX-89643022	AX-111261865	3.0206	4.9608	0.1573
	QGp.cib-6D1.2	1E	6D1	27.5-29.5	AX-110564593	AX-110040257	2.525	7.0443	0.4005
		2E	6D1	27.5-29.5	AX-110564593	AX-110040257	11.8498	12.2083	0.6727
	QGp.cib-6D1.2	2E	6D1	35.5-37.5	AX-110425031	AX-111589242	5.8129	6.4857	-0.9316
	QGp.cib-7D.1	5E	7D	16.5-28.5	AX-109353584	AX-110864195	2.9664	3.7897	-0.1557
	QGp.cib-7D.2	6E	7D	59.5-63.5	AX-110426671	AX-110555929	2.9044	5.1046	0.1739
GR	QGr.cib-2A	1E	2A	5.5-14.5	AX-110917900	AX-110498447	2.9485	8.11	0.0075
		2E	2A	5.5-12.5	AX-110917900	AX-110498447	6.3924	11.5435	0.0109
		4E	2A	6.5-11.5	AX-110917900	AX-110498447	9.2691	17.1161	0.0148
		6E	2A	8.5-15.5	AX-110917900	AX-110498447	6.059	14.2448	0.0104
		BLUE	2A	8.5-12.5	AX-110917900	AX-110498447	8.9067	16.5155	0.0104
	QGr.cib-2D.1	4E	2D	17.5-18.5	AX-111134429	AX-95008796	4.0314	9.6851	0.0113
	QGr.cib-2D.2	2E	2D	19.5-21.5	AX-108762451	AX-110340304	3.9848	6.3078	0.0081
	QGr.cib-4A	3E	4A	20.5-29.5	AX-95631668	AX-112288579	2.819	7.5207	-0.0058
		6E	4A	29.5-30.5	AX-94400142	AX-94407690	2.9263	5.1352	-0.0063
		BLUE	4A	17.5-29.5	AX-95631668	AX-112288579	3.1497	5.5637	-0.006
	QGr.cib-5A1	2E	5A1	0-2.5	AX-111158819	AX-108839873	6.3397	10.3526	-0.0104
		4E	5A1	0-2.5	AX-111158819	AX-108839873	3.2642	5.0487	-0.0081
		6E	5A1	0-2.5	AX-111158819	AX-108839873	2.584	4.4786	-0.0059
		BLUE	5A1	0-2.5	AX-111158819	AX-108839873	4.5742	6.6891	-0.0066
	QGr.cib-5B.1	BLUE	5B	45.5-46.5	AX-95094658	AX-110673101	3.5092	5.0738	0.0059
	QGr.cib-5B.2	1E	5B	58.5-59.5	AX-110070373	AX-110433907	2.6043	6.6759	0.0068
	QGr.cib-6B.1	4E	6B	60.5-62.5	AX-95659648	AX-94420407	3.8721	6.0989	-0.0089
	QGr.cib-6B.2	1E	6B	86.5-98	AX-110409758	AX-111521825	2.9409	7.7218	-0.9678
LWR	QLwr.cib-2A	1E	2A	5.5-14.5	AX-110917900	AX-110498447	3.097	7.2698	-0.0321
		2E	2A	5.5-12.5	AX-110917900	AX-110498447	6.3524	11.3584	-0.0545
		4E	2A	6.5-12.5	AX-110917900	AX-110498447	8.8928	16.73	-0.0619
		6E	2A	8.5-15.5	AX-110917900	AX-110498447	5.2034	11.66	-0.0407
		BLUE	2A	8.5-12.5	AX-110917900	AX-110498447	9.7197	18.0405	-0.0482
	QLwr.cib-2B	4E	2B	45.5-64.5	AX-86179354	AX-86164309	2.5036	6.1549	-0.0375
	QLwr.cib-2D.1	4E	2D	17.5-18.5	AX-111134429	AX-95008796	3.5035	8.2699	-0.0439
	QLwr.cib-2D.2	2E	2D	19.5-21.5	AX-108762451	AX-110340304	3.6499	5.7268	-0.039
	QLwr.cib-4A	3E	4A	29.5-30.5	AX-94400142	AX-94407690	2.9133	8.6009	0.0258
		5E	4A	28.5-29.5	AX-112288579	AX-112288645	3.1774	6.9627	0.0319
		6E	4A	29.5-30.5	AX-94400142	AX-94407690	2.8254	4.7106	0.0259
		BLUE	4A	29.5-30.5	AX-94400142	AX-94407690	3.0255	4.2873	0.0235
	QLwr.cib-5A1	2E	5A1	0-2.5	AX-111158819	AX-108839873	5.8214	9.3988	0.0497
		4E	5A1	0-2.5	AX-111158819	AX-108839873	3.1766	4.9803	0.0338
		BLUE	5A1	0-2.5	AX-111158819	AX-108839873	4.5687	6.5622	0.0292
	QLwr.cib-5B.1	BLUE	5B	40.5-41.5	AX-94389734	AX-110591001	2.8845	4.143	-0.0232
	QLwr.cib-5B.2	1E	5B	46.5-47.5	AX-94464288	AX-110509091	3.2435	7.0364	-0.0323
	QLwr.cib-6B	4E	6B	60.5-62.5	AX-95659648	AX-94420407	3.3956	5.3942	0.0353
	QLwr.cib-7D	5E	7D	65.5-70.5	AX-110659621	AX-110826147	2.9072	6.6575	-0.0311
LOD, logarithm of odds; PVE, phenotypic variation explained; Add, additive effect (positive values indicate that alleles from ZKM138 increase the traits scores, and negative values indicate that alleles from CM44 increase the trait scores). Major QTLs are in BOLD typeface, and QTLs with a LOD > 3.5 and PVE > 10% (on average) are considered major QTLs.

## Sheet: Table S5
Table S5 QTLs detected in the MET module for TGW and GRTs in the BC population.
Traits	Chromosome	Position	LeftMarker	RightMarker	LOD	LOD(A)	LOD(AbyE)	PVE	PVE(A)	PVE(AbyE)	Add	AbyE_01	AbyE_02	AbyE_03	AbyE_04	AbyE_05	AbyE_06	AbyE_07	LeftCI	RightCI	Detected QTLs
TGW	2A	0	AX-89605342	AX-86180346	4.3278	1.0986	3.2291	0.974	0.2767	0.6973	-0.3357	-0.3964	0.4962	-0.0501	0.8839	-0.8489	-0.2385	0.1537	0	1.5	QTgw.cib-2A.4
	2A	9	AX-110917900	AX-110498447	2.626	0.787	1.839	0.7227	0.1849	0.5378	0.2746	-0.4415	0.5182	-0.3898	0.8527	-0.2115	-0.3814	0.0534	4.5	14.5
	2A	25	AX-109925910	AX-94998685	2.9785	1.8552	1.1233	0.7962	0.4381	0.3581	0.4228	-0.116	0.2297	-0.4554	0.7586	-0.416	-0.0175	0.0166	23.5	29.5
	2A	63	AX-108936006	AX-86178504	9.1571	4.0621	5.095	1.8789	1.0079	0.871	0.6556	-0.4249	-0.0594	0.9628	-0.4104	0.9148	-0.4777	-0.5052	62.5	63.5	QTgw.cib-2A.1
	2A	70	AX-110458328	AX-109977510	12.5303	11.691	0.8392	3.0449	2.6781	0.3667	1.0509	0.2903	0.1197	-0.5607	0.5815	-0.5471	0.0331	0.0832	69.5	70.5	QTgw.cib-2A.2
	2A	94	AX-109879502	AX-110061442	17.7566	15.9718	1.7848	4.4538	4.1105	0.3433	1.3004	0.4648	-0.139	-0.4316	0.466	-0.003	-0.5567	0.1994	93.5	94.5	QTgw.cib-2A.3
	3A	3	AX-108794206	AX-109407758	2.8616	0.9722	1.8894	0.7022	0.2444	0.4578	0.3197	0.2807	-0.1362	-0.0634	0.6889	-0.8186	-0.1907	0.2394	0	6.5
	3A	19	AX-109366295	AX-111541125	2.7072	1.4155	1.2916	0.766	0.3499	0.4162	0.384	0.0534	0.375	-0.5367	0.73	-0.4607	-0.2191	0.0581	16.5	26.5
	4A	0	AX-94409394	AX-111578911	5.2671	4.0354	1.2317	1.1761	1.0116	0.1645	0.648	0.1912	-0.1046	-0.2009	-0.4974	0.2151	0.2924	0.1043	0	0.5
	4A	15	AX-95631668	AX-112288579	3.7791	2.6202	1.1588	0.8358	0.6276	0.2082	0.5112	0.2726	0.0912	-0.2603	-0.5662	0.0236	0.3593	0.0799	8.5	27.5
	4A	33	AX-108836622	AX-109303147	3.7047	3.0734	0.6313	0.9382	0.7717	0.1665	0.5622	0.252	0.0984	-0.2366	-0.104	-0.4443	0.3679	0.0667	31.5	33.5
	4A	38	AX-110471504	AX-111654872	2.6737	2.325	0.3488	0.6448	0.5791	0.0657	0.4909	0.196	-0.1579	-0.0872	0.1334	-0.2832	0.1354	0.0636	36.5	40.5
	5A1	7	AX-108839873	AX-95684258	7.7849	5.0931	2.6918	1.7117	1.2773	0.4344	0.7209	0.3455	-0.6028	-0.6231	-0.0263	0.5484	0.163	0.1952	5.5	9.5	QTgw.cib-5A1
	5A1	18	AX-109411291	AX-94566370	5.8578	3.7469	2.1108	1.4314	0.9335	0.4979	0.6206	0.6261	-0.0648	-0.7194	0.1348	-0.5718	0.2656	0.3294	17.5	20.5
	5A1	65	AX-109620371	AX-110418098	3.0181	2.0381	0.98	0.6424	0.5072	0.1353	0.4568	0.0443	-0.4919	0.115	0.1771	-0.178	0.0835	0.2499	62.5	65.5
	5A2	0	AX-109941570	AX-109983844	3.0886	1.8857	1.2029	0.7485	0.4738	0.2747	-0.4393	0.0463	-0.1246	0.7736	-0.2685	-0.2437	-0.1885	0.0054	0	4.5
	5A2	20	AX-108841395	AX-108811182	3.4647	2.9987	0.4661	0.8897	0.7526	0.137	-0.5547	-0.0246	-0.3699	0.4468	0.0738	-0.1777	-0.0658	0.1174	17.5	21.5
	6A	4	AX-94506461	AX-86168860	2.5249	1.8608	0.6641	0.6638	0.4688	0.195	-0.448	-0.3405	-0.4217	-0.1097	0.2896	0.3128	0.3088	-0.0392	0	5.5
	6A	33	AX-179558821	AX-111806104	33.5165	26.5938	6.9227	8.268	7.043	1.225	1.751	0.1241	0.6857	-0.037	-1.4368	0.9052	-0.5286	0.2874	32.5	33.5	QTgw.cib-6A
	6A	37	AX-108826255	AX-111232648	6.2037	1.4489	4.7549	1.8904	0.3632	1.5272	0.3967	-0.5511	-0.2713	-0.634	1.735	-0.5348	0.6397	-0.3835	36.5	37.5
	7A	4	AX-111520161	AX-111537329	2.6448	1.0203	1.6245	0.5765	0.2565	0.32	0.3253	-0.216	-0.5904	0.2513	0.2661	-0.3985	0.3386	0.349	0	6.5
	7A	32	AX-111558895	AX-112290195	6.8911	5.3016	1.5895	1.7483	1.326	0.4223	0.7442	-0.5155	-0.0822	-0.362	0.8526	-0.2231	0.162	0.1682	31.5	32.5	QTgw.cib-7A
	7A	63	AX-94523052	AX-110541561	3.3723	2.7179	0.6544	0.8374	0.6811	0.1564	0.5264	0.2348	-0.0773	-0.5344	0.1564	-0.095	0.2454	0.0702	62.5	63.5
	7A	69	AX-110696985	AX-110523034	4.0353	3.375	0.6603	0.9893	0.8365	0.1528	0.5883	0.1094	-0.0013	-0.4489	0.2808	-0.2951	0.1858	0.1693	66.5	71.5
	7A	97	AX-111675883	AX-110996516	5.7617	4.7935	0.9683	1.2139	1.0863	0.1276	0.6672	0.2477	-0.3258	-0.0199	0.1568	-0.3314	0.2517	0.0208	96.5	97.5
	2B	81	AX-111175275	AX-179557321	2.5406	2.126	0.4147	0.6133	0.5288	0.0845	-0.464	-0.0294	-0.2947	0.044	0.3667	-0.1057	-0.0416	0.0607	78.5	86.5
	3B	0	AX-110984638	AX-111080504	4.804	3.9944	0.8096	1.1659	1.0014	0.1645	0.6567	0.3227	-0.0096	0.0633	-0.0553	-0.5853	0.1925	0.0718	0	2.5
	3B	100	AX-110123112	AX-111530972	5.4307	4.8845	0.5461	1.4515	1.2209	0.2306	-0.7187	-0.1098	-0.4328	0.5029	-0.2659	0.3893	0.0079	-0.0916	98.5	100.5
	3B	104	AX-110397603	AX-86178821	5.1384	4.5171	0.6213	1.4023	1.1225	0.2798	-0.678	-0.2426	-0.5171	0.6241	-0.0908	0.2763	-0.0421	-0.0078	102.5	106.5
	4B	16	AX-110376140	AX-95651710	5.6047	5.0031	0.6017	1.4601	1.2375	0.2226	-0.7096	-0.5739	-0.2845	0.0898	0.0655	0.3722	0.2602	0.0708	14.5	16.5
	4B	32	AX-95191849	AX-94686559	4.6912	4.1757	0.5155	1.2454	1.0419	0.2035	-0.6552	-0.2618	-0.4708	0.3119	0.302	0.2869	-0.1602	-0.008	30.5	32.5
	4B	36	AX-179560851	AX-110990114	4.866	4.0563	0.8097	1.236	0.9667	0.2693	-0.6295	-0.2671	-0.4967	0.2187	0.4029	0.406	-0.2819	0.018	33.5	40.5
	4B	47	AX-111645847	AX-111648532	2.762	1.8677	0.8943	0.717	0.4594	0.2576	-0.4324	-0.1269	-0.2969	0.1794	0.0801	0.6044	-0.4742	0.034	46.5	48.5
	5B	0	AX-108816181	AX-109859693	4.0345	3.8054	0.2291	0.9995	0.9561	0.0434	-0.6272	-0.2893	-0.0222	-0.0207	0.0691	0.1078	0.0008	0.1547	0	0.5
	5B	80	AX-95113198	AX-108766352	4.1245	2.91	1.2145	0.9821	0.7171	0.265	0.5412	0.2455	0.0996	-0.265	-0.1748	-0.5772	0.4538	0.2181	79.5	81.5
	6B	43	AX-95632065	AX-94740723	4.7847	2.1061	2.6786	1.0051	0.5313	0.4737	0.4742	-0.3015	-0.1384	0.7464	-0.7313	-0.1256	0.4059	0.1446	42.5	44.5	QTgw.cib-6B
	6B	60	AX-86173566	AX-95659326	2.8572	1.4811	1.3761	0.7823	0.3722	0.4101	-0.3892	-0.5678	0.0851	0.2338	-0.5504	0.0124	0.6858	0.1012	58.5	61.5
	6B	65	AX-86175756	AX-111212795	3.0154	2.2214	0.7939	0.7746	0.5579	0.2166	-0.4788	-0.5179	-0.0028	0.1624	-0.2554	-0.0206	0.4931	0.1411	62.5	67.5
	7B	73	AX-94665222	AX-109850181	2.8242	2.5126	0.3116	0.7699	0.6319	0.138	-0.5071	-0.4324	-0.1526	0.245	-0.0369	0.3411	-0.0292	0.0651	71.5	74.5
	7B	105	AX-109918671	AX-95659283	3.0917	2.6263	0.4653	0.7096	0.6552	0.0545	0.5163	0.0367	-0.2366	-0.118	0.1573	-0.129	0.1627	0.1269	104.5	106.5
	7B	115	AX-95659096	AX-86173722	2.6301	1.7065	0.9236	0.6458	0.4158	0.23	0.4143	-0.0737	0.1222	-0.3097	0.1043	-0.4813	0.545	0.0933	114.5	116.5
	1D	19	AX-109440131	AX-111543595	4.5497	4.0342	0.5155	1.1432	0.9605	0.1827	-0.6289	-0.1533	-0.2374	0.2927	-0.263	0.5176	-0.1547	-0.0018	12.5	25.5
	1D	52	AX-86174314	AX-179557993	9.2048	8.6616	0.5432	2.2324	2.1538	0.0786	-0.9401	0.0477	-0.3198	0.1682	0.0019	-0.2093	0.1746	0.1367	50.5	52.5
	1D	62	AX-179557993	AX-109983565	2.7822	0.0148	2.7675	0.6626	0.0037	0.6589	-0.0388	0.1313	0.4581	-0.0168	-0.8359	0.8608	-0.4292	-0.1683	61.5	67.5
	2D	21	AX-108762451	AX-110340304	5.5033	4.4592	1.0441	1.655	1.127	0.528	0.683	0.1884	0.9832	-0.5404	-0.0944	-0.4526	-0.1375	0.0533	20.5	21.5	QTgw.cib-2D
	2D	59	AX-111039289	AX-110438490	2.7318	1.0061	1.7257	0.6551	0.2526	0.4024	0.3254	-0.1104	-0.6017	0.3352	0.6766	-0.4673	0.0413	0.1263	55.5	60.5
	4D	3	AX-110977051	AX-110320914	8.4886	5.0657	3.423	2.7313	1.2779	1.4535	0.7272	0.6374	1.4609	-0.9674	-0.3842	-0.743	0.128	-0.1316	2.5	7.5	QTgw.cib-4D
	5D	18	AX-89700472	AX-109562679	5.8131	4.5919	1.2212	1.3239	1.0729	0.251	0.665	0.4296	-0.0888	-0.4752	-0.1954	-0.2094	0.4678	0.0713	15.5	20.5
	6D1	0	AX-109468717	AX-89643022	17.4895	15.368	2.1215	4.5825	3.936	0.6465	1.3059	0.0249	-0.0884	-0.8576	0.8219	-0.5653	0.3549	0.3095	0	0.5	QTgw.cib-6D1
	6D1	18	AX-111368177	AX-111496575	5.493	4.8947	0.5984	1.4648	1.2284	0.2364	0.7072	0.4805	0.3611	-0.4645	-0.0526	0.0888	-0.1886	-0.2246	12.5	18.5
	6D1	50	AX-111696257	AX-110662688	3.1638	2.5641	0.5997	0.7737	0.6408	0.1328	-0.512	-0.1267	0.0465	0.2973	-0.3319	0.3475	-0.0274	-0.2053	47.5	52.5
	7D	2	AX-111564726	AX-89351898	6.8506	6.1211	0.7295	1.5992	1.5063	0.0929	-0.7839	0.2027	0.1363	0.1388	-0.3849	0.1195	-0.133	-0.0794	1.5	2.5
	7D	25	AX-109353584	AX-110864195	2.7249	2.1914	0.5334	0.6279	0.5453	0.0826	-0.4754	0.0151	0.0953	0.2137	-0.2884	-0.2564	0.1854	0.0352	19.5	29.5
	7D	63	AX-110426671	AX-110555929	7.8002	6.3964	1.4038	1.874	1.5908	0.2832	0.8056	-0.4263	0.0693	-0.0877	0.0299	-0.3667	0.6856	0.0959	60.5	64.5	QTgw.cib-7D
	7D	68	AX-110826147	AX-108939858	5.2296	4.0073	1.2223	1.1274	0.9972	0.1303	0.6371	-0.0774	0.1981	0.1319	-0.0395	-0.0191	-0.4763	0.2823	66.5	71.5
	7D	88	AX-109171361	AX-111586377	2.8474	1.4236	1.4238	0.6146	0.3545	0.2601	0.3804	-0.549	0.1274	0.5083	-0.1197	-0.2717	0.2802	0.0244	84.5	91.5
GL	1A	0	AX-112289915	AX-111015470	6.4964	3.6597	2.8367	1.5498	1.3586	0.1912	-0.045	0.0028	-0.0346	-0.0104	0.007	0.0135	0.0213	0.0004	0	3.5
	1A	25	AX-110483667	AX-111072016	2.9377	0.8492	2.0885	0.4061	0.3158	0.0902	-0.0214	0.0152	0.0062	-0.0158	0.007	-0.0161	0.0083	-0.0048	24.5	25.5
	2A	0	AX-89605342	AX-86180346	25.7094	10.9399	14.7695	5.4373	4.1397	1.2976	-0.0775	-0.0387	0.0377	0.0808	0.0089	-0.0495	-0.0345	-0.0047	0	0.5	QGl.cib-2A.1
	2A	18	AX-109405059	AX-94818897	2.5101	1.749	0.7611	0.9848	0.649	0.3359	-0.0307	-0.0436	0.0201	0.0201	-0.0192	-0.0029	0.0131	0.0124	15.5	19.5
	2A	58	AX-89729161	AX-109873869	8.7903	5.1781	3.6122	2.4046	1.9221	0.4825	0.0539	0.0075	0.0462	-0.0137	0.0046	0.0106	-0.0507	-0.0045	57.5	58.5	QGl.cib-2A.2
	2A	63	AX-108936006	AX-86178504	4.8598	4.005	0.8548	2.7565	1.4513	1.3052	0.0469	0.0763	0.0423	-0.0426	0.0189	-0.0543	-0.0079	-0.0327	61.5	63.5
	2A	67	AX-111550859	AX-110458328	3.0392	1.566	1.4731	1.0854	0.5625	0.5228	0.0287	0.0083	0.0478	0.0051	0.017	-0.0331	-0.0395	-0.0056	66.5	68.5
	2A	70	AX-110458328	AX-109977510	12.1006	6.6019	5.4987	2.3621	2.2633	0.0988	0.0576	-0.0198	0.0078	-0.0065	0.0139	0.0099	-0.013	0.0077	69.5	70.5	QGl.cib-2A.3
	2A	94	AX-109879502	AX-110061442	5.8845	2.7048	3.1796	1.0788	1.001	0.0778	0.0383	-0.0064	-0.0179	-0.0089	0.0123	0.0008	0.0092	0.011	92.5	94.5
	2A	98	AX-94754539	AX-109966506	4.7473	3.1113	1.6359	1.2688	1.1506	0.1182	0.0418	0.0118	0.0012	-0.0199	0.0202	-0.0166	-0.0023	0.0055	96.5	98
	4A	29	AX-112288579	AX-112288645	19.5856	11.2043	8.3813	4.4228	4.2906	0.1322	0.079	-0.0076	-0.0105	-0.0052	0.032	0.0048	-0.0092	-0.0042	28.5	29.5	QGl.cib-4A
	4A	52	AX-109941459	AX-95068958	5.0095	1.0425	3.967	1.5698	0.3766	1.1933	-0.0234	0.0854	0.0107	0.0026	-0.0649	-0.0029	-0.0168	-0.0141	51.5	52.5
	4A	55	AX-111692316	AX-89408533	3.4657	0.3896	3.0761	1.1441	0.1418	1.0023	-0.0143	0.0784	0.0151	0.005	-0.0557	-0.0081	-0.0196	-0.0151	54.5	55.5
	5A1	5	AX-108839873	AX-95684258	10.4466	5.2648	5.1819	2.3864	1.9065	0.4799	0.0526	-0.0306	0.0235	-0.0206	0.0282	-0.0382	0.0179	0.0198	3.5	7.5	QGl.cib-5A1
	5A1	38	AX-109578838	AX-94382012	3.3947	0.2229	3.1718	0.755	0.0881	0.6668	-0.0113	0.0254	0.0621	0.0014	-0.0205	-0.0202	-0.0358	-0.0123	35.5	46.5
	5A2	0	AX-109941570	AX-109983844	3.2645	0.4026	2.8618	0.8372	0.149	0.6881	-0.0147	0.0705	0.0103	0.003	-0.0276	-0.0205	-0.0241	-0.0116	0	0.5
	5A2	20	AX-108841395	AX-108811182	2.926	0.3973	2.5288	0.6797	0.1505	0.5292	-0.0148	0.0616	0.0095	-0.0052	-0.0231	-0.0236	-0.0199	0.0006	18.5	21.5
	6A	3	AX-94506461	AX-86168860	2.7653	0.7132	2.0522	1.4301	0.2924	1.1377	-0.0211	-0.0815	-0.0177	-0.01	0.0643	0.0083	0.0283	0.0083	0	8.5
	6A	34	AX-111806104	AX-109838705	28.2681	10.2073	18.0608	5.8466	3.8374	2.0093	0.0776	-0.136	0.0334	0.0058	0.0206	0.0183	0.0267	0.0312	33.5	35.5	QGl.cib-6A.1
	7A	20	AX-109503299	AX-95630649	6.2077	1.5081	4.6996	1.0567	0.5619	0.4948	-0.0289	0.0558	-0.0187	0.0063	0.0097	-0.035	0.0003	-0.0185	19.5	20.5
	7A	97	AX-111675883	AX-110996516	6.2233	5.2383	0.9849	2.0837	1.652	0.4317	0.0491	0.0348	0.0401	-0.027	-0.0006	-0.022	-0.0183	-0.0071	96.5	98.5
	1B	0	AX-94642563	AX-95078610	3.0521	1.1853	1.8668	0.8331	0.4398	0.3933	0.0256	-0.043	-0.0059	-0.0077	0.0455	-0.0019	0.0095	0.0036	0	2.5
	2B	44	AX-179561157	AX-108739838	4.0021	1.5245	2.4776	1.1487	0.5636	0.5851	-0.0286	0.0598	-0.0074	-0.0033	-0.0479	0.0032	-0.0033	-0.001	42.5	45.5
	5B	0	AX-108816181	AX-109859693	5.9265	2.6954	3.2312	1.9134	0.9937	0.9197	-0.0382	0.0654	-0.0235	-0.0021	-0.0641	0.0218	-0.0014	0.0039	0	1.5
	5B	34	AX-108896459	AX-95683887	6.8724	3.6706	3.2018	2.8096	1.3617	1.448	-0.0451	0.0687	-0.0766	0.0138	-0.0568	0.0303	0.0141	0.0064	33.5	34.5
	5B	40	AX-95652462	AX-109908739	5.3073	1.128	4.1793	1.5863	0.4155	1.1708	-0.0246	0.0736	0.0293	-0.0126	-0.0707	0.0085	-0.0107	-0.0173	39.5	41.5
	5B	62	AX-109869482	AX-95166397	4.6708	1.494	3.1768	1.0378	0.5463	0.4915	-0.0281	0.0423	0.0168	0.0045	-0.0432	0.0144	-0.0276	-0.0073	60.5	66.5
	6B	53	AX-110410745	AX-110009911	2.8257	0.8078	2.0179	0.831	0.2988	0.5322	0.0209	-0.0413	-0.0245	-0.0082	0.0535	0.0029	0.0134	0.0042	51.5	54.5
	6B	93	AX-110409758	AX-111521825	3.9701	2.0853	1.8848	3.3263	0.7778	2.5485	-0.0336	-0.1354	-0.0363	0.0212	0.0421	0.0328	0.0437	0.0318	87.5	98	QGl.cib-6B
	7B	8	AX-95172810	AX-109999680	3.6751	3.1888	0.4863	1.7771	1.141	0.6361	-0.0407	-0.0503	-0.0383	0.0164	-0.0035	0.0224	0.0381	0.0152	4.5	14.5
	7B	70	AX-108852057	AX-86167575	2.5092	0.3341	2.1751	0.5366	0.1242	0.4124	-0.0134	0.0405	0.0334	-0.0145	-0.0259	-0.0202	-0.0114	-0.0019	69.5	71.5
	1D	0	AX-111078278	AX-108960892	4.0628	3.3542	0.7086	1.6238	1.2429	0.3809	-0.0424	-0.0108	-0.0286	0.0158	-0.0361	0.0309	0.0168	0.0121	0	5.5
	1D	24	AX-109440131	AX-111543595	5.6648	4.879	0.7858	2.0614	1.5436	0.5178	-0.0474	-0.0199	-0.0517	0.0169	-0.0146	0.0296	0.0247	0.015	17.5	31.5
	1D	51	AX-111094817	AX-86174314	6.9765	4.6022	2.3744	1.8412	1.6858	0.1554	-0.0496	0.009	-0.0315	0.0049	-0.0131	0.012	0.0089	0.0098	49.5	53.5
	2D	11	AX-111416794	AX-111214360	2.9361	0.7448	2.1914	0.4659	0.2673	0.1986	-0.0197	0.0382	0.0085	-0.0042	-0.0077	-0.0131	-0.012	-0.0097	9.5	14.5
	2D	18	AX-111134429	AX-95008796	2.5356	0.5991	1.9365	0.3764	0.1944	0.1819	-0.0169	0.0338	0.0132	-0.0036	-0.0091	-0.0175	-0.0063	-0.0105	17.5	19.5
	2D	71	AX-110010295	AX-110973465	2.9797	0.587	2.3927	2.2924	0.2113	2.0811	-0.018	-0.1306	0.0257	0.0202	0.0613	0.0157	-0.0059	0.0136	68.5	78.5
	2D	116	AX-94646857	AX-111656957	3.3879	2.9302	0.4577	1.6787	1.0666	0.6121	-0.0395	-0.0604	-0.0008	0.0354	-0.0213	0.0268	0.0104	0.01	110.5	116
	3D	6	AX-111489545	AX-109829856	6.1432	2.5161	3.6272	1.3501	0.9359	0.4143	-0.0368	-0.0402	0.0284	-0.0292	0.0253	0.017	-0.0013	-0.0001	4.5	6.5	QGl.cib-3D
	4D	0	AX-89398511	AX-110977051	3.1033	0.4155	2.6877	0.4381	0.1544	0.2836	-0.0154	0.0162	0.0368	-0.0279	0.013	-0.0138	-0.0127	-0.0115	0	1.5
	5D	69	AX-111616614	AX-111756142	2.9253	1.9728	0.9525	1.0135	0.7373	0.2761	-0.0328	-0.0465	0.0057	0.0135	0.0119	0.0168	-0.0043	0.0029	65.5	69.5
	5D	100	AX-109360538	AX-109582768	2.9524	1.9366	1.0158	0.7642	0.6825	0.0816	-0.0317	-0.0067	-0.0019	0.0117	-0.0168	0.0189	-0.0018	-0.0034	96.5	103.5
	6D1	0	AX-109468717	AX-89643022	3.9701	2.1954	1.7747	1.3349	0.813	0.5218	0.0354	-0.0348	0.0238	-0.0055	0.0548	0.0012	-0.0242	-0.0153	0	1.5
	6D1	17	AX-111261865	AX-111368177	9.3484	3.7837	5.5647	2.0274	1.4519	0.5755	0.0459	-0.0357	-0.0295	-0.018	0.0512	-0.0057	0.0182	0.0195	16.5	18.5	QGl.cib-6D1.1
	6D1	28	AX-110564593	AX-110040257	8.4709	7.0836	1.3873	5.6351	2.681	2.9541	0.0624	0.0977	0.092	-0.0492	0.02	-0.034	-0.0621	-0.0644	27.5	28.5	QGl.cib-6D1.2
	6D1	36	AX-110425031	AX-111589242	2.9296	1.4632	1.4664	0.7144	0.5412	0.1732	-0.028	-0.0031	-0.0291	-0.0067	0.0226	0.0182	0.0009	-0.0028	33.5	39.5
	7D	2	AX-111564726	AX-89351898	3.6177	1.651	1.9667	0.6552	0.5997	0.0555	-0.0295	0.0082	-0.0025	0.0157	0.0001	-0.0091	-0.0127	0.0002	1.5	2.5
	7D	22	AX-109353584	AX-110864195	3.1279	0.5265	2.6014	0.5754	0.2065	0.3689	-0.0175	0.0548	0.001	-0.0081	-0.011	-0.0202	-0.001	-0.0155	12.5	31.5	QGl.cib-7A
	7D	60	AX-108755888	AX-110426671	2.9579	1.5166	1.4413	0.8692	0.5517	0.3176	0.0284	0.0276	0.0191	-0.0286	-0.0117	-0.0191	0.0254	-0.0127	59.5	64.5
GW	1A	20	AX-110967932	AX-95198220	3.6825	1.5684	2.1142	0.6534	0.5463	0.1071	0.016	-0.006	-0.0104	0.0021	0.0088	-0.007	0.0065	0.006	19.5	20.5
	1A	24	AX-95237226	AX-108764693	3.1857	1.1417	2.044	0.5542	0.4033	0.1509	0.0138	-0.0118	-0.0113	0.0038	0.0101	-0.0041	0.0091	0.0043	23.5	24.5
	2A	0	AX-89605342	AX-86180346	3.0799	1.4288	1.6512	0.9658	0.5022	0.4636	-0.0154	-0.0172	-0.0069	0.0161	-0.0151	-0.0109	0.0151	0.0188	0	1.5
	2A	9	AX-110917900	AX-110498447	6.1536	1.8171	4.3365	2.0274	0.5987	1.4286	0.0168	-0.0251	-0.0012	-0.0074	0.0568	-0.0276	-0.0022	0.0066	6.5	11.5	QGw.cib-2A.2
	2A	22	AX-94818897	AX-109925910	4.9546	2.004	2.9505	1.4769	0.6924	0.7845	0.0181	-0.0135	0.0417	-0.0073	-0.0039	-0.0234	-0.0011	0.0074	20.5	22.5	QGw.cib-2A.3
	2A	45	AX-109829484	AX-110513027	2.5579	0.45	2.1079	0.768	0.1572	0.6107	0.0086	-0.0398	0.01	0.0108	0.0111	-0.0041	0.0084	0.0036	42.5	46.5
	2A	63	AX-108936006	AX-86178504	8.5457	3.9671	4.5786	2.4052	1.3569	1.0483	0.0259	0.0296	-0.0145	0.0174	0.0196	0.0076	-0.0296	-0.0302	62.5	63.5	QGw.cib-2A.1
	2A	70	AX-110458328	AX-109977510	2.8124	2.0936	0.7188	0.866	0.5791	0.2869	0.0166	0.0085	0.0025	-0.0104	0.0231	-0.0042	-0.0134	-0.0062	69.5	71.5
	2A	94	AX-109879502	AX-110061442	3.8434	1.7079	2.1355	0.7677	0.601	0.1667	0.0169	-0.0163	0.0047	-0.0035	0.0122	0.0048	-0.0073	0.0055	91.5	95.5
	4A	0	AX-94409394	AX-111578911	3.3967	0.3118	3.0848	0.7177	0.1095	0.6082	0.0073	-0.0345	0.0086	0.0108	-0.0168	0.0111	0.015	0.0057	0	0.5
	5A1	18	AX-109411291	AX-94566370	3.8574	0.3644	3.493	1.1233	0.1272	0.996	0.0078	-0.0388	-0.0026	-0.0196	0.034	0.0122	0.005	0.01	17.5	21.5
	5A1	58	AX-86177927	AX-110416548	3.9017	0.6693	3.2324	0.8332	0.2487	0.5846	0.0109	-0.0319	0.0181	0.014	-0.0178	0.0048	0.0082	0.0047	56.5	58.5
	5A1	113	AX-94669612	AX-110169414	2.5641	0.6955	1.8686	0.9345	0.2439	0.6907	-0.0107	0.0125	-0.0173	0.0244	-0.0332	-0.0015	0.0105	0.0047	111.5	113.5
	6A	33	AX-179558821	AX-111806104	13.1848	4.3183	8.8665	2.7259	1.4628	1.2631	0.0272	-0.0592	0.023	0.007	0.0062	0.0165	-0.001	0.0075	31.5	33.5	QGw.cib-6A
	7A	7	AX-111537329	AX-94761033	3.5519	1.6971	1.8548	1.1653	0.5757	0.5896	0.0167	0.0028	-0.0069	-0.0067	0.0365	-0.024	-0.0019	0.0001	2.5	10.5
	7A	32	AX-111558895	AX-112290195	5.5992	2.9282	2.671	1.138	1.0221	0.1159	0.0222	-0.0046	-0.004	-0.0051	0.0128	-0.0101	0.0048	0.0063	30.5	32.5
	7A	63	AX-94523052	AX-110541561	3.1329	1.6492	1.4836	0.8181	0.5801	0.238	0.0165	-0.0047	0.0096	-0.0097	0.015	-0.0177	0.0058	0.0018	62.5	63.5
	7A	67	AX-109918254	AX-86164739	4.1102	1.844	2.2662	0.8133	0.6261	0.1871	0.0173	-0.0136	0.0049	-0.0017	0.011	-0.0141	0.0075	0.0059	66.5	70.5
	7A	97	AX-111675883	AX-110996516	4.4275	3.1483	1.2792	1.1753	0.8865	0.2888	0.0205	0.0108	0.0192	0.0023	-0.0003	-0.0199	-0.0061	-0.0059	96.5	97.5
	1B	86	AX-110941669	AX-94425292	3.5694	1.2276	2.3419	2.2798	0.4269	1.8529	-0.0144	-0.068	0.0019	0.0293	-0.0014	0.0139	0.0247	-0.0003	81.5	87
	2B	0	AX-109454545	AX-178075227	2.9679	0.6944	2.2735	0.7033	0.2442	0.4591	0.0107	-0.0328	-0.0036	0.0058	0.0178	0.0075	0.0005	0.0047	0	4.5
	3B	0	AX-110984638	AX-111080504	3.8051	2.0413	1.7638	0.7833	0.7204	0.0629	0.0189	0.0018	0.005	-0.0116	0.0013	0.0039	-0.0046	0.0043	0	1.5
	3B	47	AX-95658839	AX-108961067	2.5457	1.3684	1.1773	0.5995	0.4811	0.1184	-0.0155	0.0097	-0.0017	0.0051	-0.0161	-0.0022	0.0053	-0.0001	41.5	49.5
	3B	80	AX-109962666	AX-111472967	2.9549	0.9296	2.0254	1.3702	0.3245	1.0457	-0.0125	-0.0354	-0.0201	0.0062	0.0425	-0.0004	0.0048	0.0024	78.5	84.5
	3B	100	AX-110123112	AX-111530972	5.2501	3.6111	1.639	1.3933	1.2689	0.1244	-0.0249	-0.0035	-0.0138	0.0091	-0.0052	0.0098	0.0044	-0.0008	98.5	100.5
	4B	16	AX-110376140	AX-95651710	3.4435	2.1443	1.2992	0.9027	0.735	0.1678	-0.0186	-0.0014	-0.0177	-0.0002	0.0012	0.0017	0.0153	0.001	14.5	17.5
	4B	40	AX-179560851	AX-110990114	2.5601	0.7148	1.8453	0.5213	0.2548	0.2665	-0.011	0.0134	-0.0159	-0.0108	0.0163	0.0049	-0.0069	-0.0009	33.5	41.5
	5B	45	AX-179560339	AX-95629265	5.7227	4.1245	1.5981	2.2661	1.4413	0.8248	0.0264	0.0461	0.0029	-0.0097	-0.02	-0.0033	-0.0115	-0.0046	43.5	46.5
	5B	59	AX-110070373	AX-110433907	3.8701	2.7931	1.0771	1.4306	0.9569	0.4737	0.0212	0.0322	0.0012	-0.0042	-0.0018	-0.0023	-0.0221	-0.003	58.5	60.5
	6B	43	AX-95632065	AX-94740723	4.7722	0.0376	4.7346	1.2639	0.0135	1.2503	0.0026	-0.0511	-0.0116	0.0276	-0.0088	0.0181	0.0176	0.0081	41.5	45.5
	6B	50	AX-94416934	AX-108855762	3.2007	0.0537	3.1469	1.1538	0.0188	1.135	0.003	-0.0542	0.0013	0.0234	0.0056	0.0052	0.0141	0.0046	49.5	52.5
	6B	68	AX-95653739	AX-108960315	3.3096	2.8644	0.4452	1.6495	0.9742	0.6753	-0.0217	-0.0386	0.0007	0.0156	-0.0095	0.0188	0.0093	0.0037	66.5	69.5
	6B	97	AX-111521825	AX-95659492	3.9816	3.3346	0.647	2.6228	1.1524	1.4704	-0.0234	-0.0577	-0.0143	0.0234	0.0027	0.0195	0.0184	0.008	89.5	98
	7B	88	AX-94419578	AX-158601475	3.7025	1.8082	1.8944	0.7253	0.6262	0.099	0.0172	-0.0147	0.0068	0.0045	0.0059	-0.0005	-0.003	0.0009	83.5	92.5
	7B	105	AX-109918671	AX-95659283	3.3872	1.0416	2.3456	0.6637	0.3583	0.3054	0.013	-0.0275	0.0115	-0.0006	0.0011	0.0011	0.005	0.0095	104.5	106.5
	1D	0	AX-111078278	AX-108960892	2.746	1.7261	1.0198	0.8306	0.6082	0.2224	-0.0169	0.0037	-0.007	0.0093	-0.0199	0.0138	0	0.0001	0	5.5
	1D	18	AX-109440131	AX-111543595	5.2352	4.1982	1.037	1.8563	1.3887	0.4676	-0.0257	-0.0172	-0.0029	0.017	-0.0249	0.0168	0.0065	0.0048	14.5	24.5
	1D	51	AX-111094817	AX-86174314	4.6322	1.9033	2.7289	1.0153	0.677	0.3383	-0.0179	0.0253	-0.0196	-0.0007	-0.0038	-0.008	0.0025	0.0043	48.5	54.5
	2D	8	AX-94779177	AX-110671664	3.781	2.8882	0.8928	1.7412	1.0073	0.7339	0.0218	0.0375	0.0176	-0.0133	-0.0182	-0.005	-0.0107	-0.0078	5.5	9.5
	2D	17	AX-111214360	AX-111134429	5.6914	4.5934	1.0979	2.022	1.6061	0.4159	0.0279	0.0175	0.0236	-0.0149	0.002	-0.0146	-0.0095	-0.0042	14.5	18.5
	2D	21	AX-108762451	AX-110340304	5.9336	4.275	1.6587	1.9925	1.5012	0.4913	0.0268	0.0229	0.0237	-0.0137	-0.0141	-0.0116	-0.006	-0.0012	20.5	21.5
	3D	37	AX-109688668	AX-110160363	3.2279	0.5955	2.6324	1.0675	0.1958	0.8717	0.0096	-0.017	0.0247	-0.0143	0.0332	-0.0231	-0.0098	0.0064	35.5	38.5
	4D	0	AX-89398511	AX-110977051	8.5352	4.6593	3.8759	4.3901	1.6402	2.7498	0.0286	0.0405	0.0671	-0.0483	-0.0052	-0.0221	-0.0228	-0.0092	0	1.5
	5D	17	AX-89700472	AX-109562679	3.3527	0.6058	2.7469	0.6386	0.1839	0.4548	0.0094	-0.0261	-0.0085	-0.0103	0.019	0.003	0.0163	0.0065	13.5	22.5
	6D1	0	AX-109468717	AX-89643022	12.1	7.8611	4.2389	3.2037	2.7833	0.4205	0.0374	0.007	0.0151	-0.027	0.0137	-0.0157	0.0011	0.0057	0	0.5	QGw.cib-6D1
	6D1	16	AX-89643022	AX-111261865	5.4216	4.7205	0.7011	2.3896	1.6268	0.7628	0.0277	0.0311	0.0157	-0.0242	0.0143	-0.0063	-0.0142	-0.0164	9.5	18.5
	6D1	28	AX-110564593	AX-110040257	4.5127	4.1867	0.326	2.7811	1.4551	1.326	0.0262	0.0537	0.0117	-0.0247	0.0052	-0.0119	-0.0158	-0.0181	26.5	29.5
	6D2	2	AX-110048049	AX-110119503	2.9179	1.8554	1.0625	0.7261	0.6534	0.0726	-0.0176	-0.0073	0.0004	0.001	-0.0057	0.0079	0.0084	-0.0046	0	6.5
	7D	2	AX-111564726	AX-89351898	3.4905	1.7212	1.7693	0.6847	0.5942	0.0905	-0.0167	-0.0042	0.0117	-0.0044	-0.0046	0.0086	-0.0053	-0.0018	0	2.5
	7D	25	AX-109353584	AX-110864195	3.0822	0.1736	2.9086	0.4968	0.0612	0.4356	-0.0054	0.0217	0.0097	0.003	-0.0108	-0.027	0.006	-0.0026	16.5	34.5	QGw.cib-7D.1
	7D	68	AX-110826147	AX-108939858	8.4354	3.014	5.4214	1.5046	1.0538	0.4508	0.0223	-0.0276	0.0178	0.0014	-0.0046	0.0191	-0.0042	-0.0018	65.5	70.5	QGw.cib-7D.2
	7D	87	AX-109728672	AX-109171361	3.8746	1.1565	2.718	0.8445	0.404	0.4405	0.0138	-0.0287	0.0158	0.017	0.0021	-0.0093	0.0023	0.0008	83.5	89.5
GA	2A	0	AX-89605342	AX-86180346	8.5473	2.6545	5.8928	1.9614	1.3356	0.6258	-0.2179	-0.236	0.0344	-0.0015	0.2593	-0.1327	-0.0363	0.1128	0	0.5	QGa.cib-2A.2
	2A	57	AX-95632103	AX-89729161	4.6396	1.8671	2.7725	1.0944	0.9229	0.1715	0.1853	0.0952	-0.0004	0.0398	-0.142	-0.0294	0.0968	-0.0601	56.5	58.5
	2A	62	AX-111658893	AX-111008831	4.6041	3.0334	1.5707	1.8808	1.1803	0.7005	0.2061	0.3431	-0.0544	-0.0272	0.01	-0.1716	0.0515	-0.1513	61.5	63.5	QGa.cib-2A.3
	2A	70	AX-110458328	AX-109977510	8.0558	3.7724	4.2834	1.6601	1.5825	0.0776	0.2385	-0.0688	-0.0128	0.1069	0.0206	0.0209	-0.0406	-0.0263	69.5	70.5	QGa.cib-2A.4
	2A	94	AX-109879502	AX-110061442	12.0802	4.1845	7.8957	2.253	2.0918	0.1612	0.274	-0.1219	0.0427	-0.0924	0.0986	-0.0013	-0.0002	0.0744	93.5	94.5	QGa.cib-2A.1
	3A	10	AX-108825451	AX-109441469	2.74	0.0002	2.7397	1.4104	0.0006	1.4098	-0.0048	-0.2001	-0.0085	-0.2461	0.4921	-0.114	0.0494	0.0272	3.5	15.5
	3A	13	AX-110377908	AX-110435718	2.822	0.1891	2.6329	1.6101	0.0952	1.5149	-0.0582	0.3771	-0.1168	-0.3976	0.2232	0.032	-0.1104	-0.0074	7.5	15.5
	4A	0	AX-94409394	AX-111578911	3.8575	0.5658	3.2917	0.5833	0.2848	0.2985	0.1016	-0.2017	-0.0368	0.0789	-0.077	0.0805	0.1158	0.0404	0	1.5
	4A	27	AX-95631668	AX-112288579	4.0753	2.4863	1.5889	1.4416	1.1731	0.2684	0.2042	-0.0586	-0.0304	0.1006	0.1939	-0.089	-0.0547	-0.0618	15.5	29.5
	4A	33	AX-108836622	AX-109303147	3.9582	2.5721	1.386	1.5245	1.2924	0.232	0.2149	0.0497	0.006	-0.0058	0.1811	-0.1295	-0.0306	-0.0708	30.5	33.5
	5A1	8	AX-95684258	AX-94406550	7.3077	1.6553	5.6523	1.2329	0.7841	0.4487	0.1669	-0.147	-0.0172	0.1743	-0.1288	0.1546	0.0773	-0.1131	4.5	11.5	QGa.cib-5A1.1
	5A1	18	AX-109411291	AX-94566370	6.6238	2.1687	4.4551	2.1205	1.084	1.0366	0.1976	-0.38	0.0636	0.2419	0.1484	-0.1659	0.0297	0.0623	17.5	20.5	QGa.cib-5A1.2
	5A1	96	AX-110995304	AX-95631051	2.6525	0.869	1.7836	1.1597	0.4328	0.7269	-0.1244	0.2466	0.0422	-0.219	-0.2284	-0.002	0.1366	0.024	94.5	100.5
	5A2	0	AX-109941570	AX-109983844	3.4751	0.0349	3.4402	1.7009	0.0174	1.6835	-0.0249	0.5425	0.1294	-0.1793	-0.2115	-0.1494	-0.0703	-0.0614	0	1.5
	6A	33	AX-179558821	AX-111806104	27.3691	5.0786	22.2905	5.9553	2.6001	3.3552	0.3145	-0.6487	-0.2833	0.537	-0.1033	0.239	0.093	0.1663	32.5	33.5	QGa.cib-6A
	6A	47	AX-109844821	AX-110609622	2.9861	0.2503	2.7358	1.7486	0.1302	1.6184	0.0698	-0.4364	-0.0296	0.0671	0.4666	-0.0973	-0.0009	0.0305	42.5	49.5
	7A	3	AX-179561266	AX-111520161	2.7227	0.6818	2.0409	0.7729	0.326	0.4469	0.1084	-0.1314	-0.1318	0.0881	0.2152	-0.1385	0.0549	0.0436	1.5	8.5
	7A	63	AX-94523052	AX-110541561	3.9219	1.3734	2.5485	0.8868	0.6893	0.1975	0.1564	-0.0388	-0.1136	-0.0275	0.1663	-0.0598	0.0395	0.0339	62.5	63.5
	7A	98	AX-110996516	AX-111168101	5.9652	4.4738	1.4914	3.0158	2.1327	0.8831	0.2754	0.311	0.1875	-0.0986	0.0579	-0.1976	-0.1612	-0.099	96.5	99.5
	1B	38	AX-111128656	AX-111681185	2.538	0.3672	2.1708	1.4382	0.1827	1.2555	-0.082	-0.2252	-0.269	-0.0979	0.409	-0.0181	0.1373	0.0639	34.5	39.5
	3B	69	AX-110463744	AX-95662262	2.9283	0.0038	2.9244	2.7557	0.0031	2.7526	-0.0105	-0.6984	0.0664	0.3062	0.315	-0.0061	0.0235	-0.0067	67.5	69.5
	3B	75	AX-110434937	AX-89586751	2.6178	0.0399	2.5779	2.4456	0.024	2.4216	-0.0298	-0.688	-0.0259	0.2808	0.2485	0.0952	0.0475	0.0419	72.5	78.5
	4B	40	AX-179560851	AX-110990114	3.6456	0.2872	3.3584	0.9235	0.1483	0.7752	-0.0728	0.2369	-0.2637	0.1781	0.0218	0.0679	-0.1561	-0.0848	34.5	41.5
	4B	54	AX-108951008	AX-111013454	3.3324	0.748	2.5844	1.274	0.403	0.871	-0.1196	0.2984	-0.2539	0.0701	-0.1976	0.1326	-0.0375	-0.0121	50.5	57
	5B	0	AX-108816181	AX-109859693	4.093	1.137	2.9561	1.7738	0.5681	1.2058	-0.1428	0.4372	-0.0818	-0.2343	-0.189	0.1162	-0.0226	-0.0257	0	1.5
	5B	26	AX-95659038	AX-108935277	3.7214	0.5107	3.2107	2.2978	0.1737	2.1242	-0.0799	0.5192	-0.0578	-0.066	-0.513	0.0667	0.0338	0.0171	19.5	28.5	QGa.cib-5B
	5B	62	AX-109869482	AX-95166397	2.7969	0.1558	2.6411	1.1322	0.0727	1.0594	-0.0508	0.4113	-0.0742	-0.1674	-0.1594	0.1445	-0.1122	-0.0426	60.5	64.5
	5B	80	AX-95113198	AX-108766352	2.6064	0.2205	2.3859	0.6299	0.1058	0.5241	0.0614	-0.1067	-0.2537	0.0579	0.1351	-0.0352	0.1775	0.0252	77.5	81.5
	6B	66	AX-94823159	AX-94704405	2.8474	0.5545	2.2928	0.6665	0.2772	0.3893	-0.0994	0.1228	0.0612	-0.2381	0.0907	-0.0925	0.0685	-0.0125	63.5	67.5
	6B	94	AX-111521825	AX-95659492	5.5219	1.6953	3.8267	4.5755	0.8797	3.6958	-0.1768	-0.7721	-0.2383	0.3358	0.3034	0.0644	0.2233	0.0836	87.5	98
	1D	0	AX-111078278	AX-108960892	4.5474	2.1526	2.3948	1.9513	1.0774	0.874	-0.1956	-0.0242	-0.0504	0.171	-0.3711	0.2123	0.0207	0.0418	0	4.5
	1D	18	AX-109440131	AX-111543595	5.0839	2.9032	2.1807	1.8267	1.38	0.4468	-0.2229	-0.1228	-0.0986	0.1505	-0.1755	0.1793	0.0338	0.0334	11.5	22.5
	1D	36	AX-109366725	AX-110517056	4.3314	2.9911	1.3403	2.6586	1.4615	1.1971	-0.2279	0.0341	0.0126	-0.4768	-0.0085	0.2037	0.1207	0.1142	35.5	41.5	QGa.cib-1D
	1D	52	AX-86174314	AX-179557993	6.3801	1.8223	4.5578	1.2706	0.9159	0.3547	-0.1811	0.154	-0.0377	0.1591	-0.1835	-0.0603	-0.034	0.0025	49.5	53.5
	1D	62	AX-179557993	AX-109983565	2.7493	0.0067	2.7426	0.9833	0.0028	0.9805	0.01	0.0065	-0.115	0.3669	-0.2386	0.1521	-0.1118	-0.0602	61.5	66.5
	2D	83	AX-110973465	AX-110411457	2.8846	0.6434	2.2412	1.9892	0.317	1.6722	-0.1061	-0.4468	-0.2713	0.2778	0.1333	0.192	0.0128	0.1023	75.5	89.5
	3D	36	AX-109430769	AX-109319838	3.1343	0.0956	3.0388	1.0113	0.0394	0.9719	0.0375	-0.1809	0.3018	0.0897	0.2032	-0.2086	-0.1511	-0.0543	35.5	38.5
	3D	51	AX-111474955	AX-110977679	2.8458	1.0765	1.7692	1.8269	0.5298	1.2971	0.1385	0.3293	0.2158	-0.196	0.182	-0.2206	-0.2067	-0.1037	48.5	56.5
	4D	0	AX-89398511	AX-110977051	2.8759	1.1664	1.7095	1.8219	0.5825	1.2394	0.148	0.2693	0.3569	-0.2222	0.0464	-0.1353	-0.2155	-0.0997	0	2.5
	5D	19	AX-89700472	AX-109562679	3.1661	0.7057	2.4604	0.6521	0.3316	0.3205	0.1088	-0.2373	0.0116	-0.0093	0.1102	0.0038	0.1053	0.0158	15.5	21.5
	5D	99	AX-109360538	AX-109582768	2.5341	1.296	1.2381	0.8623	0.5971	0.2653	-0.1465	0.0134	0.0587	-0.1493	-0.0873	0.1563	-0.0619	0.0702	94.5	105.5
	6D1	0	AX-109468717	AX-89643022	5.4429	3.4239	2.019	2.3294	1.7154	0.614	0.2547	0.1474	0.1856	-0.1839	0.1847	-0.0825	-0.1292	-0.1221	0	1.5
	6D1	17	AX-111261865	AX-111368177	11.5775	5.5758	6.0016	3.1842	2.7649	0.4193	0.3134	0.2343	-0.1368	-0.0935	0.0801	-0.1212	0.0262	0.0109	16.5	18.5	QGa.cib-6D1
	6D1	28	AX-110564593	AX-110040257	15.5328	8.0304	7.5024	9.8802	4.0615	5.8187	0.38	0.3816	0.9398	-0.3325	-0.0705	-0.1922	-0.4029	-0.3233	27.5	28.5	QGa.cib-6D1.1
	6D1	36	AX-110425031	AX-111589242	6.9239	0.6721	6.2518	3.9966	0.3247	3.6719	-0.1074	0.5063	-0.7905	0.0002	0.0415	0.1651	0.0392	0.0382	35.5	37.5	QGa.cib-6D1.2
	7D	2	AX-111564726	AX-89351898	4.3709	1.6307	2.7402	0.9251	0.801	0.1241	-0.1689	0.0561	0.1092	-0.1223	-0.0207	0.0001	-0.0215	-0.0008	1.5	2.5
	7D	6	AX-110904692	AX-109857529	2.9224	0.6279	2.2944	0.8507	0.3127	0.538	-0.1056	0.1351	0.1636	-0.2876	0.0352	-0.0708	0.019	0.0055	4.5	7.5
	7D	23	AX-109353584	AX-110864195	3.7655	0.1706	3.5949	1.1252	0.0855	1.0396	-0.0558	0.3978	0.03	-0.2763	0.0552	-0.1471	0.0068	-0.0665	14.5	29.5
	7D	62	AX-110426671	AX-110555929	4.8033	2.0789	2.7245	1.2248	1.0462	0.1786	0.193	-0.0622	-0.018	0.0221	0.1232	-0.1216	0.0927	-0.0361	59.5	64.5
	7D	69	AX-110826147	AX-108939858	4.1948	1.8954	2.2993	1.0509	0.8829	0.168	0.1772	-0.1148	0.0454	0.0993	0.0457	-0.1046	0.0549	-0.0259	65.5	72.5
GD	2A	0	AX-89605342	AX-86180346	8.1346	2.82	5.3147	1.9185	1.36	0.5584	-0.03	-0.0298	0.007	0.0029	0.0304	-0.0198	-0.0071	0.0164	0	0.5	QGd.cib-2A.3
	2A	26	AX-109925910	AX-94998685	2.6275	0.3646	2.2629	1.492	0.1732	1.3188	0.0107	-0.0178	0.0398	-0.0362	0.0493	-0.0182	-0.0091	-0.0078	20.5	33.5
	2A	57	AX-95632103	AX-89729161	4.0365	1.9268	2.1097	1.1038	0.9122	0.1917	0.0251	0.0167	0.0001	0.0011	-0.0179	-0.0054	0.0146	-0.0092	56.5	59.5
	2A	62	AX-111658893	AX-111008831	4.6875	3.2142	1.4733	1.917	1.2058	0.7113	0.0284	0.0466	-0.0073	-0.0058	0.0014	-0.0231	0.0093	-0.0212	61.5	63.5
	2A	70	AX-110458328	AX-109977510	8.4952	4.4807	4.0145	1.8358	1.7929	0.0429	0.0346	-0.0079	-0.0008	0.0085	0.0046	0.0032	-0.0054	-0.0023	69.5	70.5	QGd.cib-2A.1
	2A	94	AX-109879502	AX-110061442	13.3177	5.5825	7.7353	2.9475	2.6661	0.2814	0.0422	-0.0182	0.0045	-0.0174	0.0236	0	-0.0023	0.0098	93.5	94.5	QGd.cib-2A.2
	3A	10	AX-108825451	AX-109441469	2.7828	0.0045	2.7783	1.375	0.0014	1.3736	0.001	-0.0265	-0.0006	-0.0315	0.0668	-0.0171	0.0065	0.0024	8.5	15.5
	3A	13	AX-110377908	AX-110435718	2.7472	0.238	2.5092	1.4606	0.1151	1.3455	-0.0087	0.0531	-0.0157	-0.0483	0.0229	0.0054	-0.0163	-0.0011	7.5	15.5
	4A	0	AX-94409394	AX-111578911	3.7994	0.7485	3.0509	0.594	0.3611	0.233	0.0156	-0.0226	-0.0077	0.0065	-0.0083	0.0112	0.0164	0.0046	0	1.5
	4A	33	AX-108836622	AX-109303147	3.6066	2.5488	1.0578	1.4518	1.2267	0.2251	0.0285	0.0069	0.0034	-0.0043	0.0236	-0.0181	-0.0031	-0.0085	31.5	33.5
	5A1	8	AX-95684258	AX-94406550	7.4772	2.0293	5.4479	1.2985	0.9255	0.373	0.0247	-0.017	-0.0027	0.0169	-0.0133	0.0231	0.0108	-0.0177	4.5	11.5	QGd.cib-5A1.1
	5A1	18	AX-109411291	AX-94566370	6.7261	2.4097	4.3164	2.078	1.1551	0.9229	0.0278	-0.0496	0.0109	0.0272	0.0173	-0.0232	0.0056	0.0116	17.5	20.5	QGd.cib-5A1.2
	5A1	97	AX-95631051	AX-94589819	2.632	0.8239	1.808	1.0718	0.3768	0.695	-0.0158	0.034	0.0068	-0.0256	-0.0325	-0.0018	0.0179	0.0014	94.5	100.5
	5A2	0	AX-109941570	AX-109983844	3.5374	0.079	3.4584	1.6193	0.0377	1.5816	-0.005	0.0706	0.0182	-0.0186	-0.033	-0.0204	-0.0091	-0.0078	0	1.5
	6A	4	AX-94506461	AX-86168860	2.603	1.0525	1.5505	1.737	0.5048	1.2321	-0.0187	-0.0398	-0.0274	-0.0223	0.0511	0.0145	0.0169	0.0071	0	5.5
	6A	33	AX-179558821	AX-111806104	27.5929	6.5681	21.0248	6.0617	3.2153	2.8464	0.0477	-0.0833	-0.042	0.0601	-0.0028	0.0325	0.0117	0.0238	32.5	33.5	QGd.cib-6A
	6A	47	AX-109844821	AX-110609622	3.3605	0.3735	2.987	1.8208	0.1822	1.6386	0.0113	-0.0541	-0.0067	0.0067	0.0682	-0.0168	-0.0017	0.0044	42.5	49.5
	7A	3	AX-179561266	AX-111520161	2.6659	0.6963	1.9696	0.8184	0.3139	0.5045	0.0145	-0.0167	-0.0208	0.0084	0.033	-0.0193	0.009	0.0063	1.5	8.5
	7A	63	AX-94523052	AX-110541561	4.1889	1.6657	2.5232	1.1026	0.8013	0.3013	0.023	-0.0048	-0.0153	-0.0112	0.0295	-0.009	0.0053	0.0055	62.5	63.5
	7A	69	AX-110696985	AX-110523034	2.8534	0.932	1.9214	0.8782	0.4476	0.4306	0.0173	-0.014	-0.0056	-0.0167	0.0361	-0.0116	0.0074	0.0044	66.5	72.5
	7A	98	AX-110996516	AX-111168101	5.7799	4.406	1.3739	2.7955	2.0036	0.7919	0.0364	0.0398	0.0273	-0.0154	0.0022	-0.025	-0.019	-0.01	96.5	99.5
	1B	38	AX-111128656	AX-111681185	2.7605	0.4215	2.339	1.4416	0.2009	1.2407	-0.0117	-0.0246	-0.0396	-0.0135	0.0559	-0.0047	0.0193	0.0073	34.5	39.5
	3B	69	AX-110463744	AX-95662262	2.9767	0.005	2.9716	2.5685	0.0033	2.5652	-0.0015	-0.0916	0.0098	0.0381	0.0438	-0.0026	0.0032	-0.0007	67.5	69.5
	3B	75	AX-110434937	AX-89586751	2.5232	0.0463	2.4769	2.2321	0.0257	2.2064	-0.0042	-0.0895	-0.0038	0.0348	0.0341	0.0115	0.0067	0.0062	72.5	78.5
	4B	40	AX-179560851	AX-110990114	3.5004	0.4573	3.0431	1.0069	0.2236	0.7833	-0.0122	0.0285	-0.0358	0.0293	-0.0046	0.0126	-0.0207	-0.0092	34.5	41.5
	4B	54	AX-108951008	AX-111013454	3.3024	0.8707	2.4316	1.3494	0.4429	0.9065	-0.0171	0.0352	-0.0339	0.0157	-0.0326	0.0214	-0.0053	-0.0006	51.5	57
	5B	0	AX-108816181	AX-109859693	5.2543	1.9819	3.2724	2.2864	0.9466	1.3398	-0.0251	0.057	-0.0077	-0.0251	-0.0436	0.0203	0.0002	-0.0012	0	1.5
	5B	33	AX-111053956	AX-108884605	4.0734	1.4423	2.6311	2.2983	0.6712	1.627	-0.0214	0.0543	-0.0303	-0.0225	-0.0496	0.0269	0.011	0.0101	28.5	34.5	QGd.cib-5B
	5B	53	AX-95209369	AX-95630792	2.6409	0.7728	1.8681	1.208	0.365	0.8431	-0.0155	0.037	-0.0299	-0.0042	-0.0306	0.0256	-0.0019	0.0039	50.5	53.5
	5B	62	AX-109869482	AX-95166397	3.5502	0.4424	3.1078	1.5494	0.196	1.3533	-0.0114	0.057	-0.0062	-0.0171	-0.0437	0.0244	-0.0127	-0.0017	60.5	64.5
	6B	66	AX-94823159	AX-94704405	2.7836	0.6485	2.135	0.6246	0.311	0.3136	-0.0144	0.0136	0.0073	-0.0281	0.0126	-0.0123	0.0102	-0.0033	63.5	67.5	QGd.cib-6B
	6B	94	AX-111521825	AX-95659492	5.3638	1.9412	3.4227	4.1881	0.9569	3.2312	-0.0251	-0.0971	-0.0332	0.0468	0.0315	0.0096	0.0316	0.0108	87.5	98
	1D	0	AX-111078278	AX-108960892	3.8937	1.9834	1.9103	1.6304	0.9524	0.678	-0.0251	-0.0075	-0.0084	0.0246	-0.0399	0.0282	-0.0002	0.0033	0	4.5
	1D	18	AX-109440131	AX-111543595	5.0302	2.9977	2.0325	1.7814	1.3747	0.4067	-0.0303	-0.0188	-0.0158	0.0218	-0.015	0.0244	0.0023	0.0012	13.5	23.5
	1D	36	AX-109366725	AX-110517056	4.3628	2.8699	1.4929	2.3182	1.3477	0.9706	-0.0298	0.0028	-0.0009	-0.0585	0.0058	0.0272	0.0131	0.0106	35.5	41.5	QGd.cib-1D.1
	1D	51	AX-111094817	AX-86174314	6.3744	2.2014	4.173	1.3948	1.0689	0.3259	-0.0267	0.0186	-0.0101	0.0241	-0.0202	-0.008	-0.0045	0.0001	49.5	53.5	QGd.cib-1D.2
	1D	62	AX-179557993	AX-109983565	2.7954	0.0037	2.7918	0.9192	0.0014	0.9178	0.0009	-0.0019	-0.0164	0.0474	-0.0296	0.0235	-0.0158	-0.0072	61.5	65.5
	2D	83	AX-110973465	AX-110411457	3.0502	0.9385	2.1117	2.0312	0.4421	1.589	-0.0171	-0.0567	-0.0379	0.0389	0.0082	0.0287	0.0023	0.0164	75.5	89.5
	3D	36	AX-109430769	AX-109319838	3.2065	0.1125	3.094	1.1527	0.0457	1.107	0.0055	-0.029	0.0424	0.0122	0.0311	-0.0296	-0.0217	-0.0054	35.5	38.5
	3D	51	AX-111474955	AX-110977679	2.7493	0.9182	1.8311	1.6071	0.4326	1.1745	0.0171	0.039	0.032	-0.0257	0.0233	-0.0303	-0.0272	-0.011	47.5	56.5
	4D	0	AX-89398511	AX-110977051	3.179	1.3609	1.8181	1.9492	0.6505	1.2987	0.0213	0.0332	0.0538	-0.0293	0.0046	-0.0196	-0.0306	-0.0121	0	4.5
	5D	19	AX-89700472	AX-109562679	3.3873	0.9898	2.3975	0.8383	0.443	0.3954	0.0171	-0.0334	0.0025	-0.0048	0.0218	-0.0013	0.0145	0.0008	14.5	22.5
	6D1	0	AX-109468717	AX-89643022	5.7165	3.879	1.8375	2.5402	1.8593	0.6809	0.0361	0.02	0.0271	-0.0283	0.0266	-0.0119	-0.0174	-0.0161	0	1.5
	6D1	17	AX-111261865	AX-111368177	11.5223	6.053	5.4692	3.3292	2.8786	0.4505	0.0436	0.0288	-0.0181	-0.0192	0.0154	-0.0164	0.0056	0.0039	16.5	18.5	QGd.cib-6D1.1
	6D1	28	AX-110564593	AX-110040257	15.5382	8.1732	7.365	10.1096	3.9595	6.1501	0.0511	0.0503	0.1338	-0.0491	-0.0131	-0.0244	-0.0546	-0.043	27.5	28.5	QGd.cib-6D1.2
	6D1	36	AX-110425031	AX-111589242	7.1569	1.0079	6.149	4.2137	0.4701	3.7436	-0.0176	0.0655	-0.1107	0.0005	0.0059	0.0249	0.0072	0.0067	35.5	37.5	QGd.cib-6D1.3
	7D	2	AX-111564726	AX-89351898	4.3533	1.8826	2.4707	0.9754	0.8873	0.088	-0.0242	0.0054	0.0135	-0.0134	-0.0014	-0.0003	-0.0037	-0.0001	1.5	2.5
	7D	6	AX-110904692	AX-109857529	2.9978	0.7703	2.2275	0.8386	0.3677	0.4709	-0.0156	0.017	0.0236	-0.035	0.0007	-0.0101	0.0028	0.0009	4.5	7.5
	7D	24	AX-109353584	AX-110864195	3.8807	0.2991	3.5817	1.0169	0.1417	0.8752	-0.0098	0.0512	0.0041	-0.0308	0.0033	-0.0205	0.0026	-0.0099	17.5	29.5
	7D	62	AX-110426671	AX-110555929	4.8841	2.471	2.4132	1.4071	1.1851	0.222	0.028	-0.0082	-0.0024	-0.0006	0.021	-0.017	0.0135	-0.0064	59.5	64.5
	7D	69	AX-110826147	AX-108939858	4.4626	2.3961	2.0665	1.2547	1.0675	0.1872	0.0266	-0.0161	0.0059	0.0096	0.0131	-0.015	0.0075	-0.005	65.5	72.5
GP	1A	1	AX-112289915	AX-111015470	2.8264	1.4261	1.4003	0.9819	0.6143	0.3676	-0.0745	0.0222	-0.0135	-0.1267	0.0765	0.0065	0.0215	0.0135	0	7.5
	2A	0	AX-89605342	AX-86180346	16.2149	6.9276	9.2874	3.6956	3.1612	0.5344	-0.1674	-0.1112	0.0264	0.04	0.0928	-0.0747	-0.031	0.0578	0	0.5	QGp.cib-2A.1
	2A	57	AX-95632103	AX-89729161	6.5337	3.214	3.3197	1.6559	1.4411	0.2148	0.1156	0.0414	0.0361	-0.0122	-0.0626	-0.0269	0.0661	-0.042	56.5	57.5
	2A	63	AX-108936006	AX-86178504	3.7063	3.1937	0.5126	2.199	1.416	0.7831	0.1146	0.1741	0.0321	-0.0227	0.0297	-0.0986	-0.0277	-0.087	61.5	63.5	QGp.cib-2A.4
	2A	70	AX-110458328	AX-109977510	9.5869	4.6728	4.9141	1.9572	1.8786	0.0786	0.1297	-0.0319	-0.0106	0.0249	0.0097	0.0398	-0.0382	0.0062	69.5	70.5	QGp.cib-2A.2
	2A	94	AX-109879502	AX-110061442	10.3891	4.5548	5.8343	2.232	2.0651	0.1669	0.1359	-0.0114	0.0107	-0.0583	0.0418	0.0016	-0.0419	0.0576	93.5	94.5	QGp.cib-2A.3
	3A	16	AX-179558913	AX-109366295	3.2054	0.3882	2.8172	1.4198	0.1745	1.2454	-0.0398	0.127	-0.0146	-0.1969	0.1478	-0.0099	-0.0432	-0.0102	11.5	26.5
	4A	1	AX-94409394	AX-111578911	3.1629	0.3894	2.7735	0.4049	0.1678	0.2371	0.0386	-0.075	-0.0192	-0.0297	-0.0187	0.0411	0.0697	0.0317	0	4.5
	4A	30	AX-94400142	AX-94407690	8.4279	4.0617	4.3662	2.0526	1.8448	0.2078	0.1279	0.0202	-0.0862	0.0274	0.0486	0.0323	-0.02	-0.0222	29.5	31.5	QGp.cib-4A
	4A	52	AX-109941459	AX-95068958	2.7105	0.199	2.5115	0.8269	0.0884	0.7385	-0.028	0.1729	-0.0032	0.0376	-0.1017	-0.0504	-0.0347	-0.0205	50.5	52.5
	5A1	9	AX-95684258	AX-94406550	13.2597	5.0842	8.1755	2.5349	2.2288	0.3061	0.1405	-0.0931	0.0317	0.0506	-0.0522	0.0516	-0.0196	0.031	7.5	11.5	QGp.cib-5A1
	5A1	18	AX-109411291	AX-94566370	4.1518	2.4391	1.7127	1.9047	1.0981	0.8066	0.0993	-0.1285	0.0648	0.1234	0.0749	-0.0753	-0.0007	-0.0586	17.5	21.5
	5A1	97	AX-95631051	AX-94589819	2.7629	1.2211	1.5418	1.2213	0.5191	0.7022	-0.0681	0.1152	0.0289	-0.1198	-0.1066	0.0374	0.0513	-0.0063	94.5	100.5
	5A1	115	AX-110920240	AX-111799065	2.6078	1.7637	0.8441	1.0618	0.7933	0.2686	-0.0839	0.0158	0.0163	-0.0385	-0.0979	0.063	0.0326	0.0087	114.5	115
	5A2	0	AX-109941570	AX-109983844	3.9283	0.2809	3.6473	1.2237	0.1267	1.0969	-0.0335	0.2001	0.0941	-0.076	-0.0806	-0.0562	-0.0263	-0.055	0	0.5
	6A	4	AX-94506461	AX-86168860	2.7215	1.3713	1.3502	1.7888	0.6198	1.1689	-0.076	-0.1602	-0.0956	-0.0702	0.165	0.0531	0.0714	0.0365	0	8.5
	6A	33	AX-179558821	AX-111806104	29.9458	7.5147	22.4311	6.497	3.5248	2.9722	0.1829	-0.3165	-0.1457	0.2127	-0.0419	0.1187	0.0834	0.0893	32.5	33.5	QGp.cib-6A
	6A	47	AX-109844821	AX-110609622	3.6328	0.7745	2.8582	1.6198	0.3489	1.271	0.057	-0.2097	0.001	0.0362	0.1876	-0.0452	0.0191	0.0109	43.5	49.5
	7A	20	AX-109503299	AX-95630649	3.939	0.5286	3.4104	1.0433	0.2391	0.8042	-0.0467	0.1693	-0.107	-0.0441	0.0667	-0.0664	0.0008	-0.0193	18.5	20.5
	7A	63	AX-94523052	AX-110541561	3.3108	1.2418	2.069	0.7675	0.5643	0.2032	0.0707	-0.0192	-0.0523	-0.0156	0.0702	-0.0464	0.0407	0.0226	62.5	63.5
	7A	76	AX-110523034	AX-109961435	2.7537	0.0415	2.7122	1.4873	0.0185	1.4687	0.013	0.2453	0.0485	-0.1388	0.0062	-0.0981	-0.0373	-0.0257	75.5	79.5
	7A	98	AX-110996516	AX-111168101	6.5796	4.9561	1.6235	2.9527	2.1786	0.7741	0.1389	0.1263	0.1043	-0.0632	0.0366	-0.0802	-0.0916	-0.0322	96.5	98.5
	3B	69	AX-110463744	AX-95662262	2.6996	0.0002	2.6994	2.1402	0.0004	2.1397	-0.002	-0.3086	0.0282	0.148	0.1204	-0.0135	0.0137	0.0118	67.5	69.5
	3B	75	AX-110434937	AX-89586751	2.8748	0.0341	2.8407	1.8021	0.0142	1.788	0.0114	-0.3002	-0.0075	0.1211	0.0823	0.0212	0.0443	0.0387	72.5	79.5
	4B	54	AX-108951008	AX-111013454	3.4097	1.2443	2.1653	1.2133	0.5825	0.6308	-0.0718	0.1132	-0.1011	0.0462	-0.1041	0.0537	0.0057	-0.0137	52.5	57
	5B	0	AX-108816181	AX-109859693	5.3303	2.3246	3.0057	1.982	1.048	0.934	-0.0969	0.1802	-0.0421	-0.115	-0.077	0.0708	-0.0103	-0.0066	0	2.5
	5B	26	AX-95659038	AX-108935277	4.3684	1.2467	3.1217	2.1281	0.4565	1.6716	-0.0647	0.2045	-0.0198	-0.041	-0.2431	0.0551	0.0319	0.0124	19.5	28.5
	5B	34	AX-108896459	AX-95683887	3.2322	1.1967	2.0355	1.4293	0.5424	0.8868	-0.0704	0.1401	-0.126	-0.1253	0.0485	0.0532	0.0172	-0.0077	30.5	34.5
	5B	62	AX-109869482	AX-95166397	3.8426	1.2296	2.613	1.0843	0.5295	0.5547	-0.0685	0.1372	-0.0224	-0.0571	-0.0624	0.0665	-0.0589	-0.0031	59.5	64.5
	6B	60	AX-86173566	AX-95659326	2.8359	0.172	2.6639	0.6361	0.0788	0.5572	-0.0264	0.0668	0.023	-0.1083	0.0975	-0.0768	0.0336	-0.0358	59.5	60.5
	6B	66	AX-94823159	AX-94704405	3.618	0.5607	3.0574	0.92	0.2521	0.6679	-0.0473	0.128	0.0093	-0.1274	0.0635	-0.0631	0.0145	-0.0249	65.5	66.5
	6B	93	AX-110409758	AX-111521825	4.328	1.3022	3.0258	3.6148	0.5916	3.0232	-0.0724	-0.3534	-0.101	0.1577	0.1349	0.0457	0.0745	0.0416	87.5	98	QGp.cib-6B
	7B	7	AX-94902381	AX-95172810	2.5604	1.408	1.1523	1.3979	0.6355	0.7623	-0.0751	-0.1577	-0.0589	0.1161	-0.0104	0.0135	0.0657	0.0316	4.5	13.5
	1D	19	AX-109440131	AX-111543595	5.5704	3.4075	2.1629	1.8614	1.4423	0.4191	-0.1137	-0.0589	-0.0638	0.0939	-0.0659	0.0734	0.0104	0.0109	11.5	24.5
	1D	36	AX-109366725	AX-110517056	5.6891	4.233	1.4561	2.923	1.8909	1.0321	-0.1294	0.0262	-0.0296	-0.2169	0.0158	0.0805	0.084	0.0401	35.5	40.5	QGp.cib-1D
	1D	52	AX-86174314	AX-179557993	6.0096	2.5663	3.4434	1.5572	1.158	0.3992	-0.1017	0.0264	-0.0363	0.1074	-0.1043	0.0063	0.0155	-0.0152	49.5	53.5
	2D	83	AX-110973465	AX-110411457	3.0027	0.2422	2.7605	1.8153	0.1071	1.7082	-0.0308	-0.2478	-0.1021	0.1372	0.0419	0.0946	0.0098	0.0663	76.5	90.5
	2D	116	AX-94646857	AX-111656957	3.3707	1.9417	1.429	1.22	0.8684	0.3516	-0.0882	-0.1202	0.0367	0.0229	0.0079	0.0631	-0.0336	0.0232	109.5	116
	3D	7	AX-110387704	AX-109334326	3.7701	1.4504	2.3198	1.0943	0.6578	0.4365	-0.0763	-0.1094	0.0369	-0.0063	0.106	0.0026	-0.0465	0.0167	4.5	8.5
	3D	11	AX-111032603	AX-109928860	3.6204	0.7475	2.8729	0.9475	0.3595	0.588	-0.0564	-0.102	0.068	-0.0194	0.1328	-0.0289	-0.051	0.0006	9.5	12.5
	3D	50	AX-109201791	AX-111474955	2.9077	0.4344	2.4732	1.4424	0.1964	1.246	0.042	0.1509	0.1299	-0.1093	0.0733	-0.0953	-0.0997	-0.0498	47.5	54.5
	5D	20	AX-109562679	AX-108930462	3.212	1.2429	1.9691	0.706	0.5532	0.1527	0.0701	-0.0825	0.0034	0.0068	0.0422	-0.0065	0.0266	0.0099	17.5	20.5
	5D	105	AX-111019979	AX-110409786	3.4109	2.0135	1.3975	1.0902	0.9002	0.19	-0.0906	0.0471	0.0208	-0.0409	-0.0804	0.0336	0.0075	0.0124	98.5	107
	6D1	17	AX-111261865	AX-111368177	10.1351	3.7511	6.384	2.1442	1.717	0.4272	0.1233	-0.1028	-0.0352	-0.0186	0.0806	-0.0312	0.0772	0.0299	16.5	17.5	QGp.cib-6D1.1
	6D1	28	AX-110564593	AX-110040257	16.3312	9.1833	7.1479	10.4498	4.2745	6.1753	0.1946	0.2058	0.4778	-0.1657	-0.0285	-0.1124	-0.2046	-0.1724	27.5	28.5	QGp.cib-6D1.2
	6D1	35	AX-110040257	AX-111615617	7.104	2.808	4.296	3.561	1.2838	2.2773	-0.1067	0.0165	-0.3407	0.0517	0.0902	0.1066	0.0383	0.0374	32.5	35.5	QGp.cib-6D1.2
	7D	21	AX-109353584	AX-110864195	5.0214	0.7114	4.3101	1.1492	0.3228	0.8265	-0.0543	0.1745	0.0203	-0.1192	0.0309	-0.0794	-0.0062	-0.0209	16.5	26.5	QGp.cib-7D.1
	7D	60	AX-108755888	AX-110426671	4.8937	2.5767	2.317	1.4001	1.151	0.2492	0.1013	0.0543	-0.0118	-0.0354	0.0325	-0.068	0.0649	-0.0364	59.5	63.5	QGp.cib-7D.2
GR	1A	1	AX-112289915	AX-111015470	7.3453	6.5649	0.7804	1.4093	1.3475	0.0618	0.0036	0.0001	-0.0012	0.0003	-0.0003	0.0015	-0.0002	-0.0002	0	4.5
	1A	17	AX-110442306	AX-108893454	6.1387	5.2778	0.8608	1.2216	1.0907	0.1309	0.0032	0.0015	-0.002	0.001	-0.0001	0.0008	-0.0006	-0.0007	16.5	17.5
	1A	20	AX-110967932	AX-95198220	6.1448	5.5125	0.6323	1.2445	1.1544	0.0901	0.0033	0.0011	-0.0015	0.0009	0.0002	0.0007	-0.0008	-0.0007	19.5	20.5
	1A	24	AX-95237226	AX-108764693	5.1309	4.587	0.5438	1.0567	0.9688	0.0879	0.003	0.0006	-0.0016	0.0008	0.0005	0.001	-0.0003	-0.0009	23.5	24.5
	1A	26	AX-108820130	AX-111632641	3.808	3.2655	0.5425	0.7798	0.6925	0.0873	0.0025	0.0004	-0.0014	0.0009	0.0002	0.0013	-0.0004	-0.001	25.5	26.5
	2A	10	AX-110917900	AX-110498447	35.8247	33.0403	2.7844	8.1565	7.2316	0.9249	0.0082	-0.001	0.0018	-0.0045	0.0053	-0.0026	0.0001	0.0009	8.5	11.5	QGr.cib-2A
	2A	56	AX-109844516	AX-95632103	2.644	2.3816	0.2625	0.5696	0.5023	0.0673	-0.0022	0.0003	0.0002	0.0015	-0.001	-0.0011	-0.0003	0.0003	53.5	56.5
	3A	3	AX-110078548	AX-110522310	4.2014	2.9115	1.2899	0.8435	0.6111	0.2323	0.0024	0.0012	-0.0006	0.0002	-0.0023	0.0028	-0.0009	-0.0003	1.5	6.5
	3A	23	AX-109366295	AX-111541125	4.803	4.2671	0.5359	0.9781	0.8893	0.0888	0.0029	0.0002	0.0002	0	0.0003	0.0017	-0.0016	-0.0007	19.5	31.5
	4A	29	AX-112288579	AX-112288645	12.9078	10.6221	2.2858	2.6784	2.2677	0.4106	-0.0046	-0.0006	0.0007	-0.001	-0.0015	-0.0014	0.0045	-0.0006	28.5	29.5	QGr.cib-4A
	4A	36	AX-108909164	AX-110471504	4.5967	2.3275	2.2692	1.1457	0.487	0.6588	-0.0021	-0.0027	-0.0022	0.0018	-0.0035	0.0021	0.003	0.0015	33.5	37.5
	4A	47	AX-94450390	AX-89512073	2.9362	1.8093	1.1268	0.7717	0.3837	0.388	-0.0019	-0.0018	-0.001	0.0015	-0.0034	0.0015	0.0016	0.0016	46.5	48.5
	4A	54	AX-111692316	AX-89408533	3.5266	1.4072	2.1194	0.6905	0.2768	0.4136	-0.0016	-0.0029	-0.0023	0.0025	-0.0013	0.0018	0.0013	0.0008	52.5	54.5
	5A1	0	AX-111158819	AX-108839873	21.03	19.2109	1.8191	4.6989	4.2061	0.4928	-0.0063	0.0011	-0.0041	0.002	-0.0018	0.0027	0.0004	-0.0004	0	1.5	QGr.cib-5A1
	5A1	63	AX-111574487	AX-109620371	4.3458	3.3781	0.9678	0.8454	0.7153	0.1301	0.0026	0.0004	-0.0016	0.0013	-0.0004	0.0018	-0.0006	-0.0009	60.5	67.5
	5A2	25	AX-109844444	AX-108821689	2.9169	2.155	0.7618	0.5732	0.4549	0.1182	0.0021	0.0012	-0.0022	0.0009	-0.0001	-0.0003	0.0006	-0.0001	22.5	25
	6A	47	AX-109844821	AX-110609622	3.6388	3.2236	0.4152	0.7418	0.6728	0.069	-0.0026	-0.0006	-0.0009	0.0004	0.0014	-0.0002	-0.0009	0.0008	39.5	49.5
	7A	20	AX-109503299	AX-95630649	5.4503	5.066	0.3843	1.2374	1.0679	0.1696	0.0032	0.0004	-0.001	-0.0009	0.0026	0.0008	-0.0012	-0.0007	18.5	20.5
	7A	81	AX-111033260	AX-179558312	2.5699	2.1125	0.4574	0.5576	0.4502	0.1075	-0.0021	-0.0021	-0.0004	0.0002	0.0014	0.0002	0.0003	0.0004	79.5	84.5
	1B	0	AX-94642563	AX-95078610	2.6974	1.4381	1.2593	0.5944	0.3052	0.2893	-0.0017	-0.0024	-0.0007	0.0019	0.0028	-0.0009	-0.0009	0.0001	0	1.5
	1B	51	AX-108850875	AX-89440548	3.041	2.599	0.442	0.6597	0.5502	0.1096	-0.0023	-0.0005	0.0002	0.0021	-0.0005	-0.0007	-0.0011	0.0006	49.5	52.5
	1B	73	AX-95685240	AX-110918755	3.5746	0.5668	3.0078	0.6566	0.1252	0.5313	-0.0011	-0.0021	-0.0011	0.0036	-0.0015	0.0034	-0.0017	-0.0007	68.5	74.5
	1B	85	AX-111642604	AX-110941669	3.13	2.1603	0.9697	0.7143	0.457	0.2573	-0.0021	-0.0026	-0.001	0.002	-0.0009	0.002	0.0007	-0.0002	83.5	87
	2B	0	AX-109454545	AX-178075227	2.7091	1.9148	0.7943	0.5497	0.407	0.1427	0.002	0.0001	-0.0018	0.0011	0.0004	0.0019	-0.001	-0.0006	0	2.5
	2B	59	AX-86179354	AX-86164309	5.6674	4.4812	1.1862	1.1184	0.8924	0.226	0.0029	0.001	-0.0004	-0.002	0.0024	-0.0018	0.0003	0.0006	51.5	64.5
	3B	102	AX-109998884	AX-110397603	4.3611	3.8912	0.4698	0.9422	0.8075	0.1347	-0.0028	-0.0013	0.0005	0.0012	-0.0003	-0.0019	0.0009	0.001	101.5	103.5
	5B	33	AX-111053956	AX-108884605	4.9705	3.5643	1.4061	0.9772	0.7507	0.2266	0.0027	-0.0021	-0.001	0.0013	0.0007	0.001	0.0019	-0.0017	30.5	34.5
	5B	46	AX-95094658	AX-110673101	9.9824	8.6128	1.3696	1.9624	1.8189	0.1435	0.0042	-0.0016	0.0005	-0.001	0.0011	0.0006	-0.0013	0.0017	45.5	46.5	QGr.cib-5B.1
	5B	59	AX-110070373	AX-110433907	8.9209	8.421	0.4999	2.0863	1.7789	0.3075	0.0041	0.0026	0.0005	-0.0002	0.0018	-0.0006	-0.0014	-0.0027	58.5	59.5	QGr.cib-5B.2
	6B	61	AX-95659648	AX-94420407	7.077	4.995	2.082	1.7591	1.0635	0.6955	-0.0032	0.0001	0.0021	0.0022	-0.0057	0.0021	-0.0006	-0.0002	60.5	62.5	QGr.cib-6B.1
	6B	68	AX-95653739	AX-108960315	3.8508	2.464	1.3868	0.7177	0.5253	0.1924	-0.0022	-0.0013	0.0013	-0.0001	0.002	0.0009	-0.0021	-0.0007	67.5	68.5	QGr.cib-6B.2
	7B	81	AX-112288637	AX-110944611	3.6538	2.3695	1.2843	0.7022	0.5028	0.1994	0.0022	-0.0005	-0.001	0.0021	0.0001	0.0018	-0.002	-0.0006	79.5	82.5
	7B	103	AX-108758480	AX-109522327	3.8777	2.7305	1.1472	0.7382	0.5795	0.1587	0.0023	0.0014	-0.0012	-0.0004	-0.0021	0.0013	0	0.0009	100.5	104.5
	2D	8	AX-94779177	AX-110671664	5.2847	4.2755	1.0092	1.0587	0.8999	0.1589	0.0029	0.0016	-0.0009	-0.001	-0.0018	0.0011	0.0013	-0.0002	4.5	9.5
	2D	18	AX-111134429	AX-95008796	10.5978	9.7576	0.8402	2.2514	1.9159	0.3354	0.0043	0.0008	-0.002	-0.0018	0.0036	-0.0002	0.0006	-0.001	17.5	18.5	QGr.cib-2D.1
	2D	21	AX-108762451	AX-110340304	8.696	7.394	1.302	1.9441	1.5766	0.3675	0.0039	-0.0008	0.0042	-0.0016	-0.001	0.0005	0	-0.0013	20.5	21.5	QGr.cib-2D.2
	2D	87	AX-108773700	AX-94638915	4.7341	4.3972	0.3369	0.9902	0.9144	0.0758	-0.0029	0.0004	-0.0017	0.0011	-0.0002	0.0002	-0.0004	0.0006	86.5	93.5
	2D	116	AX-94646857	AX-111656957	2.7714	1.708	1.0634	0.6444	0.357	0.2875	0.0018	0.0019	-0.0016	0	0.0023	0.0006	-0.0027	-0.0005	110.5	116
	3D	6	AX-111489545	AX-109829856	2.559	2.0175	0.5415	0.5575	0.4302	0.1272	0.002	0.0017	0.0004	0.0002	-0.0001	0.0005	-0.0022	-0.0004	4.5	8.5
	3D	43	AX-111045512	AX-109868592	3.2579	2.6113	0.6466	0.6771	0.5419	0.1352	0.0022	0.0017	0.0013	-0.0002	0.0002	-0.0017	-0.0012	-0.0001	41.5	44.5
	4D	0	AX-89398511	AX-110977051	16.5541	12.0669	4.4872	3.5996	2.5915	1.0081	0.0051	0.0009	0.0061	-0.0043	-0.0025	-0.002	0	0.0017	0	0.5
	4D	18	AX-111142287	AX-110402339	3.7585	3.2126	0.5459	0.7998	0.664	0.1358	0.0025	0.0015	0.0003	-0.0016	-0.0007	0.0015	0	-0.0011	16.5	19.5
	5D	6	AX-110412912	AX-111464164	4.0414	2.6097	1.4316	0.8407	0.5504	0.2903	-0.0023	0.0016	-0.0029	-0.0002	0.0002	-0.0014	0.0024	0.0002	2.5	8.5
	5D	39	AX-109500485	AX-86185855	6.3594	5.4457	0.9137	1.259	1.1393	0.1197	-0.0033	0.0005	-0.0002	0.0001	0.0002	-0.0022	0.0016	-0.0001	37.5	39.5
	5D	107	AX-111019979	AX-110409786	3.7794	2.1373	1.6421	0.8304	0.452	0.3784	0.0021	0.0023	0.0008	-0.0005	0.0001	0.0019	-0.0039	-0.0007	104.5	107
	6D2	2	AX-110048049	AX-110119503	4.1771	3.7749	0.4022	0.894	0.7973	0.0967	-0.0027	-0.0014	-0.0005	-0.0007	-0.0002	0.0001	0.0016	0.001	1.5	7.5
	7D	67	AX-110659621	AX-110826147	3.9244	0.5104	3.4141	0.748	0.1088	0.6392	0.001	-0.0032	-0.0012	0.0024	-0.0007	0.0045	-0.0018	0	65.5	70.5
	7D	130	AX-109113600	AX-108777441	3.1552	2.1321	1.0231	0.6125	0.4496	0.1629	-0.0021	-0.0009	0.0009	0.0024	0.0004	-0.0004	-0.0017	-0.0007	128.5	131
LWR	1A	1	AX-112289915	AX-111015470	6.5378	5.7344	0.8034	1.4209	1.3954	0.0255	-0.015	-0.0004	0.004	-0.001	0.0015	-0.0026	0	-0.0015	0	4.5
	1A	17	AX-110442306	AX-108893454	5.2305	4.3047	0.9258	1.1376	1.0573	0.0803	-0.0129	-0.003	0.007	-0.0052	-0.0003	0.0003	0.0015	-0.0002	16.5	17.5
	1A	20	AX-110967932	AX-95198220	5.9231	5.076	0.847	1.331	1.2631	0.068	-0.0141	-0.0037	0.005	-0.0048	-0.0014	0.0022	0.0024	0.0003	19.5	20.5
	1A	24	AX-95237226	AX-108764693	5.3492	4.537	0.8122	1.2015	1.1356	0.0658	-0.0134	-0.0027	0.0061	-0.0042	-0.0021	0.0026	0.0001	0.0002	23.5	24.5
	1A	26	AX-108820130	AX-111632641	3.9092	3.2508	0.6584	0.8704	0.8139	0.0565	-0.0113	-0.0017	0.0052	-0.0052	-0.0012	0.0019	0.0002	0.0009	25.5	26.5
	2A	10	AX-110917900	AX-110498447	34.7714	31.3918	3.3795	9.1661	8.0053	1.1607	-0.0355	0.0044	-0.0147	0.0204	-0.0206	0.0123	0.004	-0.0058	8.5	11.5	QLwr.cib-2A
	2A	60	AX-109873869	AX-94642596	4.3878	3.6276	0.7602	1.1356	0.9047	0.2309	0.0122	-0.0057	0.0086	-0.0114	0.0035	0.0024	0.0033	-0.0007	57.5	60.5
	2A	67	AX-111550859	AX-110458328	2.9859	1.6043	1.3816	0.744	0.4002	0.3438	0.008	0.0006	0.0113	-0.0143	0.0008	-0.0042	0.0055	0.0004	66.5	68.5
	3A	3	AX-110078548	AX-110522310	3.4847	2.2075	1.2772	0.8323	0.5486	0.2836	-0.0095	-0.0054	0.0037	-0.0005	0.01	-0.0126	0.0049	-0.0002	1.5	6.5
	3A	22	AX-109366295	AX-111541125	3.203	2.933	0.27	0.7849	0.7138	0.071	-0.0107	0.0012	-0.0008	0.0017	-0.0025	-0.0062	0.0053	0.0013	14.5	33.5
	4A	30	AX-94400142	AX-94407690	13.2088	9.8171	3.3917	3.0476	2.5017	0.5459	0.0198	0	-0.0009	0.0059	0.007	-0.0216	0.006	0.0036	29.5	30.5	QLwr.cib-4A
	4A	36	AX-108909164	AX-110471504	4.6259	2.3511	2.2748	1.368	0.5869	0.7811	0.0096	0.0095	0.013	-0.0091	0.0149	-0.0075	-0.0138	-0.007	33.5	37.5
	4A	54	AX-111692316	AX-89408533	2.7874	0.8055	1.9819	0.6409	0.1792	0.4617	0.0053	0.0099	0.0137	-0.0104	0.0034	-0.0052	-0.0082	-0.0031	52.5	55.5
	5A1	0	AX-111158819	AX-108839873	20.8252	19.4771	1.3481	5.6864	5.0092	0.6771	0.0281	-0.0021	0.0215	-0.0096	0.0057	-0.0112	-0.0055	0.0011	0	0.5	QLwr.cib-5A1
	5A1	66	AX-109620371	AX-110418098	3.438	2.6928	0.7451	0.7032	0.6112	0.092	-0.0098	-0.0039	0.0075	-0.0005	-0.0007	0.0005	-0.005	0.002	62.5	67.5
	5A1	96	AX-110995304	AX-95631051	3.7378	1.3794	2.3584	0.7434	0.343	0.4004	-0.0074	-0.0045	0.0094	-0.0075	0.0042	0.012	-0.0104	-0.003	93.5	99.5
	6A	48	AX-110609622	AX-109952070	2.8228	2.2077	0.6151	0.6874	0.5535	0.1339	0.0096	0.0006	0.0055	-0.0006	-0.01	0.0021	0.004	-0.0016	41.5	50.5
	7A	7	AX-111537329	AX-94761033	2.731	1.1348	1.5962	0.6786	0.2833	0.3952	-0.0068	-0.0036	0.012	0.0064	-0.0145	0.0045	-0.0004	-0.0045	4.5	11.5
	7A	19	AX-86178106	AX-109950970	6.8021	6.2633	0.5388	1.7435	1.5539	0.1896	-0.0158	-0.0019	-0.003	0.0069	-0.0107	0.0027	0.0055	0.0005	18.5	20.5
	7A	32	AX-111558895	AX-112290195	3.8767	3.5016	0.3751	1.0099	0.875	0.1349	-0.0119	0.0047	-0.0035	0.0073	-0.0072	-0.0032	0.0013	0.0006	31.5	32.5
	1B	0	AX-94642563	AX-95078610	3.5856	1.9891	1.5965	0.9253	0.4986	0.4267	0.009	0.0089	0.0052	-0.0104	-0.0136	0.0077	0.0046	-0.0023	0	1.5
	1B	77	AX-110918755	AX-109372293	3.4292	0.2531	3.1761	0.6946	0.0802	0.6144	0.0036	0.0118	0.0084	-0.0168	0.0056	-0.0122	-0.0004	0.0036	75.5	82.5
	2B	61	AX-86179354	AX-86164309	5.5972	4.537	1.0602	1.311	1.0905	0.2205	-0.0131	-0.0025	-0.0005	0.0102	-0.0104	0.0043	0.0006	-0.0016	53.5	64.5	QLwr.cib-2B
	3B	102	AX-109998884	AX-110397603	3.5005	2.9384	0.5622	0.9019	0.7261	0.1758	0.0108	0.0059	0	-0.007	-0.001	0.0093	-0.0032	-0.004	101.5	103.5
	5B	4	AX-109859693	AX-110714323	3.0338	2.3363	0.6976	0.6951	0.5874	0.1077	-0.0098	-0.0051	-0.0015	-0.0059	0.0023	0.005	0.0054	-0.0002	2.5	4.5
	5B	33	AX-111053956	AX-108884605	3.8888	1.8893	1.9994	0.8828	0.4729	0.4099	-0.0088	0.0144	0.0026	-0.0061	-0.0016	-0.0088	-0.0085	0.0079	29.5	34.5
	5B	41	AX-94389734	AX-110591001	7.0518	4.6981	2.3537	1.6562	1.1645	0.4917	-0.0135	0.0177	-0.0096	0.0048	-0.0013	-0.0043	0.002	-0.0093	40.5	41.5	QLwr.cib-5B.1
	5B	47	AX-94464288	AX-110509091	6.6184	5.1684	1.45	1.8691	1.3014	0.5678	-0.0147	-0.0176	-0.0063	0.0033	0.0009	-0.0035	0.0092	0.0141	46.5	47.5	QLwr.cib-5B.2
	5B	60	AX-109035084	AX-109930752	5.4632	5.2575	0.2057	1.4564	1.3054	0.151	-0.0143	0.0021	-0.0067	-0.0011	-0.0063	-0.0001	0.0053	0.0069	58.5	60.5
	6B	61	AX-95659648	AX-94420407	4.9278	2.6514	2.2764	1.4078	0.6687	0.7391	0.0103	-0.0013	-0.0077	-0.0102	0.0247	-0.0067	0.0006	0.0005	60.5	62.5	QLwr.cib-6B
	2D	8	AX-94779177	AX-110671664	3.3745	2.56	0.8145	0.7921	0.6421	0.15	-0.01	-0.0009	0.0007	0.0041	0.0075	-0.008	-0.0048	0.0014	1.5	9.5
	2D	18	AX-111134429	AX-95008796	8.4809	7.444	1.0369	1.9955	1.7116	0.2839	-0.0165	0.0026	0.0041	0.0075	-0.015	-0.0001	-0.0019	0.0026	17.5	18.5	QLwr.cib-2D.1
	2D	21	AX-108762451	AX-110340304	6.531	5.331	1.2	1.9915	1.3511	0.6403	-0.0147	0.0059	-0.0242	0.0077	0.0044	0.0012	0.0028	0.0023	20.5	21.5	QLwr.cib-2D.2
	2D	88	AX-108773700	AX-94638915	5.2782	4.9563	0.322	1.305	1.2216	0.0833	0.0138	-0.0019	0.0073	-0.0049	-0.0002	-0.0011	0.0026	-0.0017	86.5	93.5
	3D	6	AX-111489545	AX-109829856	3.0312	2.575	0.4562	0.7518	0.6496	0.1022	-0.0101	-0.0069	-0.0019	0.0002	-0.0001	0.0011	0.0077	-0.0002	4.5	8.5
	3D	43	AX-111045512	AX-109868592	2.9627	2.1079	0.8548	0.744	0.5136	0.2304	-0.009	-0.0051	-0.0099	0.0016	-0.0017	0.0084	0.0073	-0.0007	41.5	44.5
	4D	0	AX-89398511	AX-110977051	19.8979	15.6559	4.2421	5.8121	4.0449	1.7672	-0.0259	-0.0079	-0.0349	0.0226	0.0123	0.0079	0.0051	-0.0052	0	0.5
	4D	18	AX-111142287	AX-110402339	3.1781	2.4887	0.6894	0.7777	0.5824	0.1953	-0.0096	0.0022	-0.0035	0.0068	0.0026	-0.0116	-0.0003	0.0037	13.5	19.5
	5D	6	AX-110412912	AX-111464164	3.102	2.0574	1.0446	0.8784	0.5151	0.3633	0.009	-0.0039	0.0152	0.0004	-0.0046	0.0042	-0.0107	-0.0006	2.5	8.5
	5D	39	AX-109500485	AX-86185855	5.0074	4.2777	0.7297	1.1945	1.0648	0.1297	0.0129	-0.0006	0.0014	0	-0.0041	0.0089	-0.0066	0.001	37.5	39.5
	5D	89	AX-109847938	AX-109485887	2.938	1.9483	0.9897	0.7607	0.4889	0.2717	-0.009	-0.0107	-0.0051	0.0029	-0.002	0.0035	0.0122	-0.0007	85.5	91.5
	5D	107	AX-111019979	AX-110409786	4.5219	2.9725	1.5494	1.1657	0.7441	0.4216	-0.011	-0.0107	-0.0033	0.0039	0.0012	-0.0089	0.016	0.0017	105.5	107
	6D1	28	AX-110564593	AX-110040257	2.5176	1.6267	0.8909	0.6503	0.4093	0.241	0.008	0.0071	0.0068	0.0005	0.0021	-0.0095	-0.0084	0.0014	25.5	29.5
	6D2	2	AX-110048049	AX-110119503	3.657	3.3438	0.3132	0.9143	0.838	0.0763	0.0115	0.0051	0.0027	0.002	-0.0019	0.0009	-0.0057	-0.003	1.5	7.5
	7D	67	AX-110659621	AX-110826147	5.5248	2.3202	3.2047	1.2945	0.5864	0.7081	-0.0096	0.0117	0.008	-0.0088	0.0032	-0.0202	0.0086	-0.0026	65.5	71.5	QLwr.cib-7D
	7D	130	AX-109113600	AX-108777441	3.0197	1.9617	1.058	0.6962	0.4919	0.2043	0.0089	0.0041	-0.0036	-0.0111	-0.0024	0.0067	0.005	0.0013	127.5	131
LOD, LOD score for all effects; LOD (A), LOD score for additive and dominance effects; LOD (A by E), LOD score for additive and dominance by environment effects; PVE, phenotypic variation explained by all effects at the current scanning position; PVE (A), phenotypic variation explained by additive and dominance effect at the current scanning position; PVE (A by E), phenotypic variation explained …

## Sheet: Table S6
Table S6 Genotype analysis of sixteen functional markers related to yield traits used in this study.
Genes	Function markers	Chromosome	Traits	Corresponding traits of ZKM138	References
TaSus2-2A	Sus2-2A-20SNP	2A	Thousand grain weight	Low TGW	Jiang et al. (2011)
TaCwi	TaCwi	2A	Thousand grain weight	Normal TGW	Ma et al. (2012), Jiang et al. (2015)
TaGS	TaGS2A1_239IND2	2A	Thousand grain weight	Low TGW	Zhang et al. (2014)
TaGS2-B1	TaGS2B1_1936	2B	Biomass per plant, Grain number of plant, number of spike, Thousand grain weight	Low TGW	Li et al. (2011)
TaSus2	TaSus2-2B_SNP	2B	Thousand grain weight	Low TGW	Jiang et al. (2011)
GS5	GS5-2334-SNP	3A	Thousand grain weight	Low TGW	Li et al. (2011)
TaTGW6	TGW6-1050-AL1	3A	Thousand grain weight	High TGW	Hanif et al. (2016)
TaCWI	CWI-5D-312	5D	Thousand grain weight	Low TGW	Ma et al. (2012), Jiang et al. (2015)
TaGW2	GW2-6B-1709SNP	6B	Thousand grain weight	Low TGW	Zhang et al. (2018)
	GW2-6B-721SNP	6B	Thousand grain weight	Low TGW	Zhang et al. (2018)
	GW2-6B-83SNP	6B	Thousand grain weight	Low TGW	Zhang et al. (2018)
TaSus1-7A	Sus1-7A-1185SNP	7A	Thousand grain weight	High TGW	Hou et al. (2014)
TaTGW-7A	TGW7_986_SNP	7A	Thousand grain weight	High TGW	Hu et al. (2016)
TaMOS1-7A	TaMoc-2433	7A	Grain number of spike	Low TGW	Zhang et al. (2015)
TaSus1-7B	Sus1-7B-2932IND	7B	Thousand grain weight	Low TGW	Hou et al. (2014)
TaGS-D1	TaGS-D1	7D	Thousand grain weight	Low TGW	Zhang et al. (2014)

## Sheet: Table S7
Table S7 Saturated genetic map of the target QTL.
Markers	Genetic map (cM)
AX-94506461	0
AX-86168860	4.205
AX-94800842	5.034
AX-94653398	5.577
AX-94966145	6.007
AX-110067102	9.347
AX-109856730	15.784
SSR1	22.662
AX-179476814	24.622
AX-110009072	25.554
AX-110528741	25.984
SSR2	27.055
SSR3	27.652
KASP_AX-109308935	30.081
AX-94601335	33.696
AX-111806104	34.361
KASP6A-3535	35.774
KASP6A-1	37.101
KASP6A-2	37.703
KASP6A-3	37.962
KASP6A-4	38.08
KASP6A-5	38.186
KASP6A-6	38.206
KASP6A-7	38.249
KASP6A-8	38.278
KASP6A-9	38.339
KASP6A-10	38.425
KASP6A-11	38.435
KASP6A-12	38.435
KASP6A-13	38.435
KASP6A-14	38.454
KASP6A-15	38.456
KASP6A-16	38.459
KASP6A-17	38.461
KASP6A-18	38.477
KASP6A-19	38.483
KASP6A-20	38.483
KASP6A-21	38.492
KASP6A-22	38.497
KASP6A-23	38.51
KASP6A-24	38.541
KASP6A-25	38.586
KASP6A-26	38.628
KASP6A-27	38.664
KASP6A-28	38.745
KASP6A-29	38.844
KASP6A-30	38.91
KASP6A-31	39.04
KASP6A-32	39.041
KASP6A-33	39.219
KASP6A-34	39.263
KASP6A-35	39.33
KASP6A-36	39.714
KASP6A-37	40.121
KASP6A-2121	40.747
AX-179558821	43.658
AX-108826255	43.998
AX-109838705	44.524
AX-111232648	44.724
AX-111476658	45.169
AX-109844821	45.71
SSR4	47.817
SSR5	52.714
AX-110609622	53.65
AX-109952070	56.261
SSR6	56.94
AX-179475713	57.865
AX-95661524	58.81
WMC179	61.421

## Sheet: Table S8
Table S8 Genotypes for QTgw.cib-6A using the KASP marker KASP6A-2121 in 624 wheat varieties worldwide.
Varieties	Countries	Wheat Zones	Genotype
Xiaoyan315	China	Ⅰ	BB
Pubing151	China	Ⅰ	BB
Pubing04-1	China	Ⅰ	BB
Pubing04-2	China	Ⅰ	BB
Pubing3504	China	Ⅰ	BB
Yunhan102	China	Ⅰ	BB
Pubing2011	China	Ⅰ	BB
Zhongyou206	China	Ⅰ	BB
Zaoyangmai	China	Ⅰ	BB
Xiaoyan22	China	Ⅰ	BB
Xinong364	China	Ⅱ	BB
Zhongyu1428	China	Ⅱ	BB
Xinong360	China	Ⅱ	BB
Zheng9023	China	Ⅱ	BB
Zheng7698	China	Ⅱ	BB
Guojiamai15	China	Ⅱ	BB
Jimai22	China	Ⅱ	BB
Xinong979	China	Ⅱ	BB
Xinong589	China	Ⅱ	AA
Zhoumai40	China	Ⅱ	BB
Hemai1301	China	Ⅱ	AA
Jindi166	China	Ⅱ	BB
Xinong622	China	Ⅱ	BB
Xianmai99	China	Ⅱ	BB
Zhongyu9331	China	Ⅱ	AA
Zhumai328	China	Ⅱ	BB
Hua2132	China	Ⅱ	BB
Hua2667	China	Ⅱ	BB
Xinong189	China	Ⅱ	BB
Zimai12	China	Ⅱ	BB
Bainong207	China	Ⅱ	BB
Ronghua188	China	Ⅱ	BB
Xinong285	China	Ⅱ	BB
Huamai0981	China	Ⅱ	BB
Hua1315	China	Ⅱ	BB
Tainong2987	China	Ⅱ	BB
Xinong733	China	Ⅱ	BB
Fannong6	China	Ⅱ	BB
Xinnong23	China	Ⅱ	BB
Zhengmai103	China	Ⅱ	BB
Zhengmai004	China	Ⅱ	BB
Jimai52	China	Ⅱ	BB
Yannong1212	China	Ⅱ	BB
Xianmai10	China	Ⅱ	BB
Hua2820	China	Ⅱ	BB
Nongda5738	China	Ⅱ	BB
Nongda5758	China	Ⅱ	BB
Xinmai29	China	Ⅱ	BB
Zhoumai22	China	Ⅱ	BB
Deyan0516	China	Ⅱ	BB
Hefeng3	China	Ⅱ	BB
Chuangmai58	China	Ⅱ	BB
Zhengpinmai25	China	Ⅱ	BB
Saidemai601	China	Ⅱ	BB
Tianmin366	China	Ⅱ	BB
Xuyan5	China	Ⅱ	BB
Zhengmai16	China	Ⅱ	BB
Jimai44	China	Ⅱ	BB
Jimai55	China	Ⅱ	BB
Saidemai17	China	Ⅱ	BB
Pumai1165	China	Ⅱ	BB
Xinong592	China	Ⅱ	BB
Zheng9405	China	Ⅱ	BB
Xinong916	China	Ⅱ	BB
Xinong235	China	Ⅱ	BB
Keda109	China	Ⅱ	BB
Xinong113	China	Ⅱ	BB
Xinong66	China	Ⅱ	BB
Zhongmai698	China	Ⅱ	BB
Xinong162	China	Ⅱ	BB
Zhengmai162	China	Ⅱ	BB
Xinong511	China	Ⅱ	BB
Luomai33	China	Ⅱ	AA
Zhoumai32	China	Ⅱ	BB
Fengdecunmai5	China	Ⅱ	BB
Zhoumai30	China	Ⅱ	AA
Yuanfeng175	China	Ⅱ	AA
Zhoumai28	China	Ⅱ	BB
Zhoumai24	China	Ⅱ	BB
Zhoumai26	China	Ⅱ	BB
Yumai34	China	Ⅱ	BB
Zhongyuanguoke9	China	Ⅱ	BB
Landemai9	China	Ⅱ	BB
Lin1900	China	Ⅱ	BB
Jinghua101	China	Ⅱ	BB
Jinghua102	China	Ⅱ	BB
Jimai5086	China	Ⅱ	BB
Jimai6001	China	Ⅱ	BB
Denghai216	China	Ⅱ	BB
Xinshiji156	China	Ⅱ	BB
Shannong43057	China	Ⅱ	BB
Shannong534421	China	Ⅱ	BB
Yannong199	China	Ⅱ	BB
Yangmai81	China	Ⅱ	BB
Hen1603	China	Ⅱ	BB
Henmai164421	China	Ⅱ	BB
Shi1750903	China	Ⅱ	BB
Linmai12	China	Ⅱ	BB
Hemai316	China	Ⅱ	BB
LS1471	China	Ⅱ	BB
Guanmai96	China	Ⅱ	BB
Henmai175087	China	Ⅱ	BB
ShannongO4447	China	Ⅱ	BB
Liangxing87	China	Ⅱ	BB
Jimai18273	China	Ⅱ	BB
Yannong31	China	Ⅱ	BB
Jinong17287	China	Ⅱ	BB
ShannongK33491	China	Ⅱ	BB
Shannong711006	China	Ⅱ	BB
LS2559	China	Ⅱ	BB
YF6092	China	Ⅱ	BB
Jimai5858	China	Ⅱ	BB
ShannongQH001	China	Ⅱ	BB
Huaimai1716	China	Ⅱ	BB
Lin801	China	Ⅱ	BB
JK64109	China	Ⅱ	BB
Taikemai48	China	Ⅱ	BB
HenmaiT175053	China	Ⅱ	BB
LS1888	China	Ⅱ	BB
Puxing21	China	Ⅱ	BB
Shengmai186	China	Ⅱ	BB
Shi17T5248	China	Ⅱ	BB
Taikemai41	China	Ⅱ	BB
Shijimai138	China	Ⅱ	BB
17CA42	China	Ⅱ	BB
XR4405-7	China	Ⅱ	BB
LS33043	China	Ⅱ	BB
V1912	China	Ⅱ	BB
JM805	China	Ⅱ	BB
GY13029	China	Ⅱ	BB
Hemai177	China	Ⅱ	BB
Hanke4898	China	Ⅱ	BB
Puxing31	China	Ⅱ	BB
Puxing25	China	Ⅱ	BB
Shengmai209	China	Ⅱ	BB
Hemai301	China	Ⅱ	BB
Hemai203	China	Ⅱ	BB
Han174291	China	Ⅱ	BB
LS91959	China	Ⅱ	BB
LS93846	China	Ⅱ	BB
Jimai347	China	Ⅱ	BB
TKM1065	China	Ⅱ	BB
Denghai228	China	Ⅱ	BB
Jinhe20490	China	Ⅱ	BB
SN1237	China	Ⅱ	BB
Xingmai40	China	Ⅱ	BB
Shengmai196	China	Ⅱ	BB
ShannongN2695	China	Ⅱ	BB
Xingmai47	China	Ⅱ	BB
HenmaiH184039	China	Ⅱ	BB
Henyu1	China	Ⅱ	AA
HenmaiT1932092	China	Ⅱ	BB
Jinghua301	China	Ⅱ	BB
Nongxin216	China	Ⅱ	BB
Yannong618	China	Ⅱ	BB
Yannong191	China	Ⅱ	BB
Zhongke20366	China	Ⅱ	BB
Lin211	China	Ⅱ	BB
Lin2001	China	Ⅱ	BB
Qingxin1307	China	Ⅱ	BB
LS2131	China	Ⅱ	BB
LS95704	China	Ⅱ	BB
Xinmai19	China	Ⅱ	BB
Xinmai11	China	Ⅱ	BB
Guanmai99	China	Ⅱ	BB
Henmai2193437	China	Ⅱ	BB
Shi184211	China	Ⅱ	BB
Jinongmai17103	China	Ⅱ	BB
HenmaiY194194	China	Ⅱ	BB
HenmaiT204041	China	Ⅱ	BB
Guoke10	China	Ⅱ	BB
Shannong831860	China	Ⅱ	BB
BC18PT236	China	Ⅱ	BB
BC18PT124	China	Ⅱ	BB
19CA29	China	Ⅱ	BB
TKM714	China	Ⅱ	BB
TKM0407	China	Ⅱ	BB
Shi6158	China	Ⅱ	BB
ShannongK39783	China	Ⅱ	BB
ShannongK21565	China	Ⅱ	BB
Shannong850918	China	Ⅱ	BB
GY18204	China	Ⅱ	BB
LS92102	China	Ⅱ	BB
Yannong857	China	Ⅱ	BB
Zhongyu266	China	Ⅱ	BB
Jinhe20350	China	Ⅱ	BB
LS3904	China	Ⅱ	BB
Xinshiji7	China	Ⅱ	BB
Xinshiji8	China	Ⅱ	BB
Zhongke19021	China	Ⅱ	BB
RZ113	China	Ⅱ	BB
RZ3479	China	Ⅱ	BB
RZ1901	China	Ⅱ	BB
Jimai365	China	Ⅱ	BB
Jimai348	China	Ⅱ	BB
Jimai346	China	Ⅱ	BB
TKM0329	China	Ⅱ	BB
SN1831	China	Ⅱ	BB
SN749	China	Ⅱ	BB
20CA65	China	Ⅱ	BB
JK830202	China	Ⅱ	BB
JK64332-2	China	Ⅱ	BB
Jimai5066	China	Ⅱ	BB
Jimai1810	China	Ⅱ	BB
Jimai691	China	Ⅱ	BB
Jimai6266	China	Ⅱ	BB
Jimai5088	China	Ⅱ	BB
Jimai894	China	Ⅱ	BB
Cunmai22	China	Ⅱ	BB
Boxin271	China	Ⅱ	BB
Beida815	China	Ⅱ	BB
Hen2107	China	Ⅱ	BB
Huaguang9	China	Ⅱ	BB
Shi198056	China	Ⅱ	BB
Cunmai116	China	Ⅱ	BB
Boxin271	China	Ⅱ	BB
Beida815	China	Ⅱ	BB
Jimai5029	China	Ⅱ	BB
Jimai5234	China	Ⅱ	BB
JimaiU61	China	Ⅱ	BB
Nongda558	China	Ⅱ	BB
Nongda8136	China	Ⅱ	BB
Liangxing86	China	Ⅱ	BB
Xinong161	China	Ⅱ	BB
Keda116	China	Ⅱ	BB
Huacheng916	China	Ⅱ	BB
Xinong1155	China	Ⅱ	BB
XinKemai176	China	Ⅱ	BB
Annong1928	China	Ⅱ	BB
Xinong586	China	Ⅱ	BB
Zhengmai1926	China	Ⅱ	BB
Lunxuan125	China	Ⅱ	BB
Womai44	China	Ⅱ	AA
Lunxuan136	China	Ⅱ	BB
Fanyumai32	China	Ⅱ	BB
Xinong926	China	Ⅱ	BB
Luomai109	China	Ⅱ	BB
Xinong633	China	Ⅱ	BB
Yunong907	China	Ⅱ	BB
Luomai7011	China	Ⅱ	BB
Zhengyanmai182	China	Ⅱ	BB
Zhiyuan171	China	Ⅱ	BB
Hanfeng3468	China	Ⅱ	BB
Dehongfu199	China	Ⅱ	BB
Xinshiji2	China	Ⅱ	BB
Liangke6	China	Ⅱ	BB
Zhongyan270	China	Ⅱ	BB
Tianmin360	China	Ⅱ	BB
Zhengda181	China	Ⅱ	BB
Jimai337	China	Ⅱ	BB
Xinong579	China	Ⅱ	BB
Baofeng1903	China	Ⅱ	BB
Yanhao369	China	Ⅱ	BB
Zhumai599	China	Ⅱ	AA
Zhumai569	China	Ⅱ	BB
Xinmai72	China	Ⅱ	BB
Xinmai78	China	Ⅱ	BB
Xinfeng79	China	Ⅱ	BB
Taihemai10	China	Ⅱ	BB
Ruihuamai513	China	Ⅱ	AA
Ruihuamai236	China	Ⅱ	BB
Liangke58	China	Ⅱ	BB
Liangke9	China	Ⅱ	BB
Xinong827	China	Ⅱ	BB
Cunmai38	China	Ⅱ	BB
Yangmai2	China	Ⅲ	BB
Yangmai1	China	Ⅲ	BB
Yunmai53	China	Ⅲ	BB
Yangfumai2	China	Ⅲ	BB
Yunmai57	China	Ⅲ	BB
Zhongmai166	China	Ⅲ	BB
Yangmai22	China	Ⅲ	BB
Chuannong29	China	Ⅳ	BB
Chuannong32	China	Ⅳ	BB
Chuanfu8	China	Ⅳ	BB
Chuanlanmai1	China	Ⅳ	BB
Chuanmai104	China	Ⅳ	BB
Chuanmai107	China	Ⅳ	BB
Chuanmai42	China	Ⅳ	AA
Chuanmai43	China	Ⅳ	AA
Chuanmai64	China	Ⅳ	BB
Chuanmai82	China	Ⅳ	BB
Mianyang24	China	Ⅳ	BB
Mianyang30	China	Ⅳ	BB
Shumai830	China	Ⅳ	BB
Shumai114	China	Ⅳ	BB
Shumai133	China	Ⅳ	BB
Kechengmai1	China	Ⅳ	BB
Lantian22	China	Ⅳ	BB
Lantian26	China	Ⅳ	BB
Lantian34	China	Ⅳ	BB
Chuannong12	China	Ⅳ	BB
Chuannong19	China	Ⅳ	BB
Chuannong21	China	Ⅳ	BB
Chuannong27	China	Ⅳ	BB
Chuanyu20	China	Ⅳ	BB
Chuanyu23	China	Ⅳ	BB
Chuanyu29	China	Ⅳ	BB
Fan6	China	Ⅳ	BB
Mianmai1403	China	Ⅳ	BB
Xikemai4	China	Ⅳ	BB
Shumai969	China	Ⅳ	BB
CD0151568-9	China	Ⅳ	BB
CD015-J067	China	Ⅳ	BB
CY21	China	Ⅳ	BB
Shumai1609	China	Ⅳ	BB
Shumai1628	China	Ⅳ	BB
CD151605-2	China	Ⅳ	BB
Chuanmai98	China	Ⅳ	BB
Chuanmai901	China	Ⅳ	BB
Chuanmai1639	China	Ⅳ	BB
CD015-1237-2	China	Ⅳ	BB
CD015-1264-1	China	Ⅳ	BB
Kemai2939	China	Ⅳ	BB
Chuanmai36	China	Ⅳ	BB
Shumai3	China	Ⅳ	BB
Yumai1	China	Ⅳ	BB
Shumai1661	China	Ⅳ	BB
Chuanyu26	China	Ⅳ	BB
Shumai580	China	Ⅳ	BB
Kechengmai4	China	Ⅳ	BB
Zhongmai578	China	Ⅳ	BB
Chuannong16	China	Ⅳ	BB
Mianmai51	China	Ⅳ	AA
CS	China	Ⅳ	BB
Chuannong33	China	Ⅳ	BB
Zimai1	China	Ⅳ	BB
Zimai2	China	Ⅳ	BB
Lantian34	China	Ⅳ	BB
Lantian35	China	Ⅳ	BB
Lantian19	China	Ⅳ	BB
Zhongkemai169	China	Ⅳ	AA
Zhongkemai10	China	Ⅳ	BB
Shumai691	China	Ⅳ	BB
Mianmai807	China	Ⅳ	BB
Mianzimai830	China	Ⅳ	BB
Mianyangnong	China	Ⅳ	BB
Chuanyu38	China	Ⅳ	BB
Xikemai518	China	Ⅳ	BB
Chengshixinmai3	China	Ⅳ	AA
Mianmai45	China	Ⅳ	BB
Mianyang11	China	Ⅳ	BB
Guinong19-4	China	Ⅳ	BB
Guinong7	China	Ⅳ	BB
Chuanyu16	China	Ⅳ	BB
Chuanyu12	China	Ⅳ	BB
Mianmai37	China	Ⅳ	BB
81-24	China	Ⅳ	BB
Chuanmai30	China	Ⅳ	BB
Chuanmai28	China	Ⅳ	BB
W17	China	Ⅳ	BB
CD1437	China	Ⅳ	BB
R210	China	Ⅳ	BB
99-1572	China	Ⅳ	AA
64002	China	Ⅳ	BB
YR5	China	Ⅳ	BB
Yu98767	China	Ⅳ	BB
Yingli7268	China	Ⅳ	BB
Kechengmai2	China	Ⅳ	AA
Chongzu104	China	Ⅳ	BB
Zhongkemai17	China	Ⅳ	AA
Zhongkemai18	China	Ⅳ	AA
Zhongkemai36	China	Ⅳ	AA
Chuanyu12	China	Ⅳ	BB
Chuanmai30	China	Ⅳ	BB
CD1437	China	Ⅳ	BB
Shumai1958	China	Ⅳ	BB
Zhongke1816	China	Ⅳ	AA
Shengdemai1343	China	Ⅳ	BB
Xikemai510	China	Ⅳ	BB
Chuanmai913	China	Ⅳ	BB
Kenong17	China	Ⅳ	BB
Chuanmai620	China	Ⅳ	BB
Chuanyu49	China	Ⅳ	BB
Chuanfu23	China	Ⅳ	BB
Chuanmai1759	China	Ⅳ	BB
Wei1291	China	Ⅳ	BB
Shumai1963	China	Ⅳ	BB
Chuanyu42	China	Ⅳ	BB
Chuanmai615	China	Ⅳ	BB
Xikemai5518	China	Ⅳ	BB
Shumai2050	China	Ⅳ	BB
Zhongkemai163	China	Ⅳ	AA
Chuanmai1936	China	Ⅳ	BB
Mianmai837	China	Ⅳ	BB
Shumai2051	China	Ⅳ	BB
Chuannong49	China	Ⅳ	BB
Chuannong804	China	Ⅳ	BB
Shumai1925	China	Ⅳ	BB
Yumai7	China	Ⅳ	BB
Chuanmai618	China	Ⅳ	AA
Kecheng15	China	Ⅳ	BB
Chuanmai914	China	Ⅳ	BB
Xike568	China	Ⅳ	BB
Nanmai979	China	Ⅳ	AA
Chuannong50	China	Ⅳ	BB
Chuannong45	China	Ⅳ	BB
Chuanmai1802	China	Ⅳ	BB
Chuanmai614	China	Ⅳ	AA
Shumai2074	China	Ⅳ	BB
Zhongkemai223	China	Ⅳ	BB
Chuanmai807	China	Ⅳ	BB
Jianpinmai506	China	Ⅳ	BB
Chuanfu24	China	Ⅳ	BB
Chuanyu44	China	Ⅳ	BB
Chuannong48	China	Ⅳ	BB
Chuanmai806	China	Ⅳ	BB
Yumai6	China	Ⅳ	BB
Shumai2014	China	Ⅳ	BB
Kecheng18	China	Ⅳ	BB
Chuanmai621	China	Ⅳ	BB
Xike602	China	Ⅳ	AA
Nimai2020	China	Ⅳ	BB
Zhongnuo258	China	Ⅳ	BB
Shuchai1801	China	Ⅳ	BB
Chuanfuchai222	China	Ⅳ	BB
Zhongnuo11	China	Ⅳ	BB
Mianchai838	China	Ⅳ	BB
Lunuo3	China	Ⅳ	AA
Mianmai909	China	Ⅳ	BB
Chuanmai617	China	Ⅳ	BB
Chuanyu46	China	Ⅳ	BB
Chuanfuliang461	China	Ⅳ	BB
Kecheng16	China	Ⅳ	BB
Shumai2017	China	Ⅳ	BB
Neiliangmai62	China	Ⅳ	AA
Chuanyu52	China	Ⅳ	BB
Chuanmai1966	China	Ⅳ	BB
Chuanmai51	China	Ⅳ	BB
Chuannong32	China	Ⅳ	BB
Mianmai367	China	Ⅳ	BB
Xiaobingmai33	China	Ⅵ	BB
Xichang18	China	Ⅸ	BB
Mahon	Algeria		BB
Improved Steinwedel	Australia		BB
Aussie	Australia		BB
Sultan	Australia		BB
Sunset	Australia		BB
Ford	Australia		BB
Fife	Australia		BB
Early Bird	Australia		BB
Majestic	Australia		BB
Rajah	Australia		BB
Cedar	Australia		BB
Union	Australia		BB
Waratah	Australia		BB
Canberra	Australia		BB
Exquisite	Australia		BB
Federation	Australia		BB
Duchess	Australia		BB
Bebrovo	Bulgaria		BB
Constantin	Bulgaria		BB
Bebrovo	Bulgaria		BB
Constantin	Bulgaria		BB
Golema Franga	Bulgaria		BB
Shan wheat	Burma		BB
2193/20-12	Burma		BB
2193/20-14	Burma		BB
Blé mavratheri	Crete		BB
Blé cheliostazo	Crete		BB
Blé cheliostazo	Crete		BB
Psathas	Cyprus		BB
Asprokoutsoullon	Cyprus		BB
Alliés	France		BB
Vilmorin 29	France		BB
P.M.L.1	France		BB
Carré Géant blanc	France		BB
Bladette de Besplas	France		BB
Rouge de St-Laud	France		BB
Roux de Presles	France		BB
Rouge des Ardennes	France		BB
Way	France		BB
Wilson jaune	France		BB
Rouge de Bordeaux	France		BB
Parsel	France		BB
Blé Seigle	France		BB
Saissette de Maninet P	France		BB
Maylin	France		BB
Deve	Greece		BB
Asprotheri	Greece		BB
Trigonostaro	Greece		BB
Hokino	Greece		BB
Vardarka Chervenaka	Greece		BB
Asprotheri	Greece		AA
Zulitsa	Greece		BB
Arnaout	Greece		BB
Karabash	Greece		BB
Pusa 80-5	India		BB
Pusa 90	India		BB
Gangajali	India		BB
Boojri	India		BB
Dehak	India		BB
Dehak	India		BB
Dolatkhani (white)	India		BB
Gahu (Nepali) or Kyo (Sikkimese)	India		BB
Desi	India		BB
Pusa 4	India		BB
Rodi Garamseli	India		BB
Desi	India		BB
Pashmak	India		BB
Pashmak	India		BB
Pusa 6	India		BB
Federation	India		BB
Thori (beardless)	India		BB
Phundi	India		BB
Ka	India		BB
Thori	India		BB
Bhawarwall	India		BB
Desi	India		BB
Gahu (Nepali) or Kyo (Sikkimese)	India		BB
Mundia	India		BB
Mundia	India		BB
Gahu (Nepali) or Kyo (Sikkimese)	India		BB
Boojri	India		BB
Desi White	India		BB
Boojri (bearded)	India		BB
Pusa 52	India		BB
Lyallpur 14	India		BB
Lalia	India		BB
White Murga	India		BB
White Tikoria	India		BB
Desi White	India		BB
Soor Ghanum	India		BB
Dehak	India		BB
Desi	India		BB
Desi	India		BB
Lyallpur 14	India		BB
Desi	India		BB
Setwa	India		BB
Sur	India		BB
Desi White	India		BB
Desi	India		BB
Desi	India		BB
Desi	India		BB
Desi	India		BB
Desi	India		BB
Desi	India		BB
Soor Ghanum	India		BB
Soor Ghanum	India		BB
Soor Ghanum	India		BB
Soor Ghanum	India		BB
Soor Ghanum	India		BB
Lyallpur 10	India		BB
Lyallpur 11	India		BB
Desi White	India		BB
Spin	India		BB
Lalia Desi	India		BB
Desi	India		BB
Dandi	India		BB
Sambhoria (Lalwali Wala)	India		BB
Desi	India		BB
Dehak Panjabi	India		BB
Samna	India		BB
Punjab 8A	India		BB
Kaghzi Desi	India		BB
Lyallpur 11	India		BB
Lyallpur 8A	India		BB
Gahu (Nepali) or Kyo (Sikkimese)	India		BB
Gahu (Nepali) or Kyo (Sikkimese)	India		BB
Walaiti (Mastung wheat)	India		BB
Desi	India		BB
C.	India		BB
Gahu (Nepali) or Kyo (Sikkimese)	India		BB
Thori	India		BB
Desi	India		BB
Sufed Panjabi	India		BB
Desi	India		BB
Gahu (Nepali) or Kyo (Sikkimese)	India		BB
Gahu (Nepali) or Kyo (Sikkimese)	India		BB
Pusa 6	India		BB
Lalmi	India		BB
Abi	India		BB
Abi	India		BB
Pusa 80-5	India		BB
Malo	India		BB
Mundia	India		BB
Autumn wheat	Iran		BB
Razan Ferahan	Iran		BB
Kerbelai Ali Khani	Iran		BB
Sarakhs	Iran		BB
Vilayati	Iran		BB
Sarakh	Iran		BB
Kal	Iran		BB
Sari Boghda	Iran		BB
Serabend	Iran		BB
Safid	Iran		BB
Zardak-i-Harrami	Iran		BB
Ab Mahi	Iran		BB
Khal Kirmiz	Iran		BB
Ab Mahi	Iran		BB
Qizilqin Boghda	Iran		BB
Khusheh Safid	Iran		BB
Vilayati	Iran		BB
Sukh Das	Iran		BB
Ma'auneh	Iran		BB
Gandum-i-Jiruft	Iran		BB
Muganka x Belokoloska	Iran		BB
Rustam Exp Farm 99	Iraq		AA
Kandhari, Rustam Exp Farm 859	Iraq		BB
Humairah, Rustam Exp Farm 595	Iraq		BB
Rustam Exp Farm 79	Iraq		BB
Rustam Exp Farm 171	Iraq		BB
Mairca di Pali, Flaksberger 19341	Italy		BB
Gentil Rossa, Flaksberger 19927	Italy		BB
Decimomanna, Flaksberger 20119	Italy		BB
Edda	Italy		BB
Piccolo	Italy		BB
Mahan	Morocco		BB
Mahan	Morocco		BB
Mughari	Palestine		BB
Abu Fashi	Palestine		BB
Wysololitewka Sobieszynska	Poland		BB
Trigo preto rijo	Poland		BB
Bialy Krzyz Ryxa	Poland		BB
Hors Concurs	Poland		BB
Kolben Heinego	Poland		BB
Kujawianka Wieclawicka	Poland		BB
Superelekta Kleszczynskich	Poland		BB
Extra Kolben Heinego	Poland		BB
Surka Cezostna	Poland		BB
Ostka Wieclawicka	Poland		AA
Ostka Skomoroska	Poland		BB
Hors Concurs	Poland		BB
Zlotka Miczynskiego	Poland		BB
Ⅰ, Northern Winter Wheat Zone; Ⅱ, Yellow and Huai River Valleys Facultative Wheat Zone; Ⅲ, Middle and Lower Yangtze Valleys Autumn-Sown Spring Wheat Zone; Ⅳ, Southwestern Autumn-Sown Spring Wheat Zone; Ⅵ, Northeastern Spring Wheat Zone; Ⅸ, Qinghai-Tibetan Plateau Spring-Winter Wheat Zone.

## Sheet: Table S9
Table S9 Candidate genes in the interval of QTgw.cib-6A.
Genes	Location	Annotation	Homologous in rice	The function of homologous in rice
TraesCS6A02G185500	217637852 - 217642628	Vacuolar processing enzyme	OsBgal2	Similar to Beta-galactosidase precursor (EC 3.2.1.23) (Lactase)
TraesCS6A02G185400	217264049 - 217269493	Beta-galactosidase
TraesCS6A02G185300	217217596 - 217235203	Interferon-related developmental regulator 1
TraesCS6A02G185100	216461871 - 216463460	Allene oxide synthase
TraesCS6A02G183500	213993001 - 213993448	Alpha-1,4-glucan-protein synthase [UDP-forming]
TraesCS6A02G185000	216100732 - 216101133	DNA mismatch repair protein MutS
TraesCS6A02G184900	215598779 - 215598976	NAD(P)H-quinone oxidoreductase subunit 2 B, chloroplastic
TraesCS6A02G185200	216934358 - 216934639	Eukaryotic translation initiation factor 3 subunit A
TraesCS6A02G184300	215097083 - 215098429	Pentatricopeptide repeat-containing protein, putative
TraesCS6A02G183600	214161833 - 214162117	DEAD/DEAH box RNA helicase family protein
TraesCS6A02G184000	214558996 - 214563138	Receptor-kinase, putative	Os11g0569600	Similar to Receptor kinase-like protein
TraesCS6A02G183900	214215933 - 214216535	Tyrosine recombinase XerC
TraesCS6A02G184500	215527746 - 215532393	Pectate lyase	OsPLL3	Pectate lyase-like protein, Pollen developmen
TraesCS6A02G183400	213868496 - 213881210	Ribosomal RNA small subunit methyltransferase B	Os02g0217800	Similar to NOL1R
